# Supplementary material for: Uncovering and resolving challenges of quantitative modeling in a simplified community of interacting cells
Source: PLoS Biol. 2019 Feb 22;17(2):e3000135. doi: 10.1371/journal.pbio.3000135 (PMC6402699; doi:10.1371/journal.pbio.3000135)
Supplement: S1 Data — CoSMO, Cooperation that is Synthetic and Mutually Obligatory. (XLSX) [file pbio.3000135.s043.xlsx]

## Sheet: Fig1B WellMixedCoSMO
Date	Person	Rep	time (hr)	L-A+	A-L+	total	growth rate (/hr)
20150922	SH	A	0	1750000	1750000	3500000
20150922	SH	A	5.83333	2.82578e+06	1.81122e+06	4.66307e+06
20150922	SH	A	22.6667	4.94989e+06	9.88027e+06	1.49536e+07
20150922	SH	A	29.5	1.59794e+07	8.89402e+06	2.50665e+07
20150922	SH	A	46.5	3.02738e+08	2.47435e+07	3.28259e+08
20150922	SH	A	53.5	4.37979e+08	2.77524e+08	7.19382e+08
20150922	SH	A	74.5	1.69142e+09	1.93537e+09	3.64339e+09	0.109344
20150922	SH	B	0	1750000	1750000	3500000
20150922	SH	B	5.83333	2.84578e+06	1.80259e+06	4.67382e+06
20150922	SH	B	22.6667	4.88255e+06	5.63214e+06	1.05851e+07
20150922	SH	B	29.5	2.13183e+07	5.95196e+06	2.73732e+07
20150922	SH	B	46.5	2.84611e+08	4.8026e+07	3.34123e+08
20150922	SH	B	53.5	3.68866e+08	3.54054e+08	7.25616e+08
20150922	SH	B	74.5	1.18573e+09	1.26824e+09	2.46947e+09	0.0986902
20150922	SH	C	0	1750000	1750000	3500000
20150922	SH	C	5.83333	2.80218e+06	1.86475e+06	4.69884e+06
20150922	SH	C	22.6667	4.72404e+06	5.06556e+06	9.86301e+06
20150922	SH	C	29.5	2.05522e+07	5.69494e+06	2.63567e+07
20150922	SH	C	46.5	2.90044e+08	4.83746e+07	3.39356e+08
20150922	SH	C	53.5	3.76486e+08	3.60907e+08	7.40791e+08
20150922	SH	C	74.5	1.55006e+09	1.7287e+09	3.30381e+09	0.106025
20151230	HM	A1	0	1.39829e+06	1.18628e+06	2.58457e+06
20151230	HM	A1	6.98333	1.68993e+06	1.42068e+06	3.11061e+06
20151230	HM	A1	20.6667	2.28314e+06	3.32207e+06	5.60521e+06
20151230	HM	A1	29.1667	3.74556e+06	3.63856e+06	7.38412e+06
20151230	HM	A1	44.5	1.04685e+08	4.98882e+06	1.09674e+08
20151230	HM	A1	53.8333	2.45461e+08	7.07122e+07	3.16173e+08
20151230	HM	A1	68.33	4.31202e+08	9.36231e+08	1.36743e+09	0.119946
20151230	HM	A1	77.116	9.09849e+08	1.63706e+09	2.54691e+09
20150810	SH	J	0	2.21637e+06	1.67573e+06	3.90993e+06
20150810	SH	J	6.5	3.58034e+06	2.25603e+06	5.88715e+06
20150810	SH	J	23	4.02755e+06	4.80469e+06	8.89175e+06
20150810	SH	J	30.5	4.26504e+07	6.41977e+06	4.92957e+07
20150810	SH	J	47	3.19377e+08	1.06557e+08	4.28539e+08
20150810	SH	J	71	1.33317e+09	1.89709e+09	3.26288e+09	0.102149
20150810	SH	K	0	2.21637e+06	1.67573e+06	3.90993e+06
20150810	SH	K	6.5	3.32735e+06	2.04338e+06	5.44479e+06
20150810	SH	K	23	4.42141e+06	5.1344e+06	9.62527e+06
20150810	SH	K	30.5	4.17646e+07	6.39574e+06	4.83352e+07
20150810	SH	K	47	3.23867e+08	1.03333e+08	4.30366e+08
20150810	SH	K	71	1.62333e+09	1.99637e+09	3.6533e+09	0.105517
20150810	SH	L	0	2.21637e+06	1.67573e+06	3.90993e+06
20150810	SH	L	6.5	3.34353e+06	2.00243e+06	5.43782e+06
20150810	SH	L	23	4.06969e+06	5.18015e+06	9.33485e+06
20150810	SH	L	30.5	3.8352e+07	6.48298e+06	4.50657e+07
20150810	SH	L	47	3.56259e+08	9.03362e+07	4.49187e+08
20150810	SH	L	71	1.76828e+09	2.06847e+09	3.872e+09	0.108499
						ave	0.107167
						2stdev	0.0134382
