# Supplementary material for: Uncovering and resolving challenges of quantitative modeling in a simplified community of interacting cells
Source: PLoS Biol. 2019 Feb 22;17(2):e3000135. doi: 10.1371/journal.pbio.3000135 (PMC6402699; doi:10.1371/journal.pbio.3000135)
Supplement: S1 Table — (XLSX) [file pbio.3000135.s027.xlsx]

## Sheet: Sheet1
WY#	Notes	mating type	Fluorescence	Auxotrophy	Overproduction	Full genotype (all strains: ho::loxP AMN1-BY)
1335	[L- A+] ancestor	a	mCherry	lys	hyp	ste3::Hph fba1::FBA1-mCherry-loxP ade4::ADE4-PUR6(o/e) lys2::loxP
1340	[A- L+] ancestor	a	GFP	ade/hyp	lys	ste3::NAT fba1::FBA1-EGFP-loxP lys21::LYS21(o/e) ade8::loxP
1342	[A- L+] ancestor	a	Citrine	ade/hyp	lys	ste3::NAT fba1::FBA1-Citrine-loxP lys21::LYS21(o/e) ade8::loxP
1598	[A- L+] evolved	a	GFP	ade/hyp	lys	ste3::NAT fba1::FBA1-EGFP-loxP lys21::LYS21(o/e) ade8::loxP gln1(A169T) rmd1(G177G)
1600	[A- L+] evolved	a	GFP	ade/hyp	lys	ste3::NAT fba1::FBA1-EGFP-loxP lys21::LYS21(o/e) ade8::loxP gln1(P335L) urb2(E1004E) alp1(T354K) DuplicateChr5
1657	[L- A+] ancestor	a	BFP	lys	hyp	ste3::Hph fba1::FBA1-BFP-KanMX ade4::ADE4-PUR6(o/e) lys2::loxP
2226	[L- A+] ecm21	a	mCherry	lys	hyp	ste3::Hph fba1::FBA1-mCherry-loxP ade4::ADE4-PUR6(o/e) lys2::loxP ecm21::NAT
2270	[L- A+] disomy 14, ecm21	alpha	mCherry	lys	hyp	fba1::FBA1-mCherry-loxP ade4::ADE4-PUR6(o/e) lys2::loxP ecm21(T812A) ypl247C(G150T) DuplicateChr14
2447	[A- L+] evolved	a	Citrine	ade/hyp	lys	ste3::NAT fba1::FBA1-Citrine-loxP lys21::LYS21(o/e) ade8::loxP oar1(C102S) nab3(L710L) DuplicateChr1 DuplicateChr6 DuplicateChr3?
