# Supplementary material for: Uncovering and resolving challenges of quantitative modeling in a simplified community of interacting cells
Source: PLoS Biol. 2019 Feb 22;17(2):e3000135. doi: 10.1371/journal.pbio.3000135 (PMC6402699; doi:10.1371/journal.pbio.3000135)
Supplement: S2 Data — (XLSX) [file pbio.3000135.s044.xlsx]

## Sheet: Fig2A
Retention time	supernatant		standards						standard curve inset:
R.Time (min)	10-11_1_t7	10-11_6_t7	15uM_lys_SD	30uM_lys_SD	45uM_lys_SD	60uM_lys_SD			lys uM	area
12.5	1080	148	-387	26	601	45			15	1551496
12.5013	1077	138	-399	12	591	39			30	3587058
12.5027	1070	124	-413	-5	571	25			45	6046039
12.504	1074	122	-419	-2	558	22			60	7571547
12.5053	1080	123	-424	10	556	22
12.5067	1080	127	-426	23	561	27
12.508	1079	120	-433	20	567	23
12.5093	1087	128	-431	24	582	33
12.5107	1096	134	-431	29	581	37
12.512	1104	138	-436	31	572	33
12.5133	1097	143	-435	30	562	33
12.5147	1093	137	-447	23	550	31
12.516	1108	124	-452	30	551	29
12.5173	1113	112	-456	32	553	28
12.5187	1113	99	-470	24	546	27
12.52	1103	95	-482	14	533	14
12.5213	1106	113	-479	21	543	13
12.5227	1122	122	-471	37	560	22
12.524	1131	129	-471	47	566	29
12.5253	1129	127	-471	46	564	25
12.5267	1124	126	-478	37	556	13
12.528	1125	139	-482	42	547	17
12.5293	1123	141	-480	40	541	18
12.5307	1121	136	-478	34	542	25
12.532	1115	128	-476	34	548	34
12.5333	1110	123	-482	25	547	17
12.5347	1111	123	-481	24	560	15
12.536	1120	130	-469	23	577	27
12.5373	1135	141	-451	18	586	42
12.5387	1134	144	-440	25	597	54
12.54	1135	149	-434	36	608	45
12.5413	1150	157	-418	41	620	39
12.5427	1154	159	-423	39	615	34
12.544	1150	152	-435	35	608	32
12.5453	1147	154	-423	32	611	40
12.5467	1144	166	-404	45	629	55
12.548	1143	174	-396	43	648	60
12.5493	1143	175	-397	32	659	56
12.5507	1145	175	-393	39	671	56
12.552	1144	168	-394	35	668	43
12.5533	1142	169	-388	32	667	34
12.5547	1131	172	-390	32	665	28
12.556	1123	165	-407	27	658	15
12.5573	1128	162	-406	27	661	7
12.5587	1133	158	-396	31	670	7
12.56	1136	159	-388	33	680	10
12.5613	1148	161	-367	41	693	18
12.5627	1158	161	-362	64	700	29
12.564	1152	165	-371	67	694	25
12.5653	1139	164	-375	52	682	19
12.5667	1131	150	-392	32	673	12
12.568	1128	129	-415	16	660	3
12.5693	1123	117	-420	7	647	-2
12.5707	1107	112	-433	-10	630	-10
12.572	1094	106	-447	-31	612	-18
12.5733	1097	98	-451	-46	610	-29
12.5747	1098	91	-463	-53	606	-32
12.576	1097	88	-474	-55	594	-42
12.5773	1092	90	-476	-53	576	-52
12.5787	1069	88	-487	-58	549	-54
12.58	1063	89	-492	-52	547	-48
12.5813	1071	94	-493	-47	556	-48
12.5827	1074	92	-511	-51	553	-53
12.584	1075	87	-524	-58	545	-63
12.5853	1071	74	-530	-73	529	-80
12.5867	1060	67	-543	-91	514	-88
12.588	1055	62	-562	-99	505	-84
12.5893	1044	46	-585	-112	491	-93
12.5907	1033	30	-607	-128	469	-114
12.592	1033	24	-622	-127	453	-112
12.5933	1023	23	-633	-128	433	-108
12.5947	1019	13	-647	-133	414	-125
12.596	1014	-6	-675	-141	394	-143
12.5973	1007	-22	-700	-161	380	-153
12.5987	992	-40	-715	-179	369	-176
12.6	978	-44	-739	-186	349	-196
12.6013	981	-42	-748	-184	338	-189
12.6027	963	-52	-763	-194	321	-188
12.604	950	-55	-786	-205	298	-204
12.6053	960	-52	-802	-205	280	-211
12.6067	969	-51	-817	-203	267	-205
12.608	965	-54	-832	-207	256	-203
12.6093	957	-65	-856	-213	236	-216
12.6107	945	-83	-885	-215	220	-231
12.612	925	-110	-920	-236	201	-254
12.6133	912	-127	-945	-254	177	-269
12.6147	905	-146	-965	-270	141	-278
12.616	900	-158	-994	-286	107	-297
12.6173	897	-164	-1024	-290	92	-310
12.6187	895	-189	-1058	-300	76	-326
12.62	881	-210	-1092	-320	52	-348
12.6213	868	-215	-1115	-332	32	-356
12.6227	870	-215	-1135	-336	23	-353
12.624	868	-205	-1163	-345	5	-353
12.6253	870	-196	-1187	-351	-19	-353
12.6267	869	-207	-1204	-361	-31	-361
12.628	857	-226	-1230	-377	-44	-371
12.6293	854	-239	-1263	-397	-66	-384
12.6307	854	-252	-1300	-405	-94	-393
12.632	834	-275	-1340	-414	-127	-409
12.6333	828	-285	-1374	-413	-147	-420
12.6347	839	-281	-1404	-410	-164	-422
12.636	832	-296	-1428	-425	-190	-434
12.6373	817	-313	-1450	-434	-218	-446
12.6387	817	-317	-1479	-443	-244	-452
12.64	812	-333	-1525	-459	-270	-467
12.6413	801	-352	-1573	-476	-302	-479
12.6427	796	-367	-1610	-492	-337	-486
12.644	784	-394	-1651	-495	-365	-507
12.6453	771	-416	-1697	-509	-395	-526
12.6467	778	-420	-1723	-516	-419	-524
12.648	799	-420	-1747	-511	-427	-522
12.6493	799	-420	-1776	-508	-439	-525
12.6507	785	-434	-1817	-520	-467	-544
12.652	784	-454	-1856	-535	-497	-562
12.6533	782	-464	-1884	-540	-520	-573
12.6547	781	-486	-1921	-548	-541	-593
12.656	785	-504	-1959	-556	-558	-607
12.6573	796	-506	-1987	-563	-573	-607
12.6587	798	-507	-2017	-563	-589	-604
12.66	788	-501	-2053	-567	-605	-597
12.6613	787	-507	-2073	-579	-618	-604
12.6627	796	-518	-2094	-581	-618	-611
12.664	811	-519	-2117	-570	-616	-601
12.6653	823	-521	-2135	-562	-628	-600
12.6667	830	-514	-2155	-554	-633	-597
12.668	828	-516	-2175	-557	-641	-596
12.6693	832	-525	-2188	-570	-653	-595
12.6707	854	-531	-2205	-568	-654	-599
12.672	865	-539	-2229	-566	-662	-602
12.6733	876	-544	-2235	-569	-667	-595
12.6747	900	-546	-2236	-553	-660	-585
12.676	922	-539	-2248	-531	-644	-564
12.6773	944	-528	-2250	-515	-629	-544
12.6787	959	-525	-2268	-521	-624	-538
12.68	986	-518	-2281	-529	-617	-526
12.6813	1009	-515	-2279	-528	-603	-519
12.6827	1022	-517	-2277	-529	-601	-515
12.684	1041	-497	-2270	-519	-592	-498
12.6853	1060	-474	-2270	-504	-557	-477
12.6867	1065	-475	-2285	-505	-542	-472
12.688	1086	-476	-2281	-504	-534	-466
12.6893	1115	-467	-2266	-498	-517	-457
12.6907	1134	-444	-2246	-475	-498	-436
12.692	1143	-431	-2237	-461	-479	-425
12.6933	1153	-430	-2238	-460	-460	-427
12.6947	1164	-437	-2228	-460	-437	-421
12.696	1186	-433	-2216	-458	-416	-419
12.6973	1219	-417	-2193	-435	-383	-400
12.6987	1261	-391	-2157	-412	-340	-363
12.7	1304	-358	-2132	-405	-309	-338
12.7013	1315	-345	-2120	-404	-286	-335
12.7027	1323	-329	-2096	-394	-252	-328
12.704	1340	-312	-2072	-393	-230	-319
12.7053	1373	-297	-2044	-380	-206	-310
12.7067	1412	-274	-2009	-359	-165	-298
12.708	1434	-265	-1987	-347	-123	-285
12.7093	1456	-256	-1966	-329	-87	-262
12.7107	1481	-235	-1934	-317	-48	-243
12.712	1487	-226	-1913	-321	-16	-242
12.7133	1497	-219	-1894	-314	11	-234
12.7147	1540	-188	-1855	-295	50	-206
12.716	1582	-168	-1822	-285	87	-184
12.7173	1610	-158	-1789	-274	121	-165
12.7187	1636	-147	-1755	-264	161	-143
12.72	1662	-119	-1717	-250	197	-123
12.7213	1686	-92	-1685	-228	231	-111
12.7227	1705	-85	-1662	-216	271	-110
12.724	1727	-68	-1625	-212	302	-105
12.7253	1756	-38	-1587	-200	332	-81
12.7267	1777	-21	-1553	-187	366	-56
12.728	1786	-15	-1527	-184	387	-52
12.7293	1805	-10	-1513	-173	409	-57
12.7307	1838	1	-1485	-160	447	-54
12.732	1866	27	-1445	-152	480	-24
12.7333	1884	39	-1417	-150	501	-6
12.7347	1896	33	-1400	-149	514	-11
12.736	1920	41	-1372	-132	542	5
12.7373	1941	58	-1341	-125	573	25
12.7387	1956	72	-1302	-124	609	40
12.74	1980	92	-1266	-110	645	56
12.7413	2016	115	-1242	-103	678	68
12.7427	2049	135	-1208	-102	715	89
12.744	2063	148	-1181	-102	728	104
12.7453	2072	152	-1163	-96	744	105
12.7467	2104	167	-1131	-79	781	125
12.748	2134	193	-1095	-68	814	143
12.7493	2143	199	-1074	-63	829	153
12.7507	2151	204	-1054	-58	844	164
12.752	2168	233	-1017	-43	886	169
12.7533	2184	256	-986	-31	918	172
12.7547	2194	257	-976	-44	929	170
12.756	2207	259	-964	-60	943	162
12.7573	2236	283	-922	-51	975	176
12.7587	2252	301	-885	-37	1012	192
12.76	2259	313	-856	-22	1048	201
12.7613	2274	347	-820	-19	1092	216
12.7627	2288	368	-794	-27	1119	229
12.764	2310	389	-748	-8	1142	246
12.7653	2330	403	-708	1	1167	255
12.7667	2334	404	-686	-9	1189	252
12.768	2346	422	-647	-7	1226	257
12.7693	2357	435	-616	-8	1251	271
12.7707	2363	438	-590	-4	1262	287
12.772	2364	444	-563	4	1274	301
12.7733	2360	458	-531	-3	1296	301
12.7747	2364	469	-500	-4	1324	296
12.776	2366	481	-473	10	1345	296
12.7773	2369	497	-431	13	1369	293
12.7787	2380	508	-391	16	1391	291
12.78	2371	511	-367	17	1414	287
12.7813	2362	518	-329	29	1432	296
12.7827	2365	524	-292	40	1444	316
12.784	2360	525	-273	40	1461	322
12.7853	2352	530	-259	42	1481	321
12.7867	2335	538	-247	34	1495	314
12.788	2329	543	-227	35	1509	317
12.7893	2331	552	-200	50	1530	329
12.7907	2330	567	-176	63	1558	336
12.792	2326	574	-159	73	1567	344
12.7933	2316	564	-147	67	1552	334
12.7947	2305	555	-128	60	1552	317
12.796	2296	553	-107	69	1565	322
12.7973	2284	557	-99	74	1562	336
12.7987	2269	555	-98	76	1544	339
12.8	2256	554	-96	75	1534	337
12.8013	2247	565	-83	80	1535	338
12.8027	2239	562	-77	77	1531	330
12.804	2235	562	-71	76	1534	328
12.8053	2226	568	-56	87	1534	331
12.8067	2222	573	-49	90	1532	337
12.808	2210	561	-59	78	1520	323
12.8093	2200	550	-58	76	1503	318
12.8107	2178	543	-51	76	1491	330
12.812	2158	537	-45	75	1485	332
12.8133	2156	543	-33	91	1486	338
12.8147	2140	540	-42	92	1474	335
12.816	2130	531	-53	91	1462	325
12.8173	2125	516	-53	101	1450	319
12.8187	2111	514	-64	113	1436	322
12.82	2089	508	-74	110	1421	314
12.8213	2078	504	-72	112	1412	305
12.8227	2062	492	-74	119	1396	295
12.824	2049	475	-80	113	1371	285
12.8253	2036	467	-82	101	1353	283
12.8267	2018	460	-85	94	1346	274
12.828	2009	459	-88	108	1347	272
12.8293	2016	463	-88	126	1351	295
12.8307	2013	464	-94	130	1348	302
12.832	1994	457	-116	128	1327	285
12.8333	1984	441	-133	125	1307	277
12.8347	1972	426	-126	119	1301	280
12.836	1956	412	-125	114	1283	273
12.8373	1939	400	-141	122	1268	252
12.8387	1933	398	-149	147	1269	246
12.84	1924	384	-158	154	1263	248
12.8413	1914	385	-157	152	1247	258
12.8427	1907	396	-149	168	1239	271
12.844	1911	390	-154	181	1236	275
12.8453	1918	385	-161	182	1231	273
12.8467	1908	380	-170	183	1222	273
12.848	1889	369	-195	180	1206	263
12.8493	1876	362	-211	175	1197	261
12.8507	1875	366	-211	184	1195	274
12.852	1857	351	-228	181	1165	260
12.8533	1838	329	-249	173	1131	241
12.8547	1836	322	-247	178	1121	237
12.856	1826	315	-253	174	1104	231
12.8573	1817	305	-270	168	1077	228
12.8587	1815	289	-284	169	1060	223
12.86	1821	281	-298	174	1044	218
12.8613	1812	277	-317	171	1028	224
12.8627	1790	260	-341	169	1014	222
12.864	1789	257	-355	179	1007	219
12.8653	1788	266	-364	194	997	226
12.8667	1785	268	-363	207	982	235
12.868	1779	267	-364	221	971	241
12.8693	1771	264	-375	223	957	229
12.8707	1759	254	-391	212	936	209
12.872	1763	247	-395	222	932	216
12.8733	1778	254	-396	247	940	235
12.8747	1773	245	-412	242	929	236
12.876	1771	238	-425	235	911	231
12.8773	1782	243	-436	240	887	231
12.8787	1782	232	-453	236	862	224
12.88	1786	218	-472	234	838	218
12.8813	1799	219	-485	242	829	219
12.8827	1806	224	-492	250	833	236
12.884	1797	209	-520	244	807	245
12.8853	1785	191	-550	243	783	251
12.8867	1794	195	-557	253	776	273
12.888	1792	199	-578	248	746	273
12.8893	1788	195	-610	253	725	264
12.8907	1804	192	-619	275	722	285
12.892	1825	198	-630	288	709	309
12.8933	1838	206	-650	296	700	324
12.8947	1839	201	-666	294	686	333
12.896	1851	200	-688	290	665	333
12.8973	1870	206	-714	301	645	347
12.8987	1892	221	-730	319	639	384
12.9	1914	240	-748	346	629	410
12.9013	1937	259	-765	370	606	432
12.9027	1960	269	-790	378	586	456
12.904	2004	289	-801	405	580	500
12.9053	2056	324	-806	434	582	549
12.9067	2100	354	-815	457	587	606
12.908	2157	390	-823	489	589	672
12.9093	2214	433	-846	518	584	717
12.9107	2264	470	-869	545	580	772
12.912	2323	502	-884	582	578	847
12.9133	2392	551	-889	631	575	927
12.9147	2462	615	-892	693	575	1009
12.916	2547	683	-902	746	577	1100
12.9173	2637	742	-919	781	577	1190
12.9187	2729	811	-936	821	589	1293
12.92	2847	910	-948	886	614	1422
12.9213	2977	1029	-924	969	641	1573
12.9227	3111	1151	-894	1053	666	1739
12.924	3261	1271	-905	1133	681	1917
12.9253	3424	1401	-911	1218	711	2104
12.9267	3588	1546	-904	1317	747	2297
12.928	3762	1692	-906	1427	778	2508
12.9293	3958	1851	-905	1542	826	2730
12.9307	4175	2037	-898	1650	873	2974
12.932	4416	2245	-875	1780	929	3270
12.9333	4699	2480	-836	1951	1013	3612
12.9347	5021	2740	-794	2136	1102	3982
12.936	5347	3029	-759	2334	1192	4385
12.9373	5677	3324	-738	2535	1272	4808
12.9387	6048	3648	-709	2751	1367	5269
12.94	6480	4013	-671	3004	1477	5794
12.9413	6972	4406	-626	3293	1588	6396
12.9427	7525	4850	-560	3619	1723	7082
12.944	8152	5364	-482	3990	1887	7868
12.9453	8844	5929	-424	4398	2051	8758
12.9467	9613	6552	-367	4859	2217	9763
12.948	10494	7258	-290	5383	2406	10917
12.9493	11518	8070	-199	5979	2622	12248
12.9507	12706	8998	-91	6668	2873	13781
12.952	14044	10040	27	7449	3155	15530
12.9533	15563	11233	148	8336	3458	17519
12.9547	17307	12590	276	9333	3796	19790
12.956	19272	14134	414	10456	4173	22373
12.9573	21487	15904	575	11725	4601	25296
12.9587	24005	17913	760	13158	5090	28574
12.96	26825	20186	963	14752	5636	32235
12.9613	29953	22753	1199	16508	6256	36292
12.9627	33426	25640	1447	18445	6958	40737
12.964	37238	28863	1711	20556	7751	45581
12.9653	41383	32451	2030	22851	8661	50824
12.9667	45858	36411	2398	25314	9693	56437
12.968	50664	40739	2807	27944	10875	62393
12.9693	55765	45443	3284	30726	12217	68646
12.9707	61126	50511	3826	33628	13741	75149
12.972	66718	55913	4431	36628	15459	81847
12.9733	72488	61622	5099	39705	17385	88639
12.9747	78381	67609	5838	42846	19545	95458
12.976	84347	73828	6673	46021	21957	102249
12.9773	90299	80199	7586	49154	24628	108918
12.9787	96178	86643	8580	52221	27553	115376
12.98	101924	93120	9660	55210	30743	121550
12.9813	107453	99556	10815	58057	34188	127362
12.9827	112709	105850	12052	60716	37878	132755
12.984	117654	111964	13367	63191	41812	137676
12.9853	122215	117820	14744	65440	45965	142061
12.9867	126323	123327	16178	67424	50311	145860
12.988	129971	128429	17652	69129	54817	149051
12.9893	133109	133072	19151	70542	59438	151611
12.9907	135716	137221	20673	71662	64147	153530
12.992	137778	140824	22189	72474	68895	154809
12.9933	139281	143845	23683	72980	73625	155441
12.9947	140250	146286	25152	73192	78300	155479
12.996	140686	148127	26562	73112	82865	154942
12.9973	140581	149350	27906	72739	87261	153832
12.9987	139962	149978	29166	72087	91443	152192
13	138880	150035	30314	71189	95372	150075
13.0013	137357	149557	31347	70081	99011	147524
13.0027	135422	148541	32241	68764	102321	144581
13.004	133139	147021	33010	67276	105286	141315
13.0053	130526	145079	33660	65644	107870	137759
13.0067	127615	142751	34168	63887	110071	133965
13.008	124478	140051	34519	62026	111859	129980
13.0093	121131	137019	34710	60061	113223	125823
13.0107	117618	133711	34763	58051	114180	121560
13.012	113989	130157	34682	56011	114719	117241
13.0133	110256	126419	34474	53949	114875	112891
13.0147	106466	122546	34145	51891	114651	108542
13.016	102661	118563	33685	49845	114057	104210
13.0173	98878	114523	33142	47829	113140	99944
13.0187	95117	110430	32524	45841	111929	95760
13.02	91393	106317	31808	43896	110417	91657
13.0213	87740	102225	31028	42017	108638	87666
13.0227	84150	98170	30192	40190	106635	83791
13.024	80641	94178	29300	38414	104425	80045
13.0253	77254	90274	28383	36721	102046	76467
13.0267	73984	86459	27439	35087	99505	73039
13.028	70819	82752	26482	33519	96846	69743
13.0293	67792	79165	25516	32033	94109	66590
13.0307	64905	75714	24546	30619	91298	63591
13.032	62134	72394	23583	29274	88435	60754
13.0333	59475	69194	22634	27980	85550	58057
13.0347	56951	66131	21703	26754	82665	55490
13.036	54558	63207	20795	25600	79786	53070
13.0373	52274	60416	19905	24510	76919	50768
13.0387	50110	57766	19035	23489	74096	48581
13.04	48065	55251	18191	22522	71322	46531
13.0413	46131	52863	17385	21602	68619	44596
13.0427	44306	50612	16617	20744	65995	42774
13.044	42579	48481	15872	19933	63434	41063
13.0453	40940	46454	15147	19156	60948	39438
13.0467	39387	44535	14455	18428	58536	37884
13.048	37916	42717	13790	17734	56192	36415
13.0493	36524	40990	13146	17069	53936	35031
13.0507	35201	39358	12543	16441	51789	33717
13.052	33951	37827	11976	15846	49729	32484
13.0533	32780	36376	11440	15297	47752	31332
13.0547	31670	35000	10934	14775	45868	30226
13.056	30604	33696	10449	14269	44067	29163
13.0573	29595	32455	9996	13793	42354	28164
13.0587	28634	31266	9570	13332	40726	27195
13.06	27693	30117	9151	12872	39165	26251
13.0613	26799	29033	8752	12446	37680	25356
13.0627	25955	27996	8383	12055	36265	24509
13.064	25125	26986	8037	11665	34908	23681
13.0653	24319	26025	7700	11274	33615	22865
13.0667	23542	25089	7377	10887	32365	22073
13.068	22772	24172	7061	10500	31158	21295
13.0693	22039	23294	6758	10137	30015	20539
13.0707	21320	22438	6474	9784	28931	19800
13.072	20593	21590	6201	9421	27880	19074
13.0733	19900	20769	5958	9070	26864	18356
13.0747	19233	19976	5726	8739	25885	17649
13.076	18568	19186	5482	8402	24931	16949
13.0773	17904	18398	5229	8048	23996	16259
13.0787	17250	17626	4992	7712	23097	15586
13.08	16620	16881	4774	7391	22242	14929
13.0813	15991	16160	4558	7058	21402	14287
13.0827	15372	15440	4353	6739	20569	13651
13.084	14770	14729	4146	6433	19763	13014
13.0853	14192	14051	3937	6128	18982	12394
13.0867	13633	13394	3735	5833	18200	11794
13.088	13079	12727	3530	5548	17429	11207
13.0893	12539	12088	3335	5281	16699	10655
13.0907	12017	11492	3157	5026	15979	10124
13.092	11511	10905	2979	4773	15270	9595
13.0933	11025	10328	2797	4516	14592	9080
13.0947	10563	9775	2609	4263	13916	8591
13.096	10123	9252	2422	4034	13261	8128
13.0973	9714	8770	2255	3828	12636	7698
13.0987	9325	8302	2092	3626	12012	7287
13.1	8957	7854	1943	3438	11420	6902
13.1013	8613	7439	1804	3269	10857	6542
13.1027	8280	7049	1647	3108	10314	6193
13.104	7965	6687	1504	2954	9806	5873
13.1053	7674	6338	1373	2817	9320	5574
13.1067	7410	6012	1240	2690	8858	5293
13.108	7174	5723	1118	2566	8420	5035
13.1093	6947	5452	1013	2450	8009	4790
13.1107	6724	5197	915	2341	7626	4562
13.112	6509	4946	805	2238	7260	4344
13.1133	6305	4701	701	2144	6912	4142
13.1147	6130	4481	616	2058	6581	3949
13.116	5970	4285	536	1975	6272	3770
13.1173	5817	4106	458	1900	5997	3624
13.1187	5675	3922	382	1832	5745	3470
13.12	5548	3754	317	1765	5512	3318
13.1213	5427	3621	269	1695	5295	3193
13.1227	5309	3478	220	1617	5087	3068
13.124	5193	3328	169	1553	4900	2944
13.1253	5079	3189	118	1492	4713	2821
13.1267	4975	3073	71	1432	4540	2707
13.128	4877	2958	22	1387	4385	2596
13.1293	4797	2842	-16	1341	4241	2493
13.1307	4722	2737	-45	1290	4107	2410
13.132	4632	2627	-84	1240	3975	2321
13.1333	4543	2523	-124	1201	3856	2226
13.1347	4469	2422	-152	1159	3746	2142
13.136	4387	2324	-181	1106	3637	2050
13.1373	4302	2236	-221	1056	3537	1953
13.1387	4222	2148	-256	1012	3438	1866
13.14	4156	2070	-275	972	3341	1794
13.1413	4100	2000	-301	923	3241	1724
13.1427	4031	1918	-335	875	3126	1636
13.144	3974	1841	-356	832	3037	1558
13.1453	3941	1783	-369	799	2978	1514
13.1467	3899	1724	-388	774	2908	1473
13.148	3837	1645	-412	745	2826	1407
13.1493	3774	1569	-443	711	2743	1339
13.1507	3735	1520	-459	691	2680	1297
13.152	3703	1469	-466	675	2637	1254
13.1533	3670	1421	-477	656	2591	1207
13.1547	3629	1380	-495	631	2528	1157
13.156	3586	1343	-515	605	2458	1110
13.1573	3556	1318	-533	575	2409	1074
13.1587	3537	1296	-531	553	2381	1050
13.16	3515	1254	-519	541	2350	1025
13.1613	3497	1208	-529	523	2319	991
13.1627	3473	1180	-545	507	2288	956
13.164	3458	1164	-551	488	2261	915
13.1653	3459	1149	-545	475	2233	885
13.1667	3447	1130	-532	473	2219	871
13.168	3424	1115	-527	459	2213	858
13.1693	3410	1096	-534	450	2195	834
13.1707	3401	1074	-547	440	2175	803
13.172	3382	1053	-554	410	2152	781
13.1733	3372	1039	-556	399	2143	772
13.1747	3362	1027	-552	403	2140	761
13.176	3346	1004	-552	387	2121	743
13.1773	3328	993	-551	376	2118	735
13.1787	3305	996	-535	374	2127	733
13.18	3274	980	-547	364	2116	724
13.1813	3256	971	-554	353	2114	711
13.1827	3255	967	-548	334	2100	688
13.184	3257	953	-549	314	2066	668
13.1853	3263	949	-551	313	2062	672
13.1867	3258	949	-555	311	2064	674
13.188	3248	939	-561	306	2062	663
13.1893	3232	924	-571	294	2050	644
13.1907	3217	919	-581	273	2029	636
13.192	3212	919	-587	265	2012	623
13.1933	3207	915	-592	256	1994	602
13.1947	3201	906	-591	243	1978	600
13.196	3196	900	-579	238	1975	599
13.1973	3194	893	-573	238	1973	599
13.1987	3183	885	-579	230	1961	587
13.2	3166	882	-589	218	1945	570
13.2013	3155	882	-590	228	1934	559
13.2027	3150	878	-595	238	1922	547
13.204	3154	884	-602	240	1920	542
13.2053	3156	893	-608	235	1925	539
13.2067	3160	890	-604	231	1933	540
13.208	3165	879	-601	227	1930	547
13.2093	3158	868	-605	217	1914	551
13.2107	3160	868	-607	218	1901	545
13.212	3163	864	-613	221	1887	529
13.2133	3140	851	-626	208	1862	511
13.2147	3126	846	-640	206	1854	505
13.216	3133	847	-635	223	1862	508
13.2173	3131	845	-628	231	1858	508
13.2187	3125	838	-628	223	1847	505
13.22	3112	828	-626	202	1834	500
13.2213	3102	835	-642	186	1821	491
13.2227	3104	844	-657	181	1812	480
13.224	3102	834	-671	183	1810	479
13.2253	3083	834	-681	186	1817	481
13.2267	3068	824	-692	179	1809	462
13.228	3070	804	-695	169	1793	450
13.2293	3077	803	-687	166	1789	457
13.2307	3070	811	-689	156	1781	457
13.232	3063	809	-689	146	1777	446
13.2333	3063	793	-695	135	1773	427
13.2347	3055	775	-705	120	1758	419
13.236	3046	762	-716	112	1738	419
13.2373	3046	757	-718	122	1734	428
13.2387	3046	754	-715	126	1737	437
13.24	3040	751	-717	120	1719	431
13.2413	3038	747	-721	123	1707	426
13.2427	3031	745	-721	118	1714	426
13.244	3012	731	-736	107	1706	421
13.2453	3002	711	-762	98	1698	406
13.2467	3000	707	-784	88	1695	390
13.248	2984	690	-813	73	1676	377
13.2493	2975	685	-817	68	1667	378
13.2507	2994	705	-787	80	1678	393
13.252	2989	686	-787	71	1667	375
13.2533	2978	665	-805	65	1652	355
13.2547	2992	684	-796	76	1659	379
13.256	3009	697	-782	82	1668	398
13.2573	3017	698	-785	88	1673	397
13.2587	3001	690	-791	89	1669	382
13.26	2996	679	-800	85	1662	371
13.2613	3003	678	-817	86	1668	378
13.2627	2993	673	-820	89	1681	380
13.264	2978	668	-821	90	1681	382
13.2653	2968	658	-837	86	1672	374
13.2667	2960	651	-850	78	1661	366
13.268	2954	640	-863	74	1642	359
13.2693	2959	636	-855	78	1637	366
13.2707	2957	621	-851	74	1636	372
13.272	2958	611	-859	75	1633	364
13.2733	2958	603	-878	73	1616	351
13.2747	2953	592	-897	66	1601	341
13.276	2942	589	-900	69	1599	334
13.2773	2940	580	-904	71	1591	324
13.2787	2954	574	-907	81	1584	325
13.28	2951	571	-925	73	1576	329
13.2813	2946	569	-934	50	1575	338
13.2827	2945	565	-938	44	1569	346
13.284	2937	554	-956	49	1555	340
13.2853	2936	556	-967	63	1559	335
13.2867	2934	551	-985	63	1553	332
13.288	2929	533	-998	59	1537	329
13.2893	2932	527	-1001	58	1528	323
13.2907	2931	523	-1019	45	1512	304
13.292	2926	521	-1028	44	1497	290
13.2933	2916	514	-1032	52	1491	285
13.2947	2912	504	-1043	57	1485	278
13.296	2918	495	-1052	54	1479	276
13.2973	2908	482	-1073	43	1464	270
13.2987	2908	474	-1086	36	1450	273
13.3	2926	472	-1090	33	1452	283
13.3013	2933	478	-1101	36	1459	289
13.3027	2926	476	-1123	38	1446	278
13.304	2921	468	-1141	32	1423	256
13.3053	2920	464	-1143	19	1409	247
13.3067	2922	457	-1147	25	1404	248
13.308	2920	445	-1158	25	1407	252
13.3093	2918	424	-1171	10	1407	247
13.3107	2924	421	-1173	19	1412	238
13.312	2929	437	-1169	29	1418	244
13.3133	2949	444	-1166	27	1425	254
13.3147	2958	446	-1168	27	1428	265
13.316	2954	443	-1187	27	1423	265
13.3173	2961	433	-1200	16	1421	247
13.3187	2957	415	-1207	-3	1416	228
13.32	2955	403	-1217	-15	1418	217
13.3213	2961	412	-1219	-10	1427	221
13.3227	2955	419	-1226	-13	1429	212
13.324	2953	414	-1244	-16	1426	212
13.3253	2963	412	-1246	-7	1433	224
13.3267	2971	419	-1237	-6	1444	220
13.328	2978	426	-1234	-2	1451	218
13.3293	2973	426	-1232	-16	1455	215
13.3307	2970	419	-1234	-40	1459	212
13.332	2970	412	-1239	-45	1463	214
13.3333	2965	410	-1236	-39	1462	209
13.3347	2959	405	-1237	-43	1460	204
13.336	2974	408	-1235	-41	1473	210
13.3373	2993	408	-1229	-29	1487	214
13.3387	2999	410	-1230	-27	1490	217
13.34	3007	425	-1215	-8	1502	233
13.3413	3015	432	-1192	-1	1518	242
13.3427	3021	433	-1175	-7	1530	246
13.344	3024	430	-1176	-14	1536	243
13.3453	3025	424	-1179	-22	1548	226
13.3467	3029	422	-1174	-24	1564	216
13.348	3040	442	-1148	-14	1597	229
13.3493	3058	464	-1120	-4	1636	246
13.3507	3074	469	-1108	-1	1660	238
13.352	3079	478	-1088	6	1681	239
13.3533	3086	494	-1070	1	1708	255
13.3547	3101	513	-1045	-2	1740	265
13.356	3114	529	-1013	-3	1773	277
13.3573	3125	542	-979	-3	1803	285
13.3587	3135	551	-945	4	1830	290
13.36	3141	539	-924	2	1852	290
13.3613	3149	534	-904	-6	1876	285
13.3627	3157	539	-870	-4	1907	288
13.364	3167	555	-832	2	1943	303
13.3653	3179	575	-801	5	1975	322
13.3667	3192	579	-784	1	2010	319
13.368	3214	594	-758	4	2065	315
13.3693	3229	621	-722	9	2111	326
13.3707	3232	640	-696	3	2137	329
13.372	3225	651	-673	0	2157	326
13.3733	3217	643	-660	-10	2171	309
13.3747	3208	628	-649	-25	2188	295
13.376	3202	633	-633	-39	2202	297
13.3773	3205	642	-605	-50	2223	300
13.3787	3199	635	-580	-60	2234	300
13.38	3188	624	-569	-68	2235	290
13.3813	3182	629	-562	-62	2251	285
13.3827	3188	634	-549	-50	2274	303
13.384	3195	644	-525	-43	2293	323
13.3853	3185	647	-521	-43	2297	323
13.3867	3172	646	-525	-48	2291	323
13.388	3160	658	-514	-54	2286	321
13.3893	3159	669	-495	-43	2288	322
13.3907	3149	660	-491	-46	2291	319
13.392	3130	647	-501	-61	2287	307
13.3933	3133	662	-488	-63	2287	301
13.3947	3140	664	-477	-63	2282	290
13.396	3118	654	-494	-65	2261	277
13.3973	3104	656	-512	-57	2257	286
13.3987	3108	657	-520	-51	2260	294
13.4	3109	670	-520	-51	2254	300
13.4013	3115	672	-522	-50	2249	304
13.4027	3111	661	-528	-54	2237	291
13.404	3099	650	-531	-60	2220	276
13.4053	3099	649	-535	-54	2219	274
13.4067	3105	658	-528	-43	2212	277
13.408	3107	659	-521	-32	2208	274
13.4093	3103	659	-516	-27	2201	284
13.4107	3093	654	-521	-28	2173	300
13.412	3080	647	-536	-24	2156	297
13.4133	3068	646	-544	-21	2151	293
13.4147	3058	645	-551	-14	2147	285
13.416	3048	640	-551	-7	2144	286
13.4173	3037	627	-559	-9	2133	285
13.4187	3036	628	-559	-4	2129	271
13.42	3039	639	-552	1	2127	264
13.4213	3025	633	-564	-14	2113	262
13.4227	3012	629	-572	-17	2094	267
13.424	3014	627	-568	-4	2084	274
13.4253	3017	618	-565	9	2095	282
13.4267	3014	622	-566	15	2092	285
13.428	3011	630	-560	23	2077	287
13.4293	2995	617	-563	26	2059	292
13.4307	2966	593	-578	28	2030	284
13.432	2945	581	-593	29	2018	284
13.4333	2946	574	-602	30	2020	296
13.4347	2932	564	-616	22	1998	279
13.436	2918	569	-619	21	1974	267
13.4373	2927	575	-607	32	1970	282
13.4387	2939	571	-605	26	1973	296
13.44	2942	566	-615	29	1973	299
13.4413	2932	562	-627	49	1967	296
13.4427	2929	568	-626	73	1967	298
13.444	2932	582	-621	87	1966	304
13.4453	2920	580	-634	80	1945	297
13.4467	2916	571	-640	76	1926	303
13.448	2942	572	-638	83	1927	317
13.4493	2944	569	-644	86	1920	309
13.4507	2928	563	-636	93	1912	308
13.452	2931	557	-623	111	1915	324
13.4533	2939	557	-618	117	1906	335
13.4547	2934	551	-617	112	1882	331
13.456	2915	523	-629	103	1863	317
13.4573	2906	509	-636	90	1860	321
13.4587	2905	505	-640	85	1855	328
13.46	2897	510	-650	93	1846	321
13.4613	2894	516	-659	101	1838	313
13.4627	2873	508	-669	102	1835	305
13.464	2865	513	-678	100	1841	302
13.4653	2887	518	-680	105	1847	313
13.4667	2881	510	-672	95	1840	322
13.468	2864	500	-680	83	1820	320
13.4693	2862	501	-686	102	1813	319
13.4707	2863	506	-679	134	1810	323
13.472	2869	503	-675	148	1798	335
13.4733	2860	490	-676	134	1782	334
13.4747	2854	487	-677	130	1782	326
13.476	2870	503	-675	142	1799	336
13.4773	2888	517	-666	148	1812	358
13.4787	2895	517	-662	152	1822	366
13.48	2888	512	-661	147	1814	356
13.4813	2882	510	-659	139	1809	345
13.4827	2888	504	-661	146	1810	343
13.484	2890	491	-670	158	1801	334
13.4853	2883	482	-686	156	1787	329
13.4867	2879	484	-684	152	1786	340
13.488	2873	487	-685	158	1785	343
13.4893	2877	498	-685	170	1788	356
13.4907	2884	500	-673	180	1799	353
13.492	2880	487	-681	176	1794	341
13.4933	2879	488	-679	170	1786	349
13.4947	2879	487	-685	171	1779	339
13.496	2869	479	-689	165	1772	325
13.4973	2869	478	-680	163	1777	328
13.4987	2880	488	-684	174	1783	349
13.5	2894	502	-685	182	1787	358
13.5013	2907	504	-685	189	1794	352
13.5027	2913	508	-693	197	1786	349
13.504	2911	519	-689	203	1772	342
13.5053	2896	515	-693	199	1760	334
13.5067	2896	515	-696	199	1753	329
13.508	2897	517	-691	206	1758	333
13.5093	2904	512	-684	209	1772	352
13.5107	2911	503	-681	192	1764	359
13.512	2901	497	-687	182	1752	360
13.5133	2884	495	-697	186	1742	361
13.5147	2867	485	-711	188	1730	351
13.516	2874	484	-719	198	1730	343
13.5173	2880	490	-722	198	1726	330
13.5187	2870	495	-732	189	1717	321
13.52	2868	490	-741	187	1703	327
13.5213	2884	493	-737	199	1709	353
13.5227	2906	497	-735	218	1721	367
13.524	2922	492	-741	226	1710	356
13.5253	2933	498	-743	233	1701	350
13.5267	2933	499	-739	251	1699	358
13.528	2936	505	-733	267	1694	369
13.5293	2943	515	-736	267	1693	371
13.5307	2949	507	-740	261	1692	373
13.532	2947	500	-754	248	1684	370
13.5333	2939	501	-767	241	1665	357
13.5347	2938	501	-768	251	1652	365
13.536	2946	502	-763	254	1650	384
13.5373	2953	509	-770	259	1643	382
13.5387	2957	505	-787	260	1644	375
13.54	2947	490	-805	228	1636	359
13.5413	2953	495	-806	213	1617	349
13.5427	2973	510	-801	224	1610	362
13.544	2978	516	-809	225	1609	374
13.5453	2976	508	-815	224	1606	377
13.5467	2968	498	-823	226	1599	372
13.548	2964	494	-840	219	1581	364
13.5493	2978	496	-850	221	1573	367
13.5507	2992	507	-846	232	1578	376
13.552	2992	509	-838	234	1587	377
13.5533	2988	486	-840	221	1585	363
13.5547	2989	476	-840	212	1581	352
13.556	3002	492	-822	213	1597	355
13.5573	2999	496	-810	208	1605	356
13.5587	2993	502	-803	222	1604	365
13.56	3004	507	-797	234	1613	375
13.5613	3004	499	-805	228	1609	376
13.5627	3002	496	-804	236	1607	383
13.564	3005	495	-795	241	1629	381
13.5653	3010	504	-788	240	1653	375
13.5667	3017	508	-764	249	1674	377
13.568	3020	504	-750	244	1679	369
13.5693	3020	508	-754	244	1675	363
13.5707	3020	514	-748	258	1681	370
13.572	3013	514	-751	257	1689	376
13.5733	3009	506	-758	252	1691	368
13.5747	3013	506	-750	253	1687	361
13.576	3008	508	-746	247	1677	358
13.5773	3003	487	-757	244	1676	357
13.5787	2994	462	-767	238	1683	357
13.58	2984	458	-778	225	1683	350
13.5813	2976	457	-791	214	1669	344
13.5827	2962	437	-795	203	1651	331
13.584	2962	428	-790	211	1664	321
13.5853	2971	446	-779	234	1691	328
13.5867	2965	445	-784	233	1683	328
13.588	2940	430	-787	228	1662	318
13.5893	2934	430	-777	234	1664	317
13.5907	2949	437	-777	234	1665	328
13.592	2954	438	-779	238	1660	327
13.5933	2954	436	-780	238	1648	312
13.5947	2949	422	-796	235	1640	313
13.596	2951	405	-806	236	1641	319
13.5973	2955	408	-808	242	1642	325
13.5987	2957	412	-808	257	1651	331
13.6	2959	410	-806	262	1650	337
13.6013	2956	404	-817	261	1643	332
13.6027	2958	396	-818	260	1645	324
13.604	2958	396	-808	256	1637	317
13.6053	2943	390	-812	251	1619	311
13.6067	2943	389	-820	247	1620	314
13.608	2963	389	-828	247	1620	318
13.6093	2965	378	-834	251	1613	319
13.6107	2970	385	-822	259	1622	329
13.612	2970	396	-816	264	1632	339
13.6133	2955	389	-828	256	1626	333
13.6147	2944	379	-846	244	1609	319
13.616	2933	368	-864	243	1599	304
13.6173	2926	360	-873	249	1592	299
13.6187	2932	353	-877	250	1580	307
13.62	2947	363	-867	258	1581	317
13.6213	2956	369	-853	274	1602	327
13.6227	2965	361	-851	284	1617	329
13.624	2972	360	-864	279	1610	324
13.6253	2961	343	-880	261	1594	312
13.6267	2951	329	-897	251	1582	307
13.628	2954	331	-910	251	1573	312
13.6293	2954	331	-905	253	1577	313
13.6307	2956	325	-909	262	1581	309
13.632	2955	320	-923	268	1570	303
13.6333	2953	316	-923	272	1551	296
13.6347	2963	315	-913	275	1544	302
13.636	2971	323	-913	273	1552	315
13.6373	2976	327	-914	266	1558	315
13.6387	2986	323	-907	265	1571	321
13.64	2992	324	-910	267	1582	325
13.6413	3001	324	-919	262	1574	308
13.6427	2998	322	-917	260	1559	285
13.644	2989	328	-908	256	1560	288
13.6453	2996	338	-910	249	1569	298
13.6467	3007	352	-916	258	1584	309
13.648	3004	357	-913	268	1592	312
13.6493	3002	356	-910	262	1600	307
13.6507	3010	364	-905	259	1605	305
13.652	3034	380	-887	271	1610	310
13.6533	3036	373	-884	276	1609	314
13.6547	3018	357	-898	258	1598	310
13.656	3014	340	-915	237	1592	297
13.6573	3007	322	-928	229	1590	288
13.6587	3012	326	-923	237	1591	288
13.66	3034	346	-897	255	1614	294
13.6613	3038	357	-898	258	1627	291
13.6627	3039	362	-903	252	1624	287
13.664	3051	368	-898	257	1627	296
13.6653	3065	367	-909	260	1620	296
13.6667	3070	360	-922	254	1607	285
13.668	3064	350	-932	252	1603	279
13.6693	3065	354	-940	250	1608	276
13.6707	3071	359	-947	251	1607	289
13.672	3068	353	-956	251	1595	290
13.6733	3068	347	-959	241	1590	284
13.6747	3068	349	-961	231	1585	287
13.676	3064	352	-970	223	1577	289
13.6773	3078	353	-964	224	1579	290
13.6787	3094	350	-960	229	1580	286
13.68	3093	350	-970	238	1577	284
13.6813	3088	348	-979	242	1565	281
13.6827	3095	358	-977	246	1563	277
13.684	3095	359	-983	252	1573	279
13.6853	3095	345	-986	247	1577	277
13.6867	3111	356	-967	255	1583	284
13.688	3117	356	-968	266	1572	290
13.6893	3119	343	-984	258	1557	285
13.6907	3117	346	-995	246	1546	283
13.692	3118	354	-999	247	1542	288
13.6933	3128	358	-998	248	1538	300
13.6947	3131	346	-1009	241	1523	295
13.696	3131	340	-1017	246	1519	282
13.6973	3143	361	-1004	263	1538	297
13.6987	3160	374	-994	279	1552	313
13.7	3162	369	-999	280	1541	313
13.7013	3151	376	-1008	268	1531	306
13.7027	3153	382	-1020	266	1531	296
13.704	3160	369	-1033	261	1515	283
13.7053	3165	364	-1051	250	1508	274
13.7067	3160	364	-1072	239	1511	276
13.708	3150	351	-1089	224	1500	282
13.7093	3159	354	-1086	228	1493	282
13.7107	3165	352	-1087	224	1483	270
13.712	3156	334	-1100	214	1469	256
13.7133	3163	332	-1105	213	1467	257
13.7147	3166	321	-1117	209	1469	256
13.716	3164	318	-1125	212	1467	260
13.7173	3176	326	-1133	217	1459	263
13.7187	3184	322	-1135	217	1450	260
13.72	3185	320	-1133	211	1450	271
13.7213	3190	325	-1139	212	1444	280
13.7227	3199	318	-1135	219	1433	270
13.724	3209	320	-1136	228	1433	268
13.7253	3209	312	-1164	228	1435	268
13.7267	3209	290	-1184	222	1440	269
13.728	3212	274	-1194	209	1439	266
13.7293	3208	266	-1204	203	1425	258
13.7307	3203	253	-1219	195	1400	250
13.732	3208	239	-1222	198	1382	252
13.7333	3218	245	-1215	215	1380	262
13.7347	3222	246	-1224	212	1369	257
13.736	3228	248	-1229	203	1368	255
13.7373	3227	249	-1252	196	1368	260
13.7387	3233	245	-1265	200	1367	272
13.74	3252	242	-1266	203	1368	278
13.7413	3270	240	-1277	202	1359	272
13.7427	3281	247	-1274	216	1363	272
13.744	3284	243	-1282	216	1367	267
13.7453	3286	235	-1308	203	1358	257
13.7467	3286	238	-1324	188	1355	255
13.748	3290	233	-1322	185	1356	258
13.7493	3309	233	-1318	189	1368	269
13.7507	3330	248	-1312	196	1381	283
13.752	3334	254	-1319	203	1379	286
13.7533	3344	255	-1328	201	1376	281
13.7547	3358	259	-1328	195	1373	285
13.756	3360	258	-1327	191	1373	287
13.7573	3370	257	-1330	200	1388	292
13.7587	3380	252	-1332	207	1398	296
13.76	3376	245	-1329	202	1396	286
13.7613	3388	252	-1337	202	1400	284
13.7627	3420	265	-1339	199	1417	288
13.764	3430	253	-1353	186	1413	271
13.7653	3426	239	-1375	178	1403	248
13.7667	3440	246	-1367	183	1417	257
13.768	3457	254	-1352	186	1423	276
13.7693	3474	261	-1345	176	1425	290
13.7707	3494	261	-1341	178	1434	295
13.772	3507	251	-1350	179	1436	295
13.7733	3531	251	-1358	170	1441	292
13.7747	3535	253	-1378	152	1435	279
13.776	3550	264	-1387	159	1433	291
13.7773	3575	270	-1390	174	1427	302
13.7787	3582	260	-1404	162	1406	293
13.78	3581	265	-1420	152	1405	287
13.7813	3587	266	-1439	147	1405	292
13.7827	3602	266	-1448	143	1392	300
13.784	3626	278	-1434	145	1389	312
13.7853	3668	289	-1427	149	1396	329
13.7867	3689	301	-1443	145	1390	325
13.788	3702	308	-1458	141	1380	317
13.7893	3723	302	-1469	138	1378	315
13.7907	3737	300	-1479	130	1381	319
13.792	3766	306	-1489	129	1376	322
13.7933	3798	320	-1502	127	1361	318
13.7947	3828	337	-1490	138	1368	322
13.796	3851	334	-1477	134	1375	319
13.7973	3870	336	-1471	113	1391	322
13.7987	3890	343	-1463	104	1405	325
13.8	3916	349	-1447	107	1421	336
13.8013	3938	363	-1438	104	1447	348
13.8027	3966	373	-1427	98	1477	343
13.804	4009	395	-1401	111	1524	349
13.8053	4042	413	-1376	111	1553	349
13.8067	4059	423	-1342	104	1577	349
13.808	4072	439	-1310	110	1620	364
13.8093	4084	448	-1289	122	1660	367
13.8107	4097	454	-1271	127	1703	362
13.812	4110	457	-1243	127	1752	363
13.8133	4129	469	-1203	125	1794	367
13.8147	4159	500	-1153	137	1846	378
13.816	4170	514	-1112	149	1898	390
13.8173	4165	511	-1080	152	1942	402
13.8187	4169	515	-1035	165	1986	410
13.82	4177	527	-999	179	2037	415
13.8213	4177	526	-985	186	2070	412
13.8227	4171	518	-961	190	2095	404
13.824	4166	515	-939	187	2129	406
13.8253	4156	511	-931	192	2152	415
13.8267	4144	511	-920	215	2172	425
13.828	4134	508	-904	224	2192	430
13.8293	4119	497	-902	221	2203	428
13.8307	4088	465	-914	212	2193	410
13.832	4060	448	-916	217	2188	400
13.8333	4051	447	-911	231	2191	407
13.8347	4041	427	-919	228	2179	402
13.836	4022	414	-931	229	2165	412
13.8373	3993	396	-956	224	2133	412
13.8387	3970	377	-990	225	2103	397
13.84	3961	359	-1018	243	2080	402
13.8413	3940	329	-1064	254	2036	395
13.8427	3914	309	-1107	262	1988	384
13.844	3884	282	-1151	261	1936	377
13.8453	3851	246	-1204	260	1870	372
13.8467	3826	203	-1267	256	1819	369
13.848	3800	161	-1347	251	1769	365
13.8493	3777	128	-1423	249	1699	368
13.8507	3754	88	-1494	252	1608	370
13.852	3723	45	-1576	257	1511	367
13.8533	3676	4	-1665	260	1418	369
13.8547	3643	-42	-1764	277	1326	380
13.856	3620	-86	-1881	280	1218	374
13.8573	3595	-125	-2005	285	1104	363
13.8587	3565	-187	-2139	292	989	343
13.86	3523	-269	-2282	276	850	326
13.8613	3482	-343	-2438	269	706	327
13.8627	3449	-410	-2606	274	559	322
13.864	3423	-476	-2777	271	407	320
13.8653	3398	-531	-2939	261	255	313
13.8667	3389	-586	-3098	253	92	301
13.868	3401	-655	-3272	246	-69	286
13.8693	3402	-727	-3453	241	-208	272
13.8707	3405	-781	-3611	242	-337	281
13.872	3413	-832	-3772	227	-473	280
13.8733	3430	-873	-3923	225	-597	279
13.8747	3462	-911	-4062	226	-706	283
13.876	3503	-947	-4193	214	-799	284
13.8773	3569	-955	-4299	218	-858	302
13.8787	3653	-956	-4391	218	-885	319
13.88	3746	-946	-4467	213	-882	336
13.8813	3857	-911	-4518	213	-860	369
13.8827	3993	-865	-4538	212	-822	411
13.884	4153	-811	-4528	215	-745	452
13.8853	4315	-749	-4489	209	-632	473
13.8867	4483	-669	-4430	197	-501	491
13.888	4679	-554	-4328	198	-319	530
13.8893	4899	-423	-4187	196	-89	573
13.8907	5119	-289	-4031	188	165	610
13.892	5334	-144	-3830	180	452	639
13.8933	5539	4	-3598	161	760	662
13.8947	5743	150	-3358	131	1079	684
13.896	5950	311	-3084	104	1435	706
13.8973	6157	494	-2769	93	1824	733
13.8987	6342	654	-2445	77	2216	750
13.9	6506	799	-2116	48	2622	756
13.9013	6658	945	-1775	28	3020	761
13.9027	6794	1070	-1448	18	3405	763
13.904	6898	1178	-1146	14	3772	755
13.9053	6959	1273	-858	20	4103	742
13.9067	7001	1345	-593	24	4392	724
13.908	7019	1395	-353	19	4642	712
13.9093	7009	1429	-155	18	4856	705
13.9107	6983	1440	2	22	5020	688
13.912	6919	1436	129	37	5144	682
13.9133	6819	1408	208	68	5210	679
13.9147	6704	1361	238	100	5211	655
13.916	6578	1299	233	124	5162	628
13.9173	6444	1229	189	146	5058	611
13.9187	6299	1148	96	160	4917	588
13.92	6155	1040	-23	185	4747	555
13.9213	6018	928	-162	218	4563	535
13.9227	5868	805	-346	242	4329	512
13.924	5704	680	-568	260	4055	479
13.9253	5531	546	-802	277	3775	453
13.9267	5345	396	-1053	301	3457	424
13.928	5180	244	-1336	326	3112	394
13.9293	5042	85	-1624	371	2775	371
13.9307	4884	-87	-1939	411	2409	338
13.932	4708	-274	-2291	437	2017	288
13.9333	4529	-471	-2668	454	1606	237
13.9347	4365	-674	-3066	482	1172	188
13.936	4197	-897	-3493	522	721	131
13.9373	4012	-1149	-3957	560	244	67
13.9387	3833	-1412	-4449	600	-260	1
13.94	3649	-1690	-4985	633	-803	-69
13.9413	3460	-1982	-5576	681	-1372	-135
13.9427	3255	-2302	-6203	742	-1968	-194
13.944	3037	-2656	-6869	806	-2620	-263
13.9453	2815	-3039	-7599	868	-3324	-356
13.9467	2588	-3447	-8401	936	-4077	-445
13.948	2349	-3897	-9268	1024	-4882	-539
13.9493	2108	-4381	-10200	1147	-5735	-646
13.9507	1848	-4898	-11213	1272	-6665	-746
13.952	1569	-5469	-12319	1389	-7681	-849
13.9533	1299	-6078	-13502	1543	-8762	-941
13.9547	1007	-6740	-14790	1721	-9932	-1041
13.956	679	-7462	-16209	1903	-11222	-1156
13.9573	334	-8248	-17744	2087	-12625	-1279
13.9587	-21	-9095	-19395	2300	-14109	-1380
13.96	-397	-10003	-21195	2526	-15704	-1484
13.9613	-789	-10986	-23150	2760	-17440	-1612
13.9627	-1185	-12033	-25244	3021	-19284	-1730
13.964	-1579	-13139	-27477	3310	-21247	-1839
13.9653	-1964	-14310	-29857	3628	-23347	-1949
13.9667	-2331	-15539	-32391	3968	-25568	-2059
13.968	-2688	-16825	-35076	4318	-27906	-2169
13.9693	-3032	-18172	-37921	4663	-30355	-2277
13.9707	-3342	-19566	-40916	5013	-32906	-2372
13.972	-3587	-20976	-44017	5395	-35528	-2445
13.9733	-3764	-22410	-47240	5782	-38203	-2505
13.9747	-3877	-23859	-50563	6160	-40918	-2550
13.976	-3911	-25302	-53935	6539	-43656	-2576
13.9773	-3856	-26720	-57342	6926	-46383	-2581
13.9787	-3703	-28095	-60767	7318	-49055	-2566
13.98	-3456	-29427	-64184	7708	-51640	-2518
13.9813	-3107	-30702	-67573	8073	-54119	-2448
13.9827	-2647	-31915	-70919	8408	-56494	-2360
13.984	-2062	-33048	-74155	8753	-58712	-2219
13.9853	-1341	-34053	-77251	9103	-60705	-2018
13.9867	-466	-34923	-80184	9443	-62457	-1758
13.988	557	-35663	-82904	9779	-63932	-1426
13.9893	1744	-36229	-85368	10120	-65083	-1013
13.9907	3131	-36597	-87526	10450	-65874	-516
13.992	4713	-36757	-89341	10764	-66258	70
13.9933	6484	-36687	-90775	11074	-66228	737
13.9947	8477	-36374	-91786	11343	-65727	1471
13.996	10707	-35764	-92318	11572	-64677	2292
13.9973	13153	-34839	-92331	11775	-63062	3195
13.9987	15837	-33618	-91789	11929	-60875	4171
14	18761	-32072	-90646	12038	-58065	5228

## Sheet: Fig2B
Lys uM	HPLC, 1	HPLC, 2	bioassay, 1	bioassay, 2
sample 1	18.38	20.04	22.2	14.8
sample 2	59.93	63.94	65.47	67.19
sample 3	21.29	23.01	22.85	16.91
sample 4	17.77	17.94	16.04	9.81
sample 5	79.39	71.88	60.93	55.71
sample 6	16.94	18.28	21.55	10.12
sample 7	64.39	57.8	68.71	49.97

## Sheet: Fig2C
Bolded columns are plotted.												supernatant									1:1 hyp+Inosine (total uM)
R.Time (min)	ade 16uM	ade 32uM	Hyp_8uM	Hyp_16uM	Hyp_32uM	Ino_8uM	Ino_16uM	Ino_32uM	HI_8uM	HI_16uM	HI_32uM	7-26_5_t1	7-26_5_t2	7-26_5_t3	7-26_7_t1	7-26_7_t2	7-26_7_t4		R.Time (min)	none	10uM	20uM	40uM
1.5	2153	-46	2457	8757	2170	2445	2554	1379	4880	2870	3145	6930	56471	73285	38270	66007	111938		1.5	0	9864	10560	15811
1.504	2081	-66	2013	8263	1906	2250	2396	1307	4493	2509	2829	6340	56101	72243	37058	64192	109574		1.504	0	9052	9739	14765
1.508	1985	-42	1614	7815	1704	2043	2216	1229	4096	2190	2525	5215	54634	69928	35436	61468	105332		1.508	0	8205	8874	13671
1.512	1872	12	1255	7413	1548	1841	2022	1148	3701	1922	2243	3606	52223	66572	33474	58030	99621		1.512	0	7337	7988	12585
1.516	1750	85	937	7064	1427	1656	1833	1071	3325	1704	1985	1585	49069	62455	31264	54095	92887		1.516	0	6464	7099	11573
1.52	1617	160	649	6769	1326	1491	1662	990	2975	1522	1742	-765	45373	57859	28885	49876	85566		1.52	0	5590	6207	10705
1.524	1482	228	384	6514	1227	1348	1505	910	2649	1365	1504	-3363	41337	53055	26406	45565	78055		1.524	0	4719	5319	10034
1.528	1335	280	123	6284	1107	1221	1368	828	2339	1212	1253	-6147	37145	48261	23884	41326	70684		1.528	0	3886	4472	9570
1.532	1192	318	-128	6083	959	1114	1251	747	2033	1057	979	-9057	32947	43683	21391	37304	63758		1.532	0	3113	3689	9229
1.536	1034	344	-371	5923	788	1007	1134	642	1714	874	662	-12036	28865	39494	18990	33647	57544		1.536	0	2396	2959	8865
1.54	865	356	-572	5820	616	921	1019	528	1384	684	328	-15016	25034	35904	16754	30487	52334		1.54	0	1717	2273	8361
1.544	689	365	-697	5845	501	863	929	411	1092	516	8	-17906	21610	33077	14748	27946	48346		1.544	0	1052	1612	7676
1.548	535	367	-703	6047	477	855	876	314	881	426	-250	-20600	18721	31112	13032	26062	45671		1.548	0	382	957	6829
1.552	426	373	-586	6470	575	894	874	256	799	443	-401	-22956	16438	29925	11624	24761	44126		1.552	0	-273	334	5917
1.556	398	386	-350	7133	793	975	934	278	890	592	-379	-24837	14744	29290	10534	23885	43319		1.556	0	-833	-189	5069
1.56	474	402	-18	7997	1093	1085	1054	415	1164	868	-152	-26099	13591	28937	9765	23249	42780		1.56	0	-1144	-428	4482
1.564	632	429	350	8959	1431	1183	1224	660	1580	1219	266	-26690	12913	28653	9321	22720	42089		1.564	0	-898	-116	4416
1.568	854	459	732	9877	1761	1283	1422	1007	2067	1613	856	-26655	12680	28454	9276	22301	41121		1.568	0	308	1214	5307
1.572	1018	442	1217	10595	2089	1417	1602	1335	2488	1954	1484	-26181	12938	28822	10102	22200	40088		1.572	0	3152	4107	7677
1.576	1084	327	2112	11211	2606	1686	1806	1581	2840	2278	2040	-25354	14667	31566	13237	23472	39905		1.576	0	8462	9366	12168
1.58	1355	169	3278	12224	3370	1938	2088	1882	3555	2762	2914	-22125	20989	39044	19556	28140	42727		1.58	0	16730	17145	19171
1.584	1956	107	4454	13633	4182	2195	2426	2344	4689	3435	4175	-12406	33418	50693	27683	36532	49014		1.584	0	25855	25178	27790
1.588	2673	203	4635	15058	4576	2237	2753	2813	6049	4080	5473	3255	49057	62240	34134	46417	56681		1.588	0	32280	30685	35421
1.592	4180	805	3142	16029	3846	1898	2896	3758	7551	4800	7430	20204	63015	68890	36059	55021	63852		1.592	0	34277	32071	39514
1.596	5476	1571	435	15466	2142	1207	2688	4417	8173	4854	8728	32607	69629	67847	33159	58983	66943		1.596	0	32263	29998	39792
1.6	5481	1960	-2616	12956	81	318	2083	4086	7137	3836	8094	34870	66671	60479	27329	56864	64346		1.6	0	28242	26363	37179
1.604	4740	2083	-4873	9472	-1662	-372	1293	3308	4990	2432	6251	28056	57203	50506	21133	50694	57782		1.604	0	23812	22434	33134
1.608	3538	1865	-5767	6350	-2225	-729	678	2269	2814	1158	3979	17085	45819	41265	16277	43102	49403		1.608	0	19869	19051	28974
1.612	2375	1392	-4882	4376	-1147	-581	360	1353	1386	607	2278	5814	36262	35003	13573	36090	41478		1.612	0	16925	16619	25295
1.616	1212	716	-2064	3839	2585	-42	346	480	948	908	1394	-3800	30227	32276	12862	30735	34912		1.616	0	15019	15425	22274
1.62	77	-257	3603	5020	10556	1048	634	-313	1704	2725	1983	-11510	27807	33839	14158	27321	30387		1.62	0	14401	15927	19917
1.624	-1211	-1637	12880	8905	26321	2468	1196	-1198	4294	6834	4948	-17608	28785	40320	17229	25973	28170		1.624	0	15727	19727	18580
1.628	-2464	-3353	27642	16918	54544	4004	1926	-2009	9630	15349	12930	-22492	33077	54171	22447	26960	29455		1.628	0	20790	29376	18962
1.632	-3517	-5067	49658	32120	104195	5169	2588	-2656	19534	30877	29552	-26302	42014	78584	30342	31638	36031		1.632	0	32156	50659	22864
1.636	-4048	-6285	81821	57882	184100	5463	2957	-2942	36015	58209	62019	-28751	57996	119179	42279	42206	52049		1.636	0	54804	90829	33004
1.64	-3738	-6492	125616	99613	306135	4892	2886	-2630	62146	101931	118239	-28726	85498	179347	59563	62919	82360		1.64	0	93083	160709	55537
1.644	-2796	-5596	180285	160880	474878	3483	2406	-1961	99637	167270	208931	-25241	127379	258383	82873	97505	133694		1.644	0	151096	266177	98561
1.648	-1326	-3846	240789	244755	688429	1853	1704	-950	149081	255703	340701	-17139	184281	347620	111042	149918	210596		1.648	0	226799	406733	176381
1.652	133	-1743	297189	348027	929412	321	989	-7	207087	364307	517100	-4029	250843	430651	140141	219391	315953		1.652	0	311698	568539	301114
1.656	1401	198	340362	460668	1164823	-780	442	804	266179	482919	730214	14473	316134	492931	165481	299906	445113		1.656	0	392980	726517	485294
1.66	2278	1694	362498	567171	1357826	-1420	107	1354	317511	594120	960078	37883	369084	523417	182082	380082	584767		1.66	0	455908	856314	727840
1.664	2785	2629	363294	647834	1469722	-1675	-28	1665	351816	681453	1177366	64974	400209	522810	188273	444815	715361		1.664	0	493215	936841	1015565
1.668	3013	3089	346170	692006	1491778	-1649	-17	1809	365789	730248	1344145	93070	408290	497318	184495	484760	812990		1.668	0	502315	964280	1319618
1.672	3046	3198	317485	695236	1433380	-1476	84	1825	359738	738442	1437188	117894	396326	456347	173422	495311	864826		1.672	0	488046	943378	1595115
1.676	2981	3086	283388	664966	1321230	-1201	232	1786	338644	710655	1445891	135990	370670	408297	158107	480816	866361		1.676	0	456965	887553	1799017
1.68	2841	2841	248100	612165	1182483	-878	394	1701	308405	658079	1384813	144596	337294	358674	141017	448582	827175		1.68	0	416005	810472	1893241
1.684	2672	2517	214447	547995	1036410	-509	562	1598	274152	592230	1276397	144061	300590	311131	123954	406549	761020		1.684	0	370824	723383	1881600
1.688	2471	2143	183497	481287	896013	-117	737	1467	239681	521879	1143551	136044	263638	267237	107788	361030	681366		1.688	0	325141	634792	1787217
1.692	2261	1734	155881	416837	766441	329	918	1331	206927	453247	1004590	123220	228169	228063	93081	315710	598708		1.692	0	281639	549525	1641810
1.696	2016	1293	131521	357569	650582	810	1107	1161	177047	389150	869698	107999	195491	193693	79953	272936	518717		1.696	0	241547	470974	1472157
1.7	1758	821	110452	304185	548188	1369	1321	987	150285	331284	745258	92023	166107	164310	68551	233631	444894		1.7	0	205796	400276	1295932
1.704	1455	303	92317	257123	459211	1971	1573	786	126797	279752	632974	76363	140430	139456	58744	198475	378171		1.704	0	174461	338291	1125595
1.708	1137	-256	76926	215952	382302	2618	1857	592	106355	234703	533872	61496	118299	118875	50474	167462	319192		1.708	0	147635	284612	966845
1.712	786	-855	63813	180524	316786	3237	2157	393	88844	195587	447079	47753	99565	101965	43467	140679	267511		1.712	0	124847	239016	823657
1.716	457	-1465	52682	150214	261156	3777	2464	252	73927	162177	372293	35259	83757	88521	37506	117763	223058		1.716	0	105768	200522	696380
1.72	191	-1986	43172	124719	214579	4219	2814	213	61426	133838	308258	24242	70629	78288	32348	98502	185140		1.72	0	89809	168573	585537
1.724	35	-2330	35092	103361	175657	4615	3271	359	51019	110241	254365	14742	59874	71554	27881	82385	153404		1.724	0	76624	142217	489685
1.728	22	-2419	28260	85717	143552	5077	3968	770	42543	90752	209318	6863	51519	68474	24055	69094	127031		1.728	0	65794	121055	408136
1.732	122	-2255	22584	71140	117083	5735	5020	1502	35738	74971	172320	468	45497	69842	20903	58209	105442		1.732	0	57206	104450	338976
1.736	317	-1886	17945	59217	95533	6734	6608	2617	30495	62347	142135	-4576	42051	76322	18470	49575	87828		1.736	0	50673	92318	281086
1.74	538	-1398	14240	49430	77968	8203	8825	4204	26603	52528	117991	-8561	41210	90093	16807	42973	73632		1.74	0	46285	84330	232635
1.744	769	-889	11330	41472	63796	10201	11847	6343	23974	45078	98887	-11744	43413	113166	15892	38431	62241		1.744	0	43981	80700	192540
1.748	957	-434	9096	34976	52317	12800	15703	9178	22439	39767	84250	-14375	48943	149647	15717	35827	53308		1.748	0	44068	81375	159384
1.752	1096	-80	7395	29723	43089	15995	20504	12778	21918	36262	73352	-16607	59053	200867	16212	35284	46445		1.752	0	46719	87133	132434
1.756	1192	163	6135	25454	35624	19856	26227	17328	22263	34409	65852	-18530	74910	266722	17387	36746	41507		1.756	0	52744	98515	110737
1.76	1243	290	5206	22015	29630	24385	32964	22842	23408	33946	61229	-20180	99124	341383	19206	40442	38212		1.76	0	62705	117459	93923
1.764	1258	324	4554	19234	24778	29768	40710	29427	25219	34749	59266	-21571	132727	414018	21801	46463	36463		1.764	0	77915	145190	81417
1.768	1249	285	4104	16998	20878	36122	49628	37031	27637	36584	59549	-22681	176351	474357	25236	55513	36043		1.768	0	98847	184213	73136
1.772	1230	192	3820	15183	17720	43771	59832	45642	30572	39318	61874	-23527	227054	511113	29736	68220	36854		1.772	0	126015	234769	68752
1.776	1187	60	3654	13718	15170	52857	71689	55115	34006	42740	65850	-24113	278817	522125	35333	86304	38682		1.776	0	158422	296557	68322
1.78	1140	-90	3590	12532	13104	63617	85391	65343	37916	46703	71200	-24474	325133	508475	42066	110903	41399		1.78	0	194188	366512	71602
1.784	1086	-254	3594	11571	11445	75912	101253	76159	42318	51033	77546	-24623	358042	477135	49686	143608	44800		1.784	0	230685	439487	78618
1.788	1032	-419	3660	10786	10093	89430	119169	87417	47184	55581	84531	-24597	374630	435943	57755	183911	48704		1.788	0	264377	509986	89083
1.792	977	-579	3778	10150	8999	103556	138790	98953	52481	60224	91817	-24426	373573	391220	65727	229788	52920		1.792	0	292803	570888	102929
1.796	917	-736	3942	9624	8109	117371	159351	110592	58081	64826	99047	-24156	358254	347690	72876	277294	57273		1.796	0	313242	618163	119817
1.8	845	-886	4127	9188	7389	130066	179655	122170	63772	69278	105964	-23837	333084	307042	78723	320524	61621		1.8	0	325002	647300	139519
1.804	772	-1025	4334	8823	6800	140672	198625	133451	69324	73471	112304	-23497	302754	269958	82782	355117	65844		1.804	0	327474	658034	161469
1.808	686	-1149	4548	8506	6322	148798	215009	144257	74430	77342	117980	-23168	271327	235896	85042	376717	69891		1.808	0	321691	650326	184899
1.812	595	-1263	4775	8223	5937	154195	228392	154445	78934	80874	122964	-22862	241066	204450	85622	385062	73808		1.812	0	308809	627181	208752
1.816	490	-1363	5009	7984	5649	157296	238717	164160	82761	84190	127435	-22560	213549	175139	84980	381234	77757		1.816	0	290750	591957	231607
1.82	391	-1451	5285	7801	5448	158909	246931	174039	86112	87663	131871	-22222	189081	147728	83867	368917	82249		1.82	0	269502	548980	252437
1.824	293	-1544	5607	7683	5331	160313	255030	185362	89534	91921	137032	-21715	167773	121536	83237	352876	88154		1.824	0	247011	502796	270475
1.828	186	-1672	6074	7620	5307	164111	266511	201871	94033	98856	144882	-20830	148548	96492	85023	336538	98365		1.828	0	225392	457299	286159
1.832	-72	-2013	6791	7511	5403	174352	290858	232475	102639	112833	159469	-19055	128865	72939	91388	317758	119700		1.832	0	206621	417513	301190
1.836	-821	-3024	7975	7039	5624	198989	342940	309747	121436	150988	199235	-15095	106503	50761	102732	290572	177012		1.836	0	194957	389410	319620
1.84	-2862	-5436	8949	5754	6050	240501	443093	485468	165105	242448	307773	-2970	80185	29065	111896	250217	307291		1.84	0	195622	384356	359394
1.844	-5105	-8291	8043	4650	6383	287712	580521	830225	243530	428453	586726	28818	50484	8402	108803	199230	533895		1.844	0	209617	401972	472547
1.848	-5435	-8716	4272	5518	5894	319148	701943	1320732	342323	681091	1081789	87430	21479	-9530	92209	146042	787647		1.848	0	225662	421835	788226
1.852	-3126	-5612	-1817	8184	4264	317209	757545	1792733	422034	896269	1854465	153830	-1448	-21798	67395	99677	950110		1.852	0	228660	421433	1409551
1.856	1446	-74	-7735	10986	1553	286143	726718	2032029	446739	996682	2472312	197098	-14126	-26004	43777	66917	976180		1.856	0	214347	390286	2426090
1.86	5522	5293	-11033	12265	-1030	240150	635617	1953543	417891	959017	2493939	205212	-17064	-22598	27966	47603	884248		1.86	0	186936	337208	3315542
1.864	7349	7799	-10369	11512	-2062	193664	524753	1688753	357741	832830	2182375	182740	-13708	-14800	19776	37941	739257		1.864	0	155145	277942	3303169
1.868	7076	7380	-6311	9759	-1545	155070	420821	1378658	290912	683315	1783624	146095	-8294	-6536	16369	32956	596210		1.868	0	126277	223387	2727397
1.872	5737	5315	-818	8221	245	124889	335815	1096865	232844	546327	1410130	109315	-3745	-287	14861	29311	474306		1.872	0	102993	179271	2153546
1.876	4946	2701	4444	7457	2862	102085	268935	869704	186539	435591	1108121	77456	-1203	3234	14040	25413	377362		1.876	0	85808	145651	1668646
1.88	5611	410	7732	7578	5514	84036	216762	691301	150857	348289	873495	51458	-1128	3869	12943	20459	300025		1.88	0	73428	120766	1295085
1.884	9508	-543	8050	8266	7254	68682	174965	551624	122663	279771	693151	30115	-3240	2078	11133	14396	237507		1.884	0	64301	102114	1014847
1.888	18460	1791	5645	8971	7264	54613	140420	440287	99369	224807	552076	12530	-6727	-1191	8444	7748	186001		1.888	0	56864	87289	805474
1.892	35061	9637	1713	9206	5654	41509	111082	350546	79276	179880	440146	-1732	-10149	-4351	5090	1423	143907		1.892	0	50010	74531	645446
1.896	61710	25893	-2215	8742	3164	29879	86175	277419	61800	142567	349797	-12553	-11812	-5792	1693	-3471	110081		1.896	0	43409	63120	520232
1.9	101981	52927	-5192	7814	670	20271	65328	217735	46915	111496	276275	-20018	-11459	-5302	-1219	-6041	83625		1.9	0	37257	52913	419444
1.904	158980	94111	-6805	6818	-1149	12990	48522	168934	34856	85816	215979	-24374	-10020	-3861	-3132	-6123	63370		1.904	0	31784	44121	337072
1.908	235192	152921	-7183	6026	-2119	7938	35377	129357	25471	65027	166751	-26439	-8328	-2425	-3962	-4662	48222		1.908	0	27121	36727	268906
1.912	328081	235480	-6738	5555	-2365	4672	25473	97505	18486	48488	126764	-27170	-6892	-1341	-3948	-2553	37041		1.912	0	23240	30709	212705
1.916	429502	346733	-5896	5342	-2167	2708	18153	72405	13384	35685	94945	-27383	-5945	-745	-3408	-387	28993		1.916	0	20092	25888	166565
1.92	526563	490146	-4991	5282	-1774	1564	12844	52909	9731	25903	69979	-27577	-5475	-551	-2653	1334	23256		1.92	0	17562	22108	129405
1.924	603682	660525	-4200	5289	-1354	923	9022	38164	7120	18619	50914	-27897	-5223	-457	-1868	2465	19205		1.924	0	15529	19134	99874
1.928	650511	843998	-3596	5306	-1002	536	6312	27197	5265	13262	36595	-28319	-4981	-249	-1167	3170	16256		1.928	0	13838	16761	76927
1.932	661838	1019498	-3156	5319	-737	286	4401	19265	3949	9425	26151	-28755	-4703	128	-566	3665	14014		1.932	0	12374	14799	59309
1.936	641319	1161026	-2841	5310	-561	98	3057	13613	3015	6702	18659	-29156	-4397	606	-66	4038	12189		1.936	0	11039	13109	46002
1.94	596804	1249932	-2581	5289	-441	-39	2128	9676	2360	4815	13421	-29507	-4063	1141	364	4319	10657		1.94	0	9705	11512	35907
1.944	538076	1275744	-2329	5276	-332	-121	1521	6977	1928	3528	9815	-29805	-3716	1685	752	4516	9367		1.944	0	8196	9816	28104
1.948	473819	1243260	-2070	5286	-212	-145	1148	5161	1666	2672	7379	-30062	-3386	2200	1120	4621	8301		1.948	0	6226	7707	21625
1.952	410011	1165389	-1801	5320	-81	-120	941	3942	1529	2108	5739	-30284	-3092	2656	1467	4635	7436		1.952	0	3425	4803	15616
1.956	350493	1059067	-1529	5365	57	-59	845	3120	1477	1748	4627	-30485	-2848	3041	1788	4580	6750		1.956	0	-566	731	9323
1.96	296886	939871	-1265	5425	204	22	827	2560	1483	1524	3858	-30662	-2657	3350	2085	4488	6205		1.96	0	-5779	-4542	2448
1.964	249888	819316	-1014	5497	347	114	851	2174	1520	1392	3319	-30817	-2508	3592	2352	4372	5781		1.964	0	-11798	-10611	-4790
1.968	209284	705089	-788	5569	476	206	890	1900	1568	1315	2933	-30956	-2395	3777	2583	4233	5447		1.968	0	-17785	-16634	-11686
1.972	174738	600977	-592	5634	588	288	929	1707	1618	1269	2653	-31079	-2314	3917	2784	4093	5179		1.972	0	-22787	-21660	-17383
1.976	145611	508775	-422	5687	683	356	969	1562	1664	1242	2443	-31188	-2258	4027	2959	3966	4959		1.976	0	-26172	-25065	-21308
1.98	121342	428509	-277	5730	761	414	1004	1451	1699	1226	2283	-31276	-2215	4123	3112	3848	4783		1.98	0	-27709	-26619	-23271
1.984	101276	359726	-156	5764	824	465	1036	1363	1734	1210	2158	-31345	-2180	4212	3248	3755	4651		1.984	0	-27616	-26542	-23520
1.988	84860	301373	-51	5792	880	519	1070	1297	1775	1197	2063	-31397	-2145	4302	3372	3695	4555		1.988	0	-26275	-25218	-22460
1.992	71493	252429	45	5821	937	569	1101	1244	1812	1190	1983	-31430	-2108	4391	3482	3657	4485		1.992	0	-24113	-23070	-20533
1.996	60683	211675	131	5849	994	616	1131	1197	1840	1183	1911	-31456	-2072	4480	3582	3630	4433		1.996	0	-21494	-20463	-18120
2	51954	178043	204	5874	1046	658	1158	1155	1864	1173	1852	-31474	-2031	4572	3673	3614	4397		2	0	-18687	-17667	-15498
2.004	44908	150437	266	5900	1099	691	1181	1120	1886	1166	1800	-31482	-1987	4665	3759	3611	4374		2.004	0	-15893	-14883	-12860
2.008	39192	127896	319	5924	1146	720	1202	1086	1909	1164	1749	-31485	-1942	4759	3839	3616	4357		2.008	0	-13238	-12237	-10339
2.012	34523	109511	363	5943	1185	745	1216	1051	1931	1157	1698	-31489	-1893	4855	3913	3619	4343		2.012	0	-10809	-9814	-8025
2.016	30678	94539	406	5964	1224	764	1229	1020	1955	1152	1653	-31494	-1839	4959	3991	3624	4339		2.016	0	-8654	-7665	-5975
2.02	27489	82305	448	5992	1259	781	1244	996	1976	1155	1617	-31496	-1777	5077	4076	3641	4345		2.02	0	-6814	-5833	-4228
2.024	24807	72255	491	6020	1291	797	1260	975	1989	1163	1583	-31493	-1708	5195	4158	3667	4363		2.024	0	-5296	-4322	-2790
2.028	22519	63926	525	6040	1317	806	1267	953	1997	1166	1547	-31490	-1637	5304	4229	3694	4386		2.028	0	-4072	-3103	-1632
2.032	20544	56964	550	6059	1333	807	1262	924	1999	1163	1511	-31489	-1567	5406	4292	3732	4419		2.032	0	-3086	-2122	-697
2.036	18829	51082	579	6082	1346	804	1260	898	2002	1165	1481	-31478	-1501	5507	4352	3786	4465		2.036	0	-2280	-1324	61
2.04	17319	46059	603	6103	1356	796	1259	877	2003	1167	1455	-31460	-1443	5602	4405	3843	4517		2.04	0	-1632	-682	666
2.044	15974	41721	618	6118	1364	787	1252	855	1998	1163	1430	-31445	-1394	5687	4448	3891	4574		2.044	0	-1163	-223	1093
2.048	14778	37944	630	6128	1371	778	1243	835	1995	1159	1411	-31425	-1345	5771	4484	3936	4632		2.048	0	-956	-32	1255
2.052	13716	34629	644	6145	1378	772	1235	826	1997	1162	1399	-31395	-1295	5865	4519	3979	4684		2.052	0	-1147	-239	1017
2.056	12760	31690	656	6158	1381	768	1226	819	1997	1163	1390	-31374	-1251	5967	4552	4014	4721		2.056	0	-1923	-1024	203
2.06	11887	29066	663	6162	1379	756	1215	809	1994	1158	1379	-31367	-1214	6070	4581	4034	4744		2.06	0	-3416	-2517	-1310
2.064	11099	26715	668	6166	1377	744	1205	797	1990	1151	1373	-31362	-1168	6185	4617	4046	4759		2.064	0	-5615	-4716	-3528
2.068	10391	24601	673	6175	1385	744	1198	795	1994	1149	1375	-31360	-1107	6324	4663	4058	4774		2.068	0	-8283	-7385	-6226
2.072	9739	22693	682	6185	1393	745	1193	798	2000	1149	1377	-31363	-1041	6481	4709	4066	4790		2.072	0	-10984	-10083	-8954
2.076	9145	20969	695	6193	1397	743	1191	799	2006	1146	1382	-31370	-963	6657	4758	4076	4802		2.076	0	-13258	-12350	-11251
2.08	8602	19405	707	6194	1398	745	1186	800	2008	1140	1382	-31380	-869	6859	4816	4090	4811		2.08	0	-14746	-13827	-12761
2.084	8106	17987	718	6196	1401	751	1180	804	2012	1138	1385	-31389	-765	7080	4878	4103	4828		2.084	0	-15326	-14397	-13366
2.088	7652	16696	734	6201	1413	755	1180	805	2023	1139	1393	-31394	-646	7324	4943	4122	4856		2.088	0	-15072	-14138	-13141
2.092	7235	15518	752	6204	1428	761	1185	806	2033	1139	1395	-31395	-512	7606	5014	4145	4892		2.092	0	-14184	-13243	-12281
2.096	6850	14437	765	6205	1440	765	1188	804	2040	1136	1389	-31398	-373	7933	5086	4170	4929		2.096	0	-12869	-11917	-10992
2.1	6491	13447	773	6205	1455	767	1193	799	2050	1137	1385	-31405	-228	8315	5168	4203	4966		2.1	0	-11299	-10335	-9445
2.104	6161	12543	785	6212	1475	774	1206	797	2063	1141	1383	-31411	-67	8770	5268	4243	5011		2.104	0	-9592	-8624	-7763
2.108	5857	11705	798	6218	1490	780	1214	794	2073	1145	1381	-31422	113	9317	5384	4283	5066		2.108	0	-7843	-6874	-6037
2.112	5571	10930	805	6218	1501	784	1220	787	2084	1144	1373	-31432	317	9991	5518	4330	5138		2.112	0	-6127	-5158	-4340
2.116	5311	10222	809	6222	1520	789	1230	784	2099	1142	1367	-31433	566	10803	5687	4399	5233		2.116	0	-4505	-3537	-2730
2.12	5067	9565	806	6226	1537	787	1234	781	2108	1144	1361	-31432	857	11751	5885	4482	5340		2.12	0	-3023	-2056	-1255
2.124	4838	8955	800	6226	1548	782	1235	777	2113	1152	1358	-31430	1209	12817	6111	4573	5461		2.124	0	-1700	-735	63
2.128	4631	8392	788	6230	1559	780	1233	772	2117	1157	1357	-31424	1641	13970	6365	4673	5600		2.128	0	-547	416	1216
2.132	4438	7874	774	6235	1561	778	1227	761	2117	1157	1355	-31409	2166	15143	6636	4786	5759		2.132	0	442	1404	2213
2.136	4262	7396	757	6237	1561	775	1225	754	2117	1162	1357	-31380	2796	16250	6907	4920	5941		2.136	0	1280	2238	3063
2.14	4098	6956	730	6234	1558	765	1219	752	2116	1168	1363	-31343	3516	17212	7158	5073	6143		2.14	0	1989	2946	3792
2.144	3945	6548	704	6228	1548	754	1211	755	2112	1168	1369	-31296	4305	17940	7363	5251	6382		2.144	0	2592	3552	4422
2.148	3809	6174	680	6226	1538	749	1209	760	2107	1169	1384	-31244	5118	18389	7513	5463	6675		2.148	0	3106	4066	4963
2.152	3680	5826	653	6220	1519	740	1206	762	2097	1165	1401	-31190	5901	18522	7590	5714	7026		2.152	0	3544	4502	5425
2.156	3555	5503	623	6209	1489	729	1196	760	2081	1158	1412	-31121	6592	18351	7586	6027	7458		2.156	0	3911	4869	5814
2.16	3446	5206	598	6199	1463	723	1188	763	2070	1155	1426	-31032	7147	17906	7511	6425	8007		2.16	0	4219	5178	6140
2.164	3345	4931	575	6187	1435	719	1178	768	2058	1149	1436	-30931	7516	17243	7367	6914	8684		2.164	0	4474	5429	6407
2.168	3250	4674	554	6168	1402	709	1165	768	2040	1140	1440	-30815	7674	16416	7168	7496	9507		2.168	0	4679	5629	6621
2.172	3164	4439	523	6142	1366	691	1151	762	2020	1129	1437	-30664	7607	15489	6940	8169	10460		2.172	0	4844	5791	6789
2.176	3082	4227	489	6116	1328	673	1136	758	1998	1119	1432	-30469	7343	14519	6706	8904	11516		2.176	0	4983	5928	6919
2.18	3004	4035	461	6095	1296	657	1127	761	1980	1108	1430	-30228	6917	13555	6479	9657	12623		2.18	0	5088	6036	7014
2.184	2934	3861	439	6078	1270	645	1120	765	1968	1098	1429	-29936	6370	12636	6265	10373	13703		2.184	0	5166	6116	7082
2.188	2871	3697	416	6059	1242	633	1108	767	1957	1090	1422	-29601	5740	11775	6074	10984	14671		2.188	0	5227	6176	7126
2.192	2809	3541	389	6036	1212	621	1097	768	1943	1075	1406	-29238	5075	10985	5914	11451	15441		2.192	0	5276	6223	7153
2.196	2751	3393	366	6013	1184	613	1085	763	1922	1055	1386	-28867	4410	10269	5784	11733	15964		2.196	0	5311	6262	7167
2.2	2695	3254	348	5992	1161	602	1076	761	1901	1041	1367	-28513	3767	9638	5686	11828	16200		2.2	0	5333	6288	7169

## Sheet: Fig2C inset
hyp (uM)	area
2	1136484
4	2210323
8	4471222
16	8647782
24	13570735
32	18165404
48	28068071
64	43992015
96	57641010
128	66850331
192	76564549

## Sheet: Fig2D
HPLC	HPLC error	Bioassay	Bioassay error
2.4	0	4.1	1.2
9.8	0.1	8.5	0.2
12.5	0.2	10.5	0.6
4.6	0.1	3.8	0.5
11.5	0.2	10.9	0.6
19.7	0.3	17.3	1.6
