# Supplementary material for: Uncovering and resolving challenges of quantitative modeling in a simplified community of interacting cells
Source: PLoS Biol. 2019 Feb 22;17(2):e3000135. doi: 10.1371/journal.pbio.3000135 (PMC6402699; doi:10.1371/journal.pbio.3000135)
Supplement: S2 Table — CoSMO, Cooperation that is Synthetic and Mutually Obligatory. (XLSX) [file pbio.3000135.s028.xlsx]

## Sheet: Fig1ModelParameters
Model	Strain	with Mediator	Parameter	Value	Unit	Background	Source	Notes
i, ii	L-A+	Lys	bmaxL	0.51	per hr	RM11	Table 1 of this study	Max growth rate in excess Lys
i, ii	L-A+	Lys	KL	2.1	µM	RM11	Table 1 of this study	Lys conc at which half maximal growth rate is achieved.
i, ii	L-A+	Lys	nL	3.2		RM11	Table 1 of this study	Birth cooperativity
i, ii	L-A+	no Lys	dL	0.06	per hr	RM11	Table S7 of this study	Average death rate during starvation (measured from t=0 to 24~35hrs)
i, ii	L-A+	Lys	cL	3.8	fmole/birth	RM11	Table S5 of this study	Consumption per cell in saturated culture
i	L-A+	no Lys	rA	0.06	fmole/cell/hr	S288C	Shou et al, 2007	Release rate of Ade/Hyp recalculated for live release measured in starved culture (=0.02*3)
ii	L-A+	no Lys	rA	0.26	fmole/cell/hr	RM11	Table S7 of this study	Release rate of A in starved culture
i, ii	A-L+	Ade	bmaxA	0.46	per hr	RM11	This study, Fig S4	Max growth rate in excess Ade
i, ii	A-L+	Ade	KA	0.68	µM	RM11	This study, Fig S4	Ade conc at which half maximal growth rate is achieved
i, ii	A-L+	Ade	nA	1.12		RM11	This study, Fig S4	Birth cooperativity measured in Ade
	A-L+	Hypoxanthine	bmaxA	0.44	per hr	RM11	Table 1 of this study	Max growth rate in excess hyp
	A-L+	Hypoxanthine	KA	1.3	µM	RM11	Table 1 of this study	Hyp conc at which half maximal growth rate is achieved
	A-L+	Hypoxanthine	nA	1.5		RM11	Table 1 of this study	Birth cooperativity measured in Hyp
i, ii	A-L+	no Ade/Hyp	dA	0.005	per hr	RM11	Table S8 of this study	Average death rate during starvation (measured from 24 to 69~96hrs post wash)
i, ii	A-L+	Ade/Hyp	cA	0.957171	fmole/new cell	RM11	Table S6 of this study	Consumption of Ade or Hyp in saturated culture, which happen to be identical (Fig 2-Fig Supp1 A)
i	A-L+	no Ade/Hyp	rL	0.15	fmole/cell/hr	S288C	Shou et al, 2007	Release rate of lys recalculated for live release measured in starved culture (=0.01*15)
ii	A-L+	no Ade/Hyp	rL	0.52	fmole/cell/hr	RM11	Table S8 of this study	Release rate of lys in starved culture
