# Supplementary material for: Uncovering and resolving challenges of quantitative modeling in a simplified community of interacting cells
Source: PLoS Biol. 2019 Feb 22;17(2):e3000135. doi: 10.1371/journal.pbio.3000135 (PMC6402699; doi:10.1371/journal.pbio.3000135)
Supplement: S3 Data — (XLSX) [file pbio.3000135.s045.xlsx]

## Sheet: Fig3AB
Time	[dead]	[Live]	[dead]	[Live]	[hyp]	[hyp]
hrs	cell/mL	cell/mL	2*SD	2*SD	2*SD	uM
chemostat 5
0	2300	1500000	340	97000	0	0
9	86000	3600000	14000	460000	0.55325	6.6113
17	92000	3200000	14000	270000	0.343594	11.4671
20	85000	3000000	6100	76000	1.36876	12.0767
23.25	89000	3500000	16000	330000	3.0202	11.815
26.25	90000	3800000	20000	480000	3.19324	11.9598
32	110000	4000000	5600	230000	3.30385	12.7131
44	140000	3500000	3100	200000	2.16149	14.2249
chemostat 1
0	3600	4600000	1600	420000	0	0
9	120000	3800000	6300	120000	1.1	11.2
17	130000	3400000	27000	640000	1.5	15.7
20	110000	3500000	17000	640000	1.1	17.5
23.3	120000	4000000	9000	190000	1.3	15.8
26.3	120000	4100000	9600	360000	0.5	16.4
32	190000	4400000	8000	430000	1.9	17.1
44	240000	4300000	12000	290000	1.3	17.6

## Sheet: Fig3C
time	20160620_5, anc		20160620_1, anc		20160620_4, evo
hr	Lys uM, 1	Lys uM, 2	Lys uM, 1	Lys uM, 2	Lys uM, 1	Lys uM, 2
0			0	0	0	0
9	1	1.2	0.8	0.9	0	0
17	1.5	1.3	1.6	1.5	0	0
20	0.8	0.7	1.2	1.1	0.1	0.1
23.3	0.9	0.8	1.1	0.8	0	0
26.3	0.7	0.7	0.8	0.6	0	0
32	0.3	0.2	0.2	0.2	0.1	0
44	0.1	0.1	-0.1	0	0.1	0
