# Supplementary material for: Uncovering and resolving challenges of quantitative modeling in a simplified community of interacting cells
Source: PLoS Biol. 2019 Feb 22;17(2):e3000135. doi: 10.1371/journal.pbio.3000135 (PMC6402699; doi:10.1371/journal.pbio.3000135)
Supplement: S4 Data — (XLSX) [file pbio.3000135.s046.xlsx]

## Sheet: Fig4A
Time	cell density	2stdev density	lys	2stdev lys
hr	cells/ml	cells/ml	uM	uM
0	1600000	100000	90	10.8
1	2200000	300000	87.2	9.3
2	3400000	260000	79.8	1.5
3	5200000	880000	63.9	2.1
4	8200000	420000	46	0

## Sheet: Fig4B
[Lys]	total cell density	2SD tot cell density
0	26000	1300
1	58000	2000
2	470000	37000
2.5	660000	6200
5	1200000	19000
10	2200000	14000
20	4100000	770000
25	5400000	500000

## Sheet: Fig4C
Conditions	growth rate	mean	2SEM
	per hr	fmole lysine/birth
chemostat	0.087	5.1	0.7
	0.087	5.6	1
	0.087	5.5	1.2
	0.087	5.8	1.6
	0.231	5.9	0.5
	0.231	6.1	0.2
	0.126	4.9	0.4
	0.126	5.1	1.1
	0.126	4.7	0.5
	0.087	5.1	0.5
	0.116	5.6	0.6
	0.116	5.99903	0.8
exponential	0.418	7.2	0.9
	0.417	6.9	0.6
	0.393	8.3	1
	0.385	9	1.4
Stationary	0	3.4	0.4
	0	3.7	0.4
	0	3.7	0.3
	0	3.6	0.3
	0	2.8	0.2
	0	4	0.1
	0	4.7	0.1
	0	4.4	0.4
	0	4	0.4
