# Supplementary material for: Uncovering and resolving challenges of quantitative modeling in a simplified community of interacting cells
Source: PLoS Biol. 2019 Feb 22;17(2):e3000135. doi: 10.1371/journal.pbio.3000135 (PMC6402699; doi:10.1371/journal.pbio.3000135)
Supplement: S4 Table — CoSMO, Cooperation that is Synthetic and Mutually Obligatory. (XLSX) [file pbio.3000135.s030.xlsx]

## Sheet: Spot S24A
Each line represents one filter, which is the average of three FACS measurements.
Date	Experimenter	genotype	[L- A+]	[A- L+]	Supplement (to 2x SD, 2% agarose)	Rep name	time (hr)	Total	Dead	Live	[L- A+]	[A- L+]
2017-06-06	SH	anc-anc	1335	1340	0.7uM Lys	A	0	35140.4	184.073	34951.5	21895.8	12706.8
2017-06-06	SH	anc-anc	1335	1340	0.7uM Lys	A	26.75	77134.9	696.79	76438.1	39716.9	32323.2
2017-06-06	SH	anc-anc	1335	1340	0.7uM Lys	A	26.75	95523.1	511.246	94981.9	48662.1	39937.3
2017-06-06	SH	anc-anc	1335	1340	0.7uM Lys	A	44	89927.9	1279.73	88585.2	38426.3	38997.3
2017-06-06	SH	anc-anc	1335	1340	0.7uM Lys	A	44	79431.2	1048.98	78363.3	29932.7	37838.2
2017-06-06	SH	anc-anc	1335	1340	0.7uM Lys	A	44	80449.2	482.4	79947.9	33241.9	34882.2
2017-06-06	SH	anc-anc	1335	1340	0.7uM Lys	A	52.5	120065	1997.33	117764	36215.8	62450.9
2017-06-06	SH	anc-anc	1335	1340	0.7uM Lys	A	52.5	109519	1769.66	107587	33750.6	56592.9
2017-06-06	SH	anc-anc	1335	1340	0.7uM Lys	A	52.5	95229.9	919.961	94262.1	30528.9	47551
2017-06-06	SH	anc-anc	1335	1340	0.7uM Lys	A	68.5	259747	1765.32	257783	90590.6	132787
2017-06-06	SH	anc-anc	1335	1340	0.7uM Lys	A	68.5	187628	1264.42	186296	50335.2	108015
2017-06-06	SH	anc-anc	1335	1340	0.7uM Lys	A	68.5	281963	1250.77	280601	116918	134797
2017-06-06	SH	anc-anc	1335	1340	0.7uM Lys	A	75.75	767652	15771	751220	299506	434139
2017-06-06	SH	anc-anc	1335	1340	0.7uM Lys	A	75.75	424806	11086.2	413213	172684	223254
2017-06-06	SH	anc-anc	1335	1340	0.7uM Lys	A	75.75	396966	9371.53	386916	172475	200166
2017-06-06	SH	anc-anc	1335	1340	0.7uM Lys	A	93.5	3.03116e+06	61746.2	2.96791e+06	823677	2.10821e+06
2017-06-06	SH	anc-anc	1335	1340	0.7uM Lys	A	93.5	3.68082e+06	77122.3	3.60193e+06	1.08197e+06	2.48483e+06
2017-06-06	SH	anc-anc	1335	1340	0.7uM Lys	A	93.5	3.09217e+06	66667.4	3.02408e+06	882873	2.11048e+06
2017-05-23	SH	anc low	1335	1340	0.7uM Lys	A1	0	40766.6	323.776	40472	24325.1	15825.7
2017-05-23	SH	anc low	1335	1340	0.7uM Lys	A1	21	77302.1	258.757	77043.4	41201.1	32613.6
2017-05-23	SH	anc low	1335	1340	0.7uM Lys	A1	21	55164.2	324.54	54839.7	29579.8	23031.8
2017-05-23	SH	anc low	1335	1340	0.7uM Lys	A1	21	78247.3	399.426	77847.8	42869.8	31044.4
2017-05-23	SH	anc low	1335	1340	0.7uM Lys	A1	28.25	77389.5	1061.68	76354.1	35939.4	33905.5
2017-05-23	SH	anc low	1335	1340	0.7uM Lys	A1	28.25	88614.4	636.307	87978.1	43595.1	38252.8
2017-05-23	SH	anc low	1335	1340	0.7uM Lys	A1	28.25	76413.1	607.845	75805.3	34550.9	34984.5
2017-05-23	SH	anc low	1335	1340	0.7uM Lys	A1	45	121740	748.741	121113	39748	61508.9
2017-05-23	SH	anc low	1335	1340	0.7uM Lys	A1	45	168039	1922.46	166226	61410.4	84481.2
2017-05-23	SH	anc low	1335	1340	0.7uM Lys	A1	45	181621	2324.51	179387	59572.6	98325.8
2017-05-23	SH	anc low	1335	1340	0.7uM Lys	A1	51.5	424672	11502.9	413465	231837	158638
2017-05-23	SH	anc low	1335	1340	0.7uM Lys	A1	51.5	493107	10472.7	482986	283262	169454
2017-05-23	SH	anc low	1335	1340	0.7uM Lys	A1	51.5	524708	7596.88	517315	323894	165959
2017-05-23	SH	anc low	1335	1340	0.7uM Lys	A1	68.25	4.22116e+06	64455.5	4.16547e+06	1.21417e+06	2.90699e+06
2017-05-23	SH	anc low	1335	1340	0.7uM Lys	A1	68.25	3.56575e+06	53572.9	3.5125e+06	1.07003e+06	2.40555e+06
2017-05-23	SH	anc low	1335	1340	0.7uM Lys	A1	68.25	3.63112e+06	60990.4	3.56982e+06	1.06569e+06	2.46328e+06
2017-05-23	SH	anc low	1335	1340	0.7uM Lys	A1	75.75	8.94729e+06	120367	8.82374e+06	2.50313e+06	6.27596e+06
2017-05-23	SH	anc low	1335	1340	0.7uM Lys	A1	75.75	7.57286e+06	100011	7.47599e+06	2.09996e+06	5.33267e+06
2017-05-23	SH	anc low	1335	1340	0.7uM Lys	A1	75.75	9.29553e+06	118331	9.17935e+06	2.67265e+06	6.44882e+06
2017-05-23	SH	anc low	1335	1340	0.7uM Lys	A1	96.25	6.1553e+07	852081	6.05968e+07	3.18521e+07	2.83787e+07
2017-05-23	SH	anc low	1335	1340	0.7uM Lys	A1	96.25	5.26195e+07	666625	5.19502e+07	2.71888e+07	2.4378e+07
2017-05-23	SH	anc low	1335	1340	0.7uM Lys	A1	96.25	5.40133e+07	735976	5.32753e+07	2.73528e+07	2.55596e+07
2017-05-23	SH	anc high	1335	1340	0.7uM Lys	A2	0	144637	963.885	143674	86783.3	56497.3
2017-05-23	SH	anc high	1335	1340	0.7uM Lys	A2	21	348699	4216.11	344512	160943	166875
2017-05-23	SH	anc high	1335	1340	0.7uM Lys	A2	21	317849	2783.5	315094	142486	158521
2017-05-23	SH	anc high	1335	1340	0.7uM Lys	A2	21	338598	2298.92	336328	153860	166118
2017-05-23	SH	anc high	1335	1340	0.7uM Lys	A2	28.25	463823	8493.84	455724	183361	236788
2017-05-23	SH	anc high	1335	1340	0.7uM Lys	A2	28.25	502362	6761.44	495810	203469	253516
2017-05-23	SH	anc high	1335	1340	0.7uM Lys	A2	28.25	506300	6495.51	500112	199368	259461
2017-05-23	SH	anc high	1335	1340	0.7uM Lys	A2	45	6.92737e+06	103913	6.82721e+06	4.26393e+06	2.44204e+06
2017-05-23	SH	anc high	1335	1340	0.7uM Lys	A2	45	7.99819e+06	112695	7.8876e+06	4.89875e+06	2.85739e+06
2017-05-23	SH	anc high	1335	1340	0.7uM Lys	A2	45	8.25023e+06	101055	8.15274e+06	5.12259e+06	2.89161e+06
2017-05-23	SH	anc high	1335	1340	0.7uM Lys	A2	51.5	1.49384e+07	227813	1.4709e+07	6.09327e+06	8.5008e+06
2017-05-23	SH	anc high	1335	1340	0.7uM Lys	A2	51.5	1.5668e+07	224288	1.54469e+07	6.01401e+06	9.30548e+06
2017-05-23	SH	anc high	1335	1340	0.7uM Lys	A2	51.5	1.5013e+07	205374	1.48037e+07	5.88243e+06	8.81647e+06
2017-05-23	SH	anc high	1335	1340	0.7uM Lys	A2	68.25	7.71042e+07	924896	7.62344e+07	2.83169e+07	4.7338e+07
2017-05-23	SH	anc high	1335	1340	0.7uM Lys	A2	68.25	7.6636e+07	951691	7.58109e+07	2.79013e+07	4.73956e+07
2017-05-23	SH	anc high	1335	1340	0.7uM Lys	A2	68.25	8.55611e+07	926513	8.46493e+07	3.10723e+07	5.30983e+07
2017-05-23	SH	anc high	1335	1340	0.7uM Lys	A2	73	1.14268e+08	2.56195e+06	1.11681e+08	3.87781e+07	7.09231e+07
2017-05-23	SH	anc high	1335	1340	0.7uM Lys	A2	73	1.02212e+08	2.2426e+06	9.9851e+07	3.54332e+07	6.30788e+07
2017-05-23	SH	anc high	1335	1340	0.7uM Lys	A2	73	1.10954e+08	2.17192e+06	1.09018e+08	3.82532e+07	6.96711e+07
2017-03-28	SH	anc	1335/1657	1340/1342	0.7uM Lys	A1	0	41113.9	194.196	41034.2	24143.7	16890.4
2017-03-28	SH	anc	1335/1657	1340/1342	0.7uM Lys	A1	25	80206.3	4710.53	75584.1	36955.7	38628.5
2017-03-28	SH	anc	1335/1657	1340/1342	0.7uM Lys	A1	25	76561.8	7687.93	68896.5	39892.3	29004.2
2017-03-28	SH	anc	1335/1657	1340/1342	0.7uM Lys	A1	25	67656.5	5427.5	62375	36419.3	25955.7
2017-03-28	SH	anc	1335/1657	1340/1342	0.7uM Lys	A1	33.5	76196.5	9310.87	67010.7	34564.3	32446.4
2017-03-28	SH	anc	1335/1657	1340/1342	0.7uM Lys	A1	33.5	79513	9647.68	70107.8	36140.4	33967.4
2017-03-28	SH	anc	1335/1657	1340/1342	0.7uM Lys	A1	33.5	70275.2	10521.7	59655.7	30677	28978.6
2017-03-28	SH	anc	1335/1657	1340/1342	0.7uM Lys	A1	43.5	82675.7	9441.4	74219.3	37598.6	36620.7
2017-03-28	SH	anc	1335/1657	1340/1342	0.7uM Lys	A1	43.5	87638.6	10819.2	76953.2	37543.6	39409.6
2017-03-28	SH	anc	1335/1657	1340/1342	0.7uM Lys	A1	43.5	92353.9	13834.8	78818.1	36266.4	42551.7
2017-03-28	SH	anc	1335/1657	1340/1342	0.7uM Lys	A1	51.5	101322	16535.4	84981.9	35261.4	49720.6
2017-03-28	SH	anc	1335/1657	1340/1342	0.7uM Lys	A1	51.5	96153.2	16281.7	80084.9	35099.4	44985.5
2017-03-28	SH	anc	1335/1657	1340/1342	0.7uM Lys	A1	51.5	96354	17432	78973.4	34039.4	44934
2017-03-28	SH	anc	1335/1657	1340/1342	0.7uM Lys	A1	67	709495	32291.8	675789	459664	216125
2017-03-28	SH	anc	1335/1657	1340/1342	0.7uM Lys	A1	67	696816	34000.9	662519	455440	207079
2017-03-28	SH	anc	1335/1657	1340/1342	0.7uM Lys	A1	67	476796	31541.6	445629	301555	144074
2017-03-28	SH	anc	1335/1657	1340/1342	0.7uM Lys	A1	75	982848	37384.1	947114	592363	354750
2017-03-28	SH	anc	1335/1657	1340/1342	0.7uM Lys	A1	75	1.38508e+06	32956.9	1.35998e+06	749384	610599
2017-03-28	SH	anc	1335/1657	1340/1342	0.7uM Lys	A1	75	1.21122e+06	42100.5	1.17158e+06	672129	499452
2017-03-28	SH	anc	1335/1657	1340/1342	0.7uM Lys	A1	94.5	7.4607e+06	96310.2	7.35068e+06	1.95369e+06	5.39699e+06
2017-03-28	SH	anc	1335/1657	1340/1342	0.7uM Lys	A1	94.5	8.50884e+06	99833.2	8.40109e+06	2.40187e+06	5.99922e+06
2017-03-28	SH	anc	1335/1657	1340/1342	0.7uM Lys	A1	94.5	8.50884e+06	99833.2	8.40109e+06	2.40187e+06	5.99922e+06
2016-12-13	SH	anc	1335/1657	1340/1342	AGAR	anc-A	0	35371.5	257.264	35189.9	18211.1	16978.8
2016-12-13	SH	anc	1335/1657	1340/1342	AGAR	anc-A	21	91520.9	7165.62	84326.3	38278.3	46048
2016-12-13	SH	anc	1335/1657	1340/1342	AGAR	anc-A	21	82168	8085.01	74101.7	31669.8	42431.9
2016-12-13	SH	anc	1335/1657	1340/1342	AGAR	anc-A	28	99997.6	10270.7	89814.5	24968.9	64845.6
2016-12-13	SH	anc	1335/1657	1340/1342	AGAR	anc-A	28	96876.1	11933.6	85008.4	27247.8	57760.7
2016-12-13	SH	anc	1335/1657	1340/1342	AGAR	anc-A	46	187596	35910.9	151578	55092.6	96484.9
2016-12-13	SH	anc	1335/1657	1340/1342	AGAR	anc-A	46	155471	33658.2	121862	41286.6	80575.3
2016-12-13	SH	anc	1335/1657	1340/1342	AGAR	anc-A	69.5	6.34611e+06	90680.1	6.27436e+06	1.95171e+06	4.32265e+06
2016-12-13	SH	anc	1335/1657	1340/1342	AGAR	anc-A	69.5	7.12615e+06	98235	7.05775e+06	2.22969e+06	4.82806e+06
2016-12-13	SH	anc	1335/1657	1340/1342	AGAR	anc-A	91	4.81046e+07	745214	4.71505e+07	2.33977e+07	2.37528e+07
2016-12-13	SH	anc	1335/1657	1340/1342	AGAR	anc-A	91	4.80622e+07	602154	4.72552e+07	2.3616e+07	2.36392e+07
2016-12-13	SH	anc	1335/1657	1340/1342	AGAR	anc-A	99	7.42541e+07	1.27542e+06	7.28199e+07	3.82909e+07	3.4529e+07
2016-12-13	SH	anc	1335/1657	1340/1342	AGAR	anc-A	99	7.1274e+07	1.1719e+06	6.99466e+07	3.59946e+07	3.3952e+07
2016-12-13	SH	anc	1335/1657	1340/1342	0.3uM lys	anc-B	0	35371.5	257.264	35189.9	18211.1	16978.8
2016-12-13	SH	anc	1335/1657	1340/1342	0.3uM lys	anc-B	21	55029.3	1777.9	53348.8	27689.7	25659.1
2016-12-13	SH	anc	1335/1657	1340/1342	0.3uM lys	anc-B	21	59595	4754.24	54940.7	29827.3	25113.5
2016-12-13	SH	anc	1335/1657	1340/1342	0.3uM lys	anc-B	28	60956.5	9021.3	51959.4	28265	23694.3
2016-12-13	SH	anc	1335/1657	1340/1342	0.3uM lys	anc-B	28	39493.7	3513.71	36028.3	16381.1	19647.2
2016-12-13	SH	anc	1335/1657	1340/1342	0.3uM lys	anc-B	46	85811.8	19042.2	66862.7	22349.5	44513.2
2016-12-13	SH	anc	1335/1657	1340/1342	0.3uM lys	anc-B	46	78241.9	17360.9	60925.2	20716.8	40208.4
2016-12-13	SH	anc	1335/1657	1340/1342	0.3uM lys	anc-B	69.5	1.07915e+06	23366.4	1.0556e+06	499179	556416
2016-12-13	SH	anc	1335/1657	1340/1342	0.3uM lys	anc-B	69.5	459651	29724.2	429690	287395	142294
2016-12-13	SH	anc	1335/1657	1340/1342	0.3uM lys	anc-B	91	7.89967e+06	66669.1	7.81577e+06	2.43632e+06	5.37945e+06
2016-12-13	SH	anc	1335/1657	1340/1342	0.3uM lys	anc-B	91	8.85763e+06	67295.2	8.76026e+06	2.799e+06	5.96125e+06
2016-12-13	SH	anc	1335/1657	1340/1342	0.3uM lys	anc-B	99	5.73595e+06	91953	5.64966e+06	2.32512e+06	3.32453e+06
2016-12-13	SH	anc	1335/1657	1340/1342	0.3uM lys	anc-B	99	2.20758e+07	326928	2.17205e+07	1.07532e+07	1.09674e+07
2016-12-13	SH	anc	1335/1657	1340/1342	0.7uM lys	anc-C	0	35371.5	257.264	35189.9	18211.1	16978.8	Fig 7A
2016-12-13	SH	anc	1335/1657	1340/1342	0.7uM lys	anc-C	21	60888	4369.12	56677.5	33404.8	23272.7
2016-12-13	SH	anc	1335/1657	1340/1342	0.7uM lys	anc-C	21	74455.2	3802.72	70748.6	43735.7	27012.9
2016-12-13	SH	anc	1335/1657	1340/1342	0.7uM lys	anc-C	28	58980.5	4501.06	54497.9	28239.2	26258.7
2016-12-13	SH	anc	1335/1657	1340/1342	0.7uM lys	anc-C	28	79981.1	6332.14	73740.8	40633.7	33107.1
2016-12-13	SH	anc	1335/1657	1340/1342	0.7uM lys	anc-C	46	112349	15835.9	96592.1	36425.9	60166.2
2016-12-13	SH	anc	1335/1657	1340/1342	0.7uM lys	anc-C	46	106699	16927.1	89899.3	31916.3	57982.9
2016-12-13	SH	anc	1335/1657	1340/1342	0.7uM lys	anc-C	69.5	2.01586e+06	36755.2	1.98096e+06	726741	1.25422e+06
2016-12-13	SH	anc	1335/1657	1340/1342	0.7uM lys	anc-C	69.5	1.60386e+06	41983.5	1.56282e+06	592390	970433
2016-12-13	SH	anc	1335/1657	1340/1342	0.7uM lys	anc-C	91	9.23165e+06	75974.6	9.09802e+06	2.80899e+06	6.28903e+06
2016-12-13	SH	anc	1335/1657	1340/1342	0.7uM lys	anc-C	91	1.11799e+07	105047	1.10609e+07	3.8006e+06	7.26034e+06
2016-12-13	SH	anc	1335/1657	1340/1342	0.7uM lys	anc-C	99	2.13164e+07	243211	2.10802e+07	9.589e+06	1.14912e+07
2016-12-13	SH	anc	1335/1657	1340/1342	0.7uM lys	anc-C	99	3.8139e+07	427947	3.76721e+07	1.79286e+07	1.97435e+07
2016-12-13	SH	anc	1335/1657	1340/1342	1.5uM lys	anc-D	0	35371.5	257.264	35189.9	18211.1	16978.8
2016-12-13	SH	anc	1335/1657	1340/1342	1.5uM lys	anc-D	21	102790	4136.55	98896.2	60137.7	38758.5
2016-12-13	SH	anc	1335/1657	1340/1342	1.5uM lys	anc-D	21	92022.5	2723.5	89475	54750.9	34724.2
2016-12-13	SH	anc	1335/1657	1340/1342	1.5uM lys	anc-D	28	104042	6234.6	97873.6	49674.8	48198.9
2016-12-13	SH	anc	1335/1657	1340/1342	1.5uM lys	anc-D	28	83207.5	3764.74	79558.1	37780.8	41777.3
2016-12-13	SH	anc	1335/1657	1340/1342	1.5uM lys	anc-D	46	183448	22559.8	161155	46571	114584
2016-12-13	SH	anc	1335/1657	1340/1342	1.5uM lys	anc-D	46	175828	24666	151289	66262.1	85027.1
2016-12-13	SH	anc	1335/1657	1340/1342	1.5uM lys	anc-D	69.5	3.54845e+06	41067	3.5122e+06	1.54871e+06	1.96349e+06
2016-12-13	SH	anc	1335/1657	1340/1342	1.5uM lys	anc-D	69.5	3.94126e+06	81772.3	3.86664e+06	1.62211e+06	2.24453e+06
2016-12-13	SH	anc	1335/1657	1340/1342	1.5uM lys	anc-D	91	2.6621e+07	232001	2.63342e+07	1.05323e+07	1.58019e+07
2016-12-13	SH	anc	1335/1657	1340/1342	1.5uM lys	anc-D	91	3.33929e+07	288223	3.29409e+07	1.44632e+07	1.84777e+07
2016-12-13	SH	anc	1335/1657	1340/1342	1.5uM lys	anc-D	99	6.92914e+07	782421	6.83351e+07	3.31755e+07	3.51596e+07
2016-12-13	SH	anc	1335/1657	1340/1342	1.5uM lys	anc-D	99	6.87798e+07	815943	6.78717e+07	3.2109e+07	3.57627e+07

## Sheet: Column S24B
Each line represents one filter, which is the average of three FACS measurements.
Date	Experimenter	genotype	[L- A+]	[A- L+]	Supplement (to 2x SD, 2% agarose)	Setup deviations	Rep name	time (hr)	Total	Dead	Live	[A- L+]	[L- A+] (red)	[L- A+] (blue)	[L-A+]tot
2016-03-09	HM	anc	1335/1657	1340		96-well deep plates atop filter	A	0	150816	0	150816	75408	37704	37704	75408
2016-03-09	HM	anc	1335/1657	1340		96-well deep plates atop filter	A	0	150816	0	150816	75408	37704	37704	75408
2016-03-09	HM	anc	1335/1657	1340		96-well deep plates atop filter	A	0	150816	0	150816	75408	37704	37704	75408
2016-03-09	HM	anc	1335/1657	1340		96-well deep plates atop filter	A	26.4	399600	42928.8	356819	208959	63521.1	62108	125629
2016-03-09	HM	anc	1335/1657	1340		96-well deep plates atop filter	A	26.4	372968	44129.7	329022	187754	57601.1	58887	116488
2016-03-09	HM	anc	1335/1657	1340		96-well deep plates atop filter	A	26.4	356591	35568.9	321164	174020	60151.2	58945.8	119097
2016-03-09	HM	anc	1335/1657	1340		96-well deep plates atop filter	A	33	627025	84124.7	542473	341414	93016.8	85138.1	178155
2016-03-09	HM	anc	1335/1657	1340		96-well deep plates atop filter	A	33	595360	79258.1	515588	298032	99699.4	94253.3	193953
2016-03-09	HM	anc	1335/1657	1340		96-well deep plates atop filter	A	33	533017	85406.5	446952	265995	76874.1	75212.4	152087
2016-03-09	HM	anc	1335/1657	1340		96-well deep plates atop filter	A	42.8	2.96302e+06	162942	2.80051e+06	550501	1.15225e+06	1.05898e+06	2.21122e+06
2016-03-09	HM	anc	1335/1657	1340		96-well deep plates atop filter	A	42.8	2.6698e+06	120415	2.54971e+06	505148	1.0688e+06	935173	2.00397e+06
2016-03-09	HM	anc	1335/1657	1340		96-well deep plates atop filter	A	42.8	3.92059e+06	153251	3.76768e+06	857427	1.48182e+06	1.37543e+06	2.85725e+06
2016-03-09	HM	anc	1335/1657	1340		96-well deep plates atop filter	A	50.1	7.161e+06	291789	6.86998e+06	2.43768e+06	2.2483e+06	2.11491e+06	4.36321e+06
2016-03-09	HM	anc	1335/1657	1340		96-well deep plates atop filter	A	50.1	5.4191e+06	206815	5.21283e+06	1.73781e+06	1.78742e+06	1.63762e+06	3.42504e+06
2016-03-09	HM	anc	1335/1657	1340		96-well deep plates atop filter	A	50.1	4.97793e+06	185212	4.7928e+06	1.17333e+06	1.87061e+06	1.7004e+06	3.57101e+06
2016-03-09	HM	anc	1335/1657	1340		96-well deep plates atop filter	A	56.5	1.52169e+07	270620	1.49467e+07	7.7383e+06	3.61745e+06	3.46874e+06	7.08619e+06
2016-03-09	HM	anc	1335/1657	1340		96-well deep plates atop filter	A	56.5	1.47801e+07	315073	1.44655e+07	7.51788e+06	3.42929e+06	3.37972e+06	6.80901e+06
2016-03-09	HM	anc	1335/1657	1340		96-well deep plates atop filter	A	56.5	2.36957e+07	344255	2.33519e+07	1.23766e+07	5.50722e+06	5.22542e+06	1.07326e+07
2016-03-09	HM	anc	1335/1657	1340		96-well deep plates atop filter	A	66.1	4.47069e+07	743206	4.39645e+07	2.92168e+07	7.35093e+06	7.08441e+06	1.44353e+07
2016-03-09	HM	anc	1335/1657	1340		96-well deep plates atop filter	A	66.1	3.95208e+07	520561	3.90002e+07	2.49828e+07	7.01848e+06	6.62414e+06	1.36426e+07
2016-03-09	HM	anc	1335/1657	1340		96-well deep plates atop filter	A	66.1	4.50402e+07	587388	4.44532e+07	2.82321e+07	8.23282e+06	7.56422e+06	1.5797e+07
2016-03-09	HM	anc	1335/1657	1340		96-well deep plates atop filter	A	74.2	6.65543e+07	906205	6.56435e+07	4.61422e+07	9.64086e+06	9.37517e+06	1.9016e+07
2016-03-09	HM	anc	1335/1657	1340		96-well deep plates atop filter	A	74.2	6.35964e+07	880336	6.27152e+07	4.36799e+07	9.70461e+06	8.91107e+06	1.86157e+07
2016-03-09	HM	anc	1335/1657	1340		96-well deep plates atop filter	A	74.2	6.57269e+07	874621	6.48527e+07	4.48268e+07	1.01918e+07	9.3684e+06	1.95602e+07
2016-03-09	HM	anc	1335/1657	1340		96-well deep plates atop filter	A	80.6	8.30869e+07	1.23904e+06	8.18487e+07	5.63338e+07	1.30388e+07	1.18694e+07	2.49082e+07
2016-03-09	HM	anc	1335/1657	1340		96-well deep plates atop filter	A	80.6	8.55518e+07	1.34208e+06	8.42112e+07	6.21799e+07	1.09303e+07	1.04984e+07	2.14286e+07
2016-03-09	HM	anc	1335/1657	1340		96-well deep plates atop filter	A	80.6	8.03873e+07	1.29468e+06	7.90935e+07	5.44368e+07	1.21931e+07	1.17564e+07	2.39495e+07
2016-03-13	HM	anc	1335/1657	1340		96-well deep plates atop filter	A	0	150816	0	150816	75408	37704	37704	75408
2016-03-13	HM	anc	1335/1657	1340		96-well deep plates atop filter	A	0	150816	0	150816	75408	37704	37704	75408
2016-03-13	HM	anc	1335/1657	1340		96-well deep plates atop filter	A	0	150816	0	150816	75408	37704	37704	75408
2016-03-13	HM	anc	1335/1657	1340		96-well deep plates atop filter	A	26.5	380126	34183.6	345953	175545	57789.3	90853.1	148642
2016-03-13	HM	anc	1335/1657	1340		96-well deep plates atop filter	A	26.5	372405	26827.2	345586	181413	60114.7	79357.8	139472
2016-03-13	HM	anc	1335/1657	1340		96-well deep plates atop filter	A	26.5	332567	20996.2	311592	164655	57477.7	66036.5	123514
2016-03-13	HM	anc	1335/1657	1340		96-well deep plates atop filter	A	31.2	455943	87686.1	368215	201102	67950	78856.7	146807
2016-03-13	HM	anc	1335/1657	1340		96-well deep plates atop filter	A	31.2	510060	70515.7	439688	273825	74343.9	73466.6	147810
2016-03-13	HM	anc	1335/1657	1340		96-well deep plates atop filter	A	31.2	487762	62135.9	425643	241738	62867.2	94067.5	156935
2016-03-13	HM	anc	1335/1657	1340		96-well deep plates atop filter	A	40.8	1.89983e+06	107678	1.7923e+06	347344	676774	725457	1.40223e+06
2016-03-13	HM	anc	1335/1657	1340		96-well deep plates atop filter	A	40.8	1.4462e+06	91928.6	1.35447e+06	296098	497732	516492	1.01422e+06
2016-03-13	HM	anc	1335/1657	1340		96-well deep plates atop filter	A	40.8	1.4771e+06	98192.9	1.37903e+06	309698	495404	524971	1.02037e+06
2016-03-13	HM	anc	1335/1657	1340		96-well deep plates atop filter	A	48.1	5.12664e+06	233443	4.89349e+06	953630	1.8644e+06	2.02428e+06	3.88868e+06
2016-03-13	HM	anc	1335/1657	1340		96-well deep plates atop filter	A	48.1	4.77064e+06	198896	4.57187e+06	950634	1.72499e+06	1.84885e+06	3.57385e+06
2016-03-13	HM	anc	1335/1657	1340		96-well deep plates atop filter	A	48.1	5.03132e+06	204637	4.82684e+06	1.30951e+06	1.74229e+06	1.72175e+06	3.46404e+06
2016-03-13	HM	anc	1335/1657	1340		96-well deep plates atop filter	A	54.7	1.2072e+07	276877	1.17955e+07	5.36472e+06	3.00616e+06	3.33986e+06	6.34602e+06
2016-03-13	HM	anc	1335/1657	1340		96-well deep plates atop filter	A	54.7	1.27101e+07	273976	1.24364e+07	5.69725e+06	3.1287e+06	3.52796e+06	6.65666e+06
2016-03-13	HM	anc	1335/1657	1340		96-well deep plates atop filter	A	54.7	1.81235e+07	331048	1.77926e+07	8.43842e+06	4.29997e+06	4.91758e+06	9.21754e+06
2016-03-13	HM	anc	1335/1657	1340		96-well deep plates atop filter	A	66.5	3.91083e+07	644075	3.84633e+07	2.44086e+07	6.71383e+06	7.12331e+06	1.38371e+07
2016-03-13	HM	anc	1335/1657	1340		96-well deep plates atop filter	A	66.5	4.49254e+07	683366	4.42403e+07	2.866e+07	7.52088e+06	7.73583e+06	1.52567e+07
2016-03-13	HM	anc	1335/1657	1340		96-well deep plates atop filter	A	66.5	5.25453e+07	708979	5.1835e+07	3.5161e+07	7.75671e+06	8.57297e+06	1.63297e+07
2016-03-13	HM	anc	1335/1657	1340		96-well deep plates atop filter	A	73.7	7.47722e+07	1.16277e+06	7.36095e+07	5.37077e+07	8.96138e+06	1.03512e+07	1.93126e+07
2016-03-13	HM	anc	1335/1657	1340		96-well deep plates atop filter	A	73.7	6.58287e+07	981191	6.48475e+07	4.75664e+07	8.15091e+06	8.60903e+06	1.67599e+07
2016-03-13	HM	anc	1335/1657	1340		96-well deep plates atop filter	A	73.7	7.26183e+07	962285	7.16565e+07	5.31001e+07	8.49726e+06	9.51446e+06	1.80117e+07
2016-03-13	HM	anc	1335/1657	1340		96-well deep plates atop filter	A	78.8	8.76712e+07	1.67641e+06	8.59966e+07	6.46735e+07	9.90988e+06	1.08561e+07	2.0766e+07
2016-03-13	HM	anc	1335/1657	1340		96-well deep plates atop filter	A	78.8	8.65438e+07	1.48441e+06	8.50612e+07	6.47842e+07	8.8318e+06	1.08627e+07	1.96945e+07
2016-03-13	HM	anc	1335/1657	1340		96-well deep plates atop filter	A	78.8	8.54431e+07	1.3558e+06	8.40882e+07	6.12135e+07	1.05468e+07	1.16735e+07	2.22203e+07
2016-03-16	HM	anc	1335/1657	1340		96-well deep plates atop filter	A	0	150816	0	150816	75408	37704	37704	75408
2016-03-16	HM	anc	1335/1657	1340		96-well deep plates atop filter	A	0	150816	0	150816	75408	37704	37704	75408
2016-03-16	HM	anc	1335/1657	1340		96-well deep plates atop filter	A	0	150816	0	150816	75408	37704	37704	75408
2016-03-16	HM	anc	1335/1657	1340		96-well deep plates atop filter	A	26.4	381195	23106.4	358177	185776	54917.5	62693.1	117611
2016-03-16	HM	anc	1335/1657	1340		96-well deep plates atop filter	A	26.4	353714	17701.3	336074	175314	59443.3	63952.3	123396
2016-03-16	HM	anc	1335/1657	1340		96-well deep plates atop filter	A	26.4	307661	9729.69	297955	149025	48626	59986.3	108612
2016-03-16	HM	anc	1335/1657	1340		96-well deep plates atop filter	A	32.7	418063	73871.5	344181	201270	56663.8	55452.1	112116
2016-03-16	HM	anc	1335/1657	1340		96-well deep plates atop filter	A	32.7	444233	84469.9	359662	186809	57189.5	93210.7	150400
2016-03-16	HM	anc	1335/1657	1340		96-well deep plates atop filter	A	32.7	666627	48628.5	618187	296254	135279	148220	283498
2016-03-16	HM	anc	1335/1657	1340		96-well deep plates atop filter	A	44	2.9854e+06	179590	2.80586e+06	524550	1.04285e+06	1.19033e+06	2.23318e+06
2016-03-16	HM	anc	1335/1657	1340		96-well deep plates atop filter	A	44	2.34649e+06	155783	2.19079e+06	391520	874263	895735	1.77e+06
2016-03-16	HM	anc	1335/1657	1340		96-well deep plates atop filter	A	44	2.14134e+06	179329	1.96227e+06	396721	810031	725317	1.53535e+06
2016-03-16	HM	anc	1335/1657	1340		96-well deep plates atop filter	A	49.1	4.07243e+06	159722	3.91288e+06	1.07707e+06	1.31491e+06	1.48455e+06	2.79946e+06
2016-03-16	HM	anc	1335/1657	1340		96-well deep plates atop filter	A	49.1	5.02967e+06	186932	4.84291e+06	1.4045e+06	1.60831e+06	1.78709e+06	3.3954e+06
2016-03-16	HM	anc	1335/1657	1340		96-well deep plates atop filter	A	49.1	3.67057e+06	160556	3.51035e+06	817622	1.26845e+06	1.38073e+06	2.64918e+06
2016-03-16	HM	anc	1335/1657	1340		96-well deep plates atop filter	A	56.2	1.401e+07	279432	1.37309e+07	6.82625e+06	3.02966e+06	3.75465e+06	6.78431e+06
2016-03-16	HM	anc	1335/1657	1340		96-well deep plates atop filter	A	56.2	1.26439e+07	284974	1.23593e+07	5.39341e+06	3.28322e+06	3.57423e+06	6.85746e+06
2016-03-16	HM	anc	1335/1657	1340		96-well deep plates atop filter	A	56.2	1.38941e+07	322856	1.35717e+07	4.90651e+06	4.17926e+06	4.35162e+06	8.53088e+06
2016-03-16	HM	anc	1335/1657	1340		96-well deep plates atop filter	A	67.8	5.53974e+07	647690	5.47493e+07	3.81556e+07	7.48141e+06	8.68866e+06	1.61701e+07
2016-03-16	HM	anc	1335/1657	1340		96-well deep plates atop filter	A	67.8	3.32828e+07	433471	3.28485e+07	1.92339e+07	6.367e+06	6.72636e+06	1.30934e+07
2016-03-16	HM	anc	1335/1657	1340		96-well deep plates atop filter	A	67.8	3.13152e+07	382353	3.09324e+07	1.89973e+07	5.5646e+06	5.82935e+06	1.1394e+07
2016-03-16	HM	anc	1335/1657	1340		96-well deep plates atop filter	A	75.3	6.06514e+07	810206	5.98425e+07	4.10372e+07	8.44923e+06	9.84004e+06	1.82893e+07
2016-03-16	HM	anc	1335/1657	1340		96-well deep plates atop filter	A	75.3	6.67855e+07	947648	6.58382e+07	4.70452e+07	8.41802e+06	9.83109e+06	1.82491e+07
2016-03-16	HM	anc	1335/1657	1340		96-well deep plates atop filter	A	75.3	6.69774e+07	864760	6.61136e+07	4.74134e+07	8.30511e+06	9.75209e+06	1.80572e+07
2016-03-16	HM	anc	1335/1657	1340		96-well deep plates atop filter	A	80.3	8.66207e+07	1.29132e+06	8.53316e+07	5.99323e+07	1.15754e+07	1.30811e+07	2.46566e+07
2016-03-16	HM	anc	1335/1657	1340		96-well deep plates atop filter	A	80.3	7.64568e+07	1.19143e+06	7.52654e+07	5.32431e+07	9.53617e+06	1.18289e+07	2.13651e+07
2016-03-16	HM	anc	1335/1657	1340		96-well deep plates atop filter	A	80.3	7.70725e+07	1.30235e+06	7.57727e+07	5.38041e+07	1.003e+07	1.12075e+07	2.12375e+07

## Sheet: Summary S24C
Date	Experimenter	Config	[L- A+]	[A- L+]	Medium	T start	T end	Growth R(/hr)	2SEM (/hr)	Max tot cell #
2016-03-09	HM	Column	1335:1657	1340	agar	33	81	0.106705	0.0219711	83000000
2016-03-13	HM	Column	1335:1657	1340	agar	31	79	0.115413	0.018132	87000000
2016-03-16	HM	Column	1335:1657	1340	agar	33	80	0.110514	0.016796	80000000
2016-12-13	SH	Spot	1335	1340/1342	agarose; 0.3uM lys	46	99	0.103625	0.00802941	1.36851e+07
2016-12-13	SH	Spot	1335	1340/1342	agarose; 0.7uM lys	46	99	0.105208	0.0140575	2.93762e+07
2016-12-13	SH	Spot	1335	1340/1342	agarose; 1.5uM lys	46	99	0.113512	0.0131656	6.81034e+07
2016-12-13	SH	Spot	1335	1340/1342	agar	46	99	0.12	0.0315474	7.13832e+07
2017-03-28	SH	Spot	1335/1657	1340/1342	agarose; 0.7uM Lys	51.5	94.5	0.105601	0.0123511	8.05095e+06
2017-05-23	SH	Spot	1335	1340	agarose; 0.7uM Lys	45	96.25	0.112396	0.0127552	5.60619e+07
2017-05-23	SH	Spot	1335	1340	agarose; 0.7uM Lys	28.25	73	0.118283	0.0125111	1.09145e+08
2017-06-06	SH	Spot	1335	1340	agarose; 0.7uM Lys	68.5	93.5	0.103199	0.00105002	3.26805e+06
