# Supplementary material for: Uncovering and resolving challenges of quantitative modeling in a simplified community of interacting cells
Source: PLoS Biol. 2019 Feb 22;17(2):e3000135. doi: 10.1371/journal.pbio.3000135 (PMC6402699; doi:10.1371/journal.pbio.3000135)
Supplement: S5 Data — (XLSX) [file pbio.3000135.s047.xlsx]

## Sheet: Fig5AB
Time	Dead	Dead 2SD	Live	Live 2SD	Hyp #1	Hyp #2	mean Hyp	Accu Live Density	Increased dead density
hr	cells/ml	cells/ml	cells/ml	cells/ml	uM	uM	uM	hr*cells/ml	cells/ml
0	1900	700	4600000	370000	0	0	0	0	0
6	420000	28000	5800000	180000	5.7	6.1	5.9	31200000	418100
12	1500000	44000	3900000	300000	12.8	12.8	12.8	60300000	1498100
19	3000000	170000	2400000	100000	18.4	17.2	17.8	82350000	2998100
24	4200000	290000	1500000	110000	20	19.2	19.6	92100000	4198100
