# Supplementary material for: Uncovering and resolving challenges of quantitative modeling in a simplified community of interacting cells
Source: PLoS Biol. 2019 Feb 22;17(2):e3000135. doi: 10.1371/journal.pbio.3000135 (PMC6402699; doi:10.1371/journal.pbio.3000135)
Supplement: S5 Table — (XLSX) [file pbio.3000135.s031.xlsx]

## Sheet: 1335_consump
Strain	Experimenter	Date	replicate	birth (/hr)	fmole/new cell	2*sd/se	Culture condition	begin (hr)	end (hr)	Analysis Method	Source	Notes		Ave fmole/cell
1335	SH	20151120		0	4.01611	0.134798	saturation - batch		17	conc regression	vSH20151120			3.75851	(used in Models i and ii)
1335	SH	20151124		0	3.02279	0.626052	saturation - batch		26	conc regression	vSH20151124	unsure about end time
1335	SH	20151229		0	3.56314	0.325697	saturation - batch		24	conc regression	vSH20151229
1335	SH	20160126	A1	0	3.43559	0.189246	saturation - batch		20	conc regression	vSH20160126
1335	SH	20160126	A2	0	3.66081	0.184869	saturation - batch		20	conc regression	vSH20160126
1335	SH	20160126	A3	0	3.67645	0.137594	saturation - batch		20	conc regression	vSH20160126
1335	HM	20151108		0	3.62697	0.0426511	saturation - batch		26	conc regression	vHM20151108redconsumption
1335	HM	20151129		0	4.12094	0.306086	saturation - batch			conc regression	vHM20151129redconsumption	unsure about end time
1335	HM	20151202		0	4.70382	0.124736	saturation - batch		30	conc regression	vHM20151202redconsumption
1335	SH	20150724	A1	0.495734	8.47581	0.472621	exponential - batch	0	4.5	time regression	xSH2015724_RegressionPoor
1335	SH	20150724	A2	0.505228	8.07694	0.384582	exponential - batch	0	4.5	time regression	xSH2015724_RegressionPoor
1335	SH	20150724	A3	0.474399	7.62047	0.405479	exponential - batch	0	4.5	time regression	xSH2015724_RegressionPoor
1335	SH	20151210	a	0.417954	7.6862	0.73785	exponential - batch	0	4	time regression	vSH20151210
1335	SH	20151210	b	0.417268	6.6472	0.425099	exponential - batch	0	4	time regression	vSH20151210
1335	SH	20160107	A	0.393884	7.99017	0.646671	exponential - batch	0	6	time regression	vSH20160107
1335	SH	20160107	B	0.390291	9.1133	0.946274	exponential - batch	0	6	time regression	vSH20160107
1657	SH	20160620	1	0.0866434	5.07897	0.65945	chemostat	9	26	steady state	v20160620\6-20-16_R_chemo_comp
1657	SH	20160620	5	0.0866434	5.57029	0.990455	chemostat	9	26	steady state	v20160620\6-20-16_R_chemo_comp
1335	SH	20160726	5	0.0866434	5.52443	1.15238	chemostat	12	26	steady state	v20160726\7-26-16_R_chemo
1335	SH	20160726	6	0.0866434	5.81021	1.56622	chemostat	12	26	steady state	v20160726\7-26-16_R_chemo
1335	SH	20161102	1	0.231049	5.86224	0.465238	chemostat	17	25	steady state	v20161102\11-2-16_R_chemo_varyDT_ws
1335	SH	20161102	2	0.231049	6.11936	0.206274	chemostat	17	25	steady state	v20161102\11-2-16_R_chemo_varyDT_ws
1335	SH	20161102	4	0.126027	4.93272	0.423192	chemostat	17	25	steady state	v20161102\11-2-16_R_chemo_varyDT_ws
1335	SH	20161102	5	0.126027	5.0812	1.07395	chemostat	17	25	steady state	v20161102\11-2-16_R_chemo_varyDT_ws
1335	SH	20161102	6	0.126027	4.73928	0.530535	chemostat	17	25	steady state	v20161102\11-2-16_R_chemo_varyDT_ws
1335	SH	20170517	1	0.0866434	5.09665	0.548767	chemostat	14	26	steady state	2017-05-17_R_chemo
1335	SH	20170622	1	0.116	5.55521	0.558968	chemostat	17	26	steady state	2017-06-22_R_6hrDT
1335	SH	20170622	2	0.116	5.99903	0.813904	chemostat	17	26	steady state	2017-06-22_R_6hrDT
				chemostat ave	5.44746	(used in Model iii)
				2std	0.904818
				n	12
				GR	avg	2*std	N	2*SEM
			exponential	0.442108	7.9443	1.53248	7	0.579221
			3hr	0.231049	5.9908	0.363622	2	0.257119
			5.5hr	0.126027	4.91773	0.342905	3	0.197976
			6hr	0.116	5.77712	0.627662	2	0.443824
			8hr	0.0866434	5.41611	0.637598	5	0.285143
			saturation	0	3.75851	0.950956	9	0.316985
