# Supplementary material for: Uncovering and resolving challenges of quantitative modeling in a simplified community of interacting cells
Source: PLoS Biol. 2019 Feb 22;17(2):e3000135. doi: 10.1371/journal.pbio.3000135 (PMC6402699; doi:10.1371/journal.pbio.3000135)
Supplement: S6 Data — (XLSX) [file pbio.3000135.s048.xlsx]

## Sheet: Sheet1
Time (hr)	chemostat, intracellular lys (fmole/cell)			starved, intracellular lys (fmole/cell)
0	2.87			2.87
24	19.76	19.76	19.76	17.74	19.98	18.79
34	63.85	58.4	40.39	30.74	21.5	27.35
48	40.82	39.99	36.71	20.38	27.73	33.08
72	52.03	55.22	50.31	29.78	24.87	35.7
82	51.05	61.41	49.55	30.69	35.43	32.87
96	42.8	53.89	45.48	39.26	31.95	24.02
