# Supplementary material for: Uncovering and resolving challenges of quantitative modeling in a simplified community of interacting cells
Source: PLoS Biol. 2019 Feb 22;17(2):e3000135. doi: 10.1371/journal.pbio.3000135 (PMC6402699; doi:10.1371/journal.pbio.3000135)
Supplement: S6 Table — (XLSX) [file pbio.3000135.s032.xlsx]

## Sheet: 1340_consumption
Strain	Experimenter	Date	replicate	birth (/hr)	fmole/new cell	2*sd/se	Culture condition	begin (hr)	end (hr)	Nutrient	Analysis Method	Notes	Source
1340	HM	20151029		0	1.02045	0.0171755	saturation - batch			ade	dif conc regression	unsure how long, I think ~48hr	20151029_ade_consump_sat_HM
1340	HM	20151118		0	0.837716	0.023672	saturation - batch			ade	dif conc regression	unsure how long, I think ~48hr	20151118_ade_consump_sat_HM
1340	HM	20151126		0	1.01335	0.0424116	saturation - batch			ade	dif conc regression	unsure how long, I think ~48hr	20151126_ade_consump_sat_HM
1340	SH	20150805	A	0.420117	3.84965	0.206393	exponential - batch			ade	tmpt regression		20150805_ade_consump_exp_SH
1340	SH	20150805	B	0.417988	3.7429	0.347519	exponential - batch			ade	tmpt regression		20150805_ade_consump_exp_SH
1340	SH	20150805	C	0.439424	3.88632	0.274407	exponential - batch			ade	tmpt regression		20150805_ade_consump_exp_SH
1340	SH	20170822	1	0.099021	3.53117	0.479215	chemostat, T2=7	29	53	hyp	steady state		C:\Users\sfhart\Dropbox\Sam\QuantifyingInteractions\Fig\Gchemostat\2017-08-22_G_chemo
1340	SH	20170822	2	0.115525	3.26738	0.0836155	chemostat, T2=6	29	53	hyp	steady state		C:\Users\sfhart\Dropbox\Sam\QuantifyingInteractions\Fig\Gchemostat\2017-08-22_G_chemo
1340	SH	20170822	3	0.099021	3.32907	0.344358	chemostat, T2=7	29	53	hyp	steady state		C:\Users\sfhart\Dropbox\Sam\QuantifyingInteractions\Fig\Gchemostat\2017-08-22_G_chemo
1340	SH	20170822	4	0.115525	3.15808	0.21002	chemostat, T2=6	29	53	hyp	steady state		C:\Users\sfhart\Dropbox\Sam\QuantifyingInteractions\Fig\Gchemostat\2017-08-22_G_chemo
1340	SH	20170822	5	0.099021	3.35428	0.432338	chemostat, T2=7	29	53	hyp	steady state		C:\Users\sfhart\Dropbox\Sam\QuantifyingInteractions\Fig\Gchemostat\2017-08-22_G_chemo
1340	SH	20170822	6	0.115525	3.05294	0.187998	chemostat, T2=6	29	53	hyp	steady state		C:\Users\sfhart\Dropbox\Sam\QuantifyingInteractions\Fig\Gchemostat\2017-08-22_G_chemo
1340	SH	20170822	7	0.099021	3.54052	0.494655	chemostat, T2=7	29	53	hyp	steady state		C:\Users\sfhart\Dropbox\Sam\QuantifyingInteractions\Fig\Gchemostat\2017-08-22_G_chemo
1340	SH	20170822	8	0.115525	2.90984	0.217609	chemostat, T2=6	29	53	hyp	steady state		C:\Users\sfhart\Dropbox\Sam\QuantifyingInteractions\Fig\Gchemostat\2017-08-22_G_chemo
1340	SH	20170719	2	0.0866434	3.58179	0.557272	chemostat, T2=8	30	54	hyp	steady state		C:\Users\sfhart\Dropbox\Sam\QuantifyingInteractions\Fig\Gchemostat\2017-07-19_G_6hrDT
1340	SH	20170719	3	0.099021	3.31079	0.471565	chemostat, T2=7	30	54	hyp	steady state		C:\Users\sfhart\Dropbox\Sam\QuantifyingInteractions\Fig\Gchemostat\2017-07-19_G_6hrDT
1340	SH	20170719	4	0.099021	3.31396	0.698055	chemostat, T2=7	30	54	hyp	steady state		C:\Users\sfhart\Dropbox\Sam\QuantifyingInteractions\Fig\Gchemostat\2017-07-19_G_6hrDT
1340	SH	20170719	5	0.115525	2.98922	0.186036	chemostat, T2=6	30	54	hyp	steady state		C:\Users\sfhart\Dropbox\Sam\QuantifyingInteractions\Fig\Gchemostat\2017-07-19_G_6hrDT
1340	SH	20170719	6	0.115525	2.89503	0.154373	chemostat, T2=6	30	54	hyp	steady state		C:\Users\sfhart\Dropbox\Sam\QuantifyingInteractions\Fig\Gchemostat\2017-07-19_G_6hrDT
1340	SH	20170719	7	0.128361	2.87707	0.269344	chemostat, T2=5.4	30	54	hyp	steady state		C:\Users\sfhart\Dropbox\Sam\QuantifyingInteractions\Fig\Gchemostat\2017-07-19_G_6hrDT
1340	SH	20170719	8	0.128361	2.77391	0.395109	chemostat, T2=5.4	30	54	hyp	steady state		C:\Users\sfhart\Dropbox\Sam\QuantifyingInteractions\Fig\Gchemostat\2017-07-19_G_6hrDT
1340	SH	20170627	1	0.0866434	3.72998	0.85076	chemostat, T2=8	47	72	hyp	steady state		C:\Users\sfhart\Dropbox\Sam\QuantifyingInteractions\Fig\Gchemostat\2017-06-27_G_6hrDT
1340	SH	20170627	2	0.0866434	3.53254	0.855923	chemostat, T2=8	47	72	hyp	steady state		C:\Users\sfhart\Dropbox\Sam\QuantifyingInteractions\Fig\Gchemostat\2017-06-27_G_6hrDT
1340	SH	20170627	3	0.115525	3.14492	0.359614	chemostat, T2=6	47	72	hyp	steady state		C:\Users\sfhart\Dropbox\Sam\QuantifyingInteractions\Fig\Gchemostat\2017-06-27_G_6hrDT
1340	SH	20170627	4	0.115525	3.02446	0.22601	chemostat, T2=6	47	72	hyp	steady state		C:\Users\sfhart\Dropbox\Sam\QuantifyingInteractions\Fig\Gchemostat\2017-06-27_G_6hrDT
1340	SH	20170627	5	0.128361	2.93792	0.574287	chemostat, T2=5.4	47	72	hyp	steady state		C:\Users\sfhart\Dropbox\Sam\QuantifyingInteractions\Fig\Gchemostat\2017-06-27_G_6hrDT
1340	SH	20170627	6	0.128361	2.83944	0.26401	chemostat, T2=5.4	47	72	hyp	steady state		C:\Users\sfhart\Dropbox\Sam\QuantifyingInteractions\Fig\Gchemostat\2017-06-27_G_6hrDT
1340	SH	20170228	1	0.0866434	2.54376	1.05647	chemostat, T2=8	22	71	hyp	steady state		C:\Users\sfhart\Dropbox\Sam\QuantifyingInteractions\Fig\Gchemostat\20170228e\2017-02-28_chemo-starve
1340	SH	20170228	2	0.0866434	2.56495	0.948368	chemostat, T2=8	22	71	hyp	steady state		C:\Users\sfhart\Dropbox\Sam\QuantifyingInteractions\Fig\Gchemostat\20170228e\2017-02-28_chemo-starve
1340	SH	20170228	3	0.0866434	2.45282	1.04021	chemostat, T2=8	22	71	hyp	steady state		C:\Users\sfhart\Dropbox\Sam\QuantifyingInteractions\Fig\Gchemostat\20170228e\2017-02-28_chemo-starve
1340	SH	20170228	7	0.0866434	2.8428	0.938464	chemostat, T2=8	22	71	hyp	steady state		C:\Users\sfhart\Dropbox\Sam\QuantifyingInteractions\Fig\Gchemostat\20170228e\2017-02-28_chemo-starve
1340	SH	20170228	8	0.0866434	2.63823	0.510318	chemostat, T2=8	22	71	hyp	steady state		C:\Users\sfhart\Dropbox\Sam\QuantifyingInteractions\Fig\Gchemostat\20170228e\2017-02-28_chemo-starve
1340	SH	20170214	1	0.0866434	3.06876	0.316541	chemostat, T2=8	24	72	hyp	steady state		C:\Users\sfhart\Dropbox\Sam\QuantifyingInteractions\Fig\Gchemostat\20170228e\2017-02-14_chemo-starve
1340	SH	20170214	2	0.0866434	3.35495	0.520665	chemostat, T2=8	24	72	hyp	steady state		C:\Users\sfhart\Dropbox\Sam\QuantifyingInteractions\Fig\Gchemostat\20170228e\2017-02-14_chemo-starve
1340	SH	20170214	3	0.0866434	3.36687	0.726173	chemostat, T2=8	24	72	hyp	steady state		C:\Users\sfhart\Dropbox\Sam\QuantifyingInteractions\Fig\Gchemostat\20170228e\2017-02-14_chemo-starve
1340	SH	20170214	4	0.173287	2.64684	0.743181	chemostat, T2=4	24	72	hyp	steady state		C:\Users\sfhart\Dropbox\Sam\QuantifyingInteractions\Fig\Gchemostat\20170228e\2017-02-14_chemo-starve
1340	SH	20170214	5	0.173287	2.5149	0.632414	chemostat, T2=4	24	72	hyp	steady state		C:\Users\sfhart\Dropbox\Sam\QuantifyingInteractions\Fig\Gchemostat\20170228e\2017-02-14_chemo-starve
1340	SH	20170214	6	0.173287	2.51836	0.401021	chemostat, T2=4	24	72	hyp	steady state		C:\Users\sfhart\Dropbox\Sam\QuantifyingInteractions\Fig\Gchemostat\20170228e\2017-02-14_chemo-starve
			chemostat	ave	3.05024	(used in Model iii)
			chemostat	2*stdev	0.720504
			chemostat	n	32
			Summary	gr	avg	2*stdev	N	2*SEM
			Sat	0	0.957171	0.207023	3	0.119525		(used in Models i and ii)
			8hr	0.0866434	3.06159	0.944659	11	0.284825
			7hr	0.099021	3.39663	0.217931	6	0.08897
			6hr	0.115525	3.05523	0.257174	8	0.0909247
			5.4hr	0.128361	2.85709	0.137424	4	0.0687121
			4hr	0.173287	2.56003	0.150396	3	0.086831
			Exp	0.425843	3.82629	0.14902	3	0.0860368
