# Supplementary material for: Uncovering and resolving challenges of quantitative modeling in a simplified community of interacting cells
Source: PLoS Biol. 2019 Feb 22;17(2):e3000135. doi: 10.1371/journal.pbio.3000135 (PMC6402699; doi:10.1371/journal.pbio.3000135)
Supplement: S7 Data — (XLSX) [file pbio.3000135.s049.xlsx]

## Sheet: Fig7A
Time	Total	Dead	Total Live	Blue	Green	Red	Yellow	L-A+	A-L+
hr	cell #	cell #	cell #	cell #	cell #	cell #	cell #	cell #	cell #
0	35371.5	257.264	35189.9	9274.8	7784.37	8936.29	9194.46	18211.1	16978.8
21	60888	4369.12	56677.5	16969.5	11593.9	16435.3	11678.7	33404.8	23272.7
21	74455.2	3802.72	70748.6	22435.4	12769.9	21300.2	14243	43735.7	27012.9
28	58980.5	4501.06	54497.9	14001.7	12063.9	14237.6	14194.8	28239.2	26258.7
28	79981.1	6332.14	73740.8	20364.6	15685.2	20269.1	17421.9	40633.7	33107.1
46	112349	15835.9	96592.1	19642.5	29144.9	16783.4	31021.3	36425.9	60166.2
46	106699	16927.1	89899.3	17196.3	26882.7	14720	31100.2	31916.3	57982.9
69.5	2.01586e+06	36755.2	1.98096e+06	400431	676479	326311	577737	726741	1.25422e+06
69.5	1.60386e+06	41983.5	1.56282e+06	328058	484358	264332	486075	592390	970433
91	9.23165e+06	75974.6	9.09802e+06	1.45634e+06	3.18629e+06	1.35264e+06	3.10274e+06	2.80899e+06	6.28903e+06
91	1.11799e+07	105047	1.10609e+07	2.0103e+06	3.8337e+06	1.7903e+06	3.42664e+06	3.8006e+06	7.26034e+06
99	2.13164e+07	243211	2.10802e+07	4.93351e+06	6.00053e+06	4.65548e+06	5.49072e+06	9.589e+06	1.14912e+07
99	3.8139e+07	427947	3.76721e+07	9.64632e+06	1.11741e+07	8.28228e+06	8.56937e+06	1.79286e+07	1.97435e+07
Bold: plotted

## Sheet: Fig7B
	community growth rate (/hr)
		ave	2std
calculated, borrowed parameters	0.0243
calculated, parameters of batch cultures	0.162
calculated, parameters of chemostats	0.1
spatial sim, parameters of chemostats	0.098
Spatial experiment	0.107	0.110455	0.0117086
Spatial experiment	0.115
Spatial experiment	0.111
Spatial experiment	0.104
Spatial experiment	0.105
Spatial experiment	0.114
Spatial experiment	0.12
Spatial experiment	0.106
Spatial experiment	0.112
Spatial experiment	0.118
Spatial experiment	0.103
