# Supplementary material for: Uncovering and resolving challenges of quantitative modeling in a simplified community of interacting cells
Source: PLoS Biol. 2019 Feb 22;17(2):e3000135. doi: 10.1371/journal.pbio.3000135 (PMC6402699; doi:10.1371/journal.pbio.3000135)
Supplement: S7 Table — (XLSX) [file pbio.3000135.s033.xlsx]

## Sheet: Fig5C_release
Strain	Experimenter	Date	replicate	birth (/hr)	|death| (/hr)	death 2*SEM	Release rate	release 2*SEM	Culture	begin (hr)	end (hr)	Analysis Method	Source	T2 (hr)
1335	HM	20151212	1	0	0.0361003	0.0195424	0.255948	0.0159676	batch-starve	0	28	Regression	vR_release_starve\vHM - 1212215redrelease_ws
1335	HM	20151212	2	0	0.0535524	0.0167839	0.303513	0.0202936	batch-starve	0	31	Regression			Release rate (fmole/cell/hr)	Ave	2stdev	n	2SEM
1335	HM	20151212	3	0	0.0521592	0.0158797	0.286924	0.0241526	batch-starve	0	35	Regression			starvation	0.260519	0.0785854	15	0.0202907
1335	SH	20151230	A	0	0.0413351	0.0224957	0.23553	0.0185102	batch-starve	0	24	Regression	vR_release_starve\vSH - 12-30-15_RA		8 hr chemo	0.309209	0.0784678	4	0.0392339
1335	SH	20151208	A	0	0.0509194	0.0262343	0.212676	0.00566906	batch-starve	0	24	Regression	vR_release_starve\vSH - 12-8-15_RA		5.5~6 hr chemo	0.256083	0.0105725	5	0.00472816
1335	SH	20151208	B	0	0.0536129	0.0280812	0.207081	0.00760288	batch-starve	0	24	Regression			Final (Model iii)	0.26771	0.0776667	24	0.0158537
1335	SH	20151109	A	0	0.0604546	0.0277656	0.219907	0.014681	batch-starve	0	25	Regression	vR_release_starve\vSH - 11-9-15_RA
1335	SH	20151109	N	0	0.0699559	0.0225399	0.245395	0.0183443	batch-starve	0	25	Regression
1335	SH	20150603	A	0	0.0534774	0.0302465	0.257483	0.0199401	batch-starve	0	24	Regression	vR_release_starve\vSH - 6-3-15 release assay		Ave death rate during starvation (/hr, used in Models i and ii)
1335	SH	20150603	G	0	0.0518376	0.0210872	0.233736	0.00656006	batch-starve	0	24	Regression			0.0555083
1335	SH	20150603	M	0	0.0566875	0.0226964	0.272624	0.0233576	batch-starve	0	24	Regression
1335	SH	20150603	S	0	0.0444273	0.0388595	0.271021	0.0249082	batch-starve	0	24	Regression
1335	SH	20150519	A	0	0.0573135	0.00846889	0.303287	0.0250415	batch-starve	0	24	Regression	vR_release_starve\vSH - 5-19-15 release assay setup
1335	SH	20150519	X	0	0.0868389	0.0211347	0.250054	0.0110113	batch-starve	0	24	Regression
1335	SH/JP	20150226	X	0	0.0639526	0.0235786	0.352601	0.0146224	batch-starve	0	27	Regression	vR_release_starve\vSH-JP - 150226_release
1657	SH	20160620	5	0.0866434	0.00244929	0.000242121	0.353226	0.0154765	chemostat	0	26	Regression	Rchemostat\v20160620\6-20-16_R_chemo_comp	8
1335	SH	20160726	5	0.0866434	0.00137074	0.000743361	0.30255	0.0106159	chemostat	0	26	Regression	Rchemostat\v20160726\7-26-16_R_chemo	8
1335	SH	20160726	6	0.0866434	0.00160324	0.000768094	0.321659	0.00533176	chemostat	0	26	Regression		8
1335	SH	20161102	1	0.231049	0.000976679	0.000137861	0.109049	0.00160554	chemostat	0	25	Regression	Rchemostat\v20161102\11-2-16_R_chemo_varyDT_ws	3
1335	SH	20161102	2	0.231049	0.000624441	9.78192e-05	0.114415	0.00482629	chemostat	0	25	Regression		3
1335	SH	20161102	4	0.126027	0.00347947	0.00261619	0.256832	0.00821112	chemostat	0	25	Regression		5.5
1335	SH	20161102	5	0.126027	0.00166067	0.00108818	0.261946	0.00481428	chemostat	0	25	Regression		5.5
1335	SH	20161102	6	0.126027	0.00198975	0.000991923	0.247716	0.0123281	chemostat	0	25	Regression		5.5
1335	SH	20170517	1	0.0866434	0.00313191	0.00017646	0.259399	0.0102631	chemostat	0	26	Regression	Rchemostat\2017-05-17_R_chemo	8
1335	SH	20170622	1	0.116	0.00272081	0.000671556	0.255332	0.0272712	chemostat	0	26	Regression	Rchemostat\2017-06-22_R_6hrDT	5.97541
1335	SH	20170622	2	0.116	0.00358403	0.000480822	0.258589	0.0192311	chemostat	0	26	Regression		5.97541
1335	SH	20171208	1	0.479203			0.00278599		exponential				Release_assays\2017-12-08_exponential_release_R-G.xlsx
1335	SH	20171208	2	0.472377			0.00263713		exponential				Release_assays\2017-12-08_exponential_release_R-G.xlsx
1335	SH	20171208	3	0.472829			0.00264868		exponential				Release_assays\2017-12-08_exponential_release_R-G.xlsx
			chemo death rate ave		0.00244332	(Model iii)
				2stdev	0.00167338
				n	9
Calculated from steady state, redundant with above, not plotted.
1657	SH	20160620	5	0.0866434			0.305723	0.0579328	chemostat	0	26	Steady state	Rchemostat\v20160620\6-20-16_R_chemo_comp
1335	SH	20160726	5	0.0866434			0.257013	0.033328	chemostat	0	26	Steady state	Rchemostat\v20160726\7-26-16_R_chemo
1335	SH	20160726	6	0.0866434			0.267555	0.0276323	chemostat	0	26	Steady state
1335	SH	20161102	1	0.231049			0.164608	0.0698767	chemostat	0	25	Steady state	Rchemostat\v20161102\11-2-16_R_chemo_varyDT_ws
1335	SH	20161102	2	0.231049			0.160346	0.0536136	chemostat	0	25	Steady state
1335	SH	20161102	4	0.126027			0.271739	0.0569984	chemostat	0	25	Steady state
1335	SH	20161102	5	0.126027			0.268582	0.0482264	chemostat	0	25	Steady state
1335	SH	20161102	6	0.126027			0.264681	0.0735765	chemostat	0	25	Steady state
1335	SH	20170517	1	0.0866434			0.213442	0.0419708	chemostat	0	26	Steady state	Rchemostat\2017-05-17_R_chemo
1335	SH	20170622	1	0.116			0.27687	0.0686601	chemostat	0	26	Steady state	Rchemostat\2017-06-22_R_6hrDT
1335	SH	20170622	2	0.116			0.26545	0.0622664	chemostat	0	26	Steady state
