# Supplementary material for: Uncovering and resolving challenges of quantitative modeling in a simplified community of interacting cells
Source: PLoS Biol. 2019 Feb 22;17(2):e3000135. doi: 10.1371/journal.pbio.3000135 (PMC6402699; doi:10.1371/journal.pbio.3000135)
Supplement: S8 Data — (XLSX) [file pbio.3000135.s050.xlsx]

## Sheet: Sheet1
time	Live Cells	L-A+	A-L+, not prestarved		time	Live Cells	L-A+	A-L+, prestarved
hr	cells/ml	cells/ml	cells/ml		hr	cells/ml	cells/ml	cells/ml
0	100000	50000	50000		0	100000	50000	50000
4	173000	85000	86400		4	142000	91400	47700
20.25	538000	75600	455000		20.25	216000	102000	109000
27.5	530000	63500	440000		27.5	313000	111000	190000
32.25	560000	64300	465000		32.25	398000	111000	271000
45.25	636000	82500	506000		45.25	1620000	998000	560000
