# Supplementary material for: Uncovering and resolving challenges of quantitative modeling in a simplified community of interacting cells
Source: PLoS Biol. 2019 Feb 22;17(2):e3000135. doi: 10.1371/journal.pbio.3000135 (PMC6402699; doi:10.1371/journal.pbio.3000135)
Supplement: S8 Table — (XLSX) [file pbio.3000135.s034.xlsx]

## Sheet: 1340
Strain	Experimenter	Date	replicate	growth (/hr)	|death| (/hr)	Release rate	release 2SEM	Doubling time (hr)	begin (hr)	end (hr)	Volume	Pre-growth/limitation	Analysis Method	Starve device	Source	Notes
1340	SH	20170228	A	0	0.000940846	0.42396	0.0272066	starve - batch	24	96	10	hyp	live regression	18mm tubes	C:\Users\sfhart\Dropbox\Sam\QuantifyingInteractions\Fig\Release_assays\vG_release_starve\2017-02-28_chemo-starve
1340	SH	20170228	B	0	0.00138587	0.340486	0.0172183	starve - batch	24	96	10	hyp	live regression	18mm tubes	C:\Users\sfhart\Dropbox\Sam\QuantifyingInteractions\Fig\Release_assays\vG_release_starve\2017-02-28_chemo-starve
1340	SH	20170228	C	0	0.00377046	0.363205	0.00869669	starve - batch	24	96	10	hyp	live regression	18mm tubes	C:\Users\sfhart\Dropbox\Sam\QuantifyingInteractions\Fig\Release_assays\vG_release_starve\2017-02-28_chemo-starve
1340	SH	20170228	F	0	0.00400974	0.572529	0.0473435	starve - batch	24	69	40	hyp	live regression	flask	C:\Users\sfhart\Dropbox\Sam\QuantifyingInteractions\Fig\Release_assays\vG_release_starve\2017-02-28_chemo-starve
1340	SH	20170214	A	0	0.00802912	0.637659	0.0585039	starve - batch	24	72	40	hyp	live regression	flask	C:\Users\sfhart\Dropbox\Sam\QuantifyingInteractions\Fig\Release_assays\vG_release_starve\2017-02-14_chemo+starve
1340	SH	20170214	B	0	0.00768544	0.615105	0.0304805	starve - batch	24	72	40	hyp	live regression	flask	C:\Users\sfhart\Dropbox\Sam\QuantifyingInteractions\Fig\Release_assays\vG_release_starve\2017-02-14_chemo+starve
1340	SH	20170214	C	0	0.00913418	0.67256	0.0494493	starve - batch	24	72	40	hyp	live regression	flask	C:\Users\sfhart\Dropbox\Sam\QuantifyingInteractions\Fig\Release_assays\vG_release_starve\2017-02-14_chemo+starve
1340	SH	20170214	4	0.173287	0.00563458	0.0896739	0.0011931	4	10	72	19	hyp	regression	flask	C:\Users\sfhart\Dropbox\Sam\QuantifyingInteractions\Fig\Gchemostat\20170228e\2017-02-14_chemo-starve
1340	SH	20170214	5	0.173287	0.00594699	0.0917948	0.00264227	4	10	72	19	hyp	regression	flask	C:\Users\sfhart\Dropbox\Sam\QuantifyingInteractions\Fig\Gchemostat\20170228e\2017-02-14_chemo-starve
1340	SH	20170214	6	0.173287	0.00337482	0.0519959	0.00177962	4	10	72	19	hyp	regression	flask	C:\Users\sfhart\Dropbox\Sam\QuantifyingInteractions\Fig\Gchemostat\20170228e\2017-02-14_chemo-starve
1340	SH	20170719	7	0.128361	0.0135643	0.465259	0.0176393	5.4	24	54	19	hyp	regression	18mm tubes	C:\Users\sfhart\Dropbox\Sam\QuantifyingInteractions\Fig\Gchemostat\2017-07-19_G_6hrDT
1340	SH	20170719	8	0.128361	0.0106869	0.400019	0.0124623	5.4	24	54	19	hyp	regression	18mm tubes	C:\Users\sfhart\Dropbox\Sam\QuantifyingInteractions\Fig\Gchemostat\2017-07-19_G_6hrDT
1340	SH	20170627	5	0.128361	0.0121321	0.349954	0.0244752	5.4	0	72	19	hyp	regression	18mm tubes	C:\Users\sfhart\Dropbox\Sam\QuantifyingInteractions\Fig\Gchemostat\2017-06-27_G_6hrDT
1340	SH	20170627	6	0.128361	0.010973	0.313341	0.00777515	5.4	0	72	19	hyp	regression	18mm tubes	C:\Users\sfhart\Dropbox\Sam\QuantifyingInteractions\Fig\Gchemostat\2017-06-27_G_6hrDT
1340	SH	20170822	2	0.115525	0.0167149	0.74062	0.0164663	6	23	53	19	hyp	regression	18mm tubes	C:\Users\sfhart\Dropbox\Sam\QuantifyingInteractions\Fig\Gchemostat\2017-08-22_G_chemo
1340	SH	20170822	4	0.115525	0.0127964	0.536806	0.0201454	6	23	53	19	hyp	regression	18mm tubes	C:\Users\sfhart\Dropbox\Sam\QuantifyingInteractions\Fig\Gchemostat\2017-08-22_G_chemo
1340	SH	20170822	6	0.115525	0.0183973	0.612679	0.010271	6	23	53	19	hyp	regression	18mm tubes	C:\Users\sfhart\Dropbox\Sam\QuantifyingInteractions\Fig\Gchemostat\2017-08-22_G_chemo
1340	SH	20170822	8	0.115525	0.0134414	0.494536	0.0175922	6	23	53	19	hyp	regression	18mm tubes	C:\Users\sfhart\Dropbox\Sam\QuantifyingInteractions\Fig\Gchemostat\2017-08-22_G_chemo
1340	SH	20170719	5	0.115525	0.0164032	0.575056	0.0277438	6	24	54	19	hyp	regression	18mm tubes	C:\Users\sfhart\Dropbox\Sam\QuantifyingInteractions\Fig\Gchemostat\2017-07-19_G_6hrDT
1340	SH	20170719	6	0.115525	0.0115891	0.469366	0.026563	6	24	54	19	hyp	regression	18mm tubes	C:\Users\sfhart\Dropbox\Sam\QuantifyingInteractions\Fig\Gchemostat\2017-07-19_G_6hrDT
1340	SH	20170627	3	0.115525	0.0121576	0.402077	0.0274818	6	0	72	19	hyp	regression	18mm tubes	C:\Users\sfhart\Dropbox\Sam\QuantifyingInteractions\Fig\Gchemostat\2017-06-27_G_6hrDT
1340	SH	20170627	4	0.115525	0.0124526	0.422635	0.0144007	6	0	72	19	hyp	regression	18mm tubes	C:\Users\sfhart\Dropbox\Sam\QuantifyingInteractions\Fig\Gchemostat\2017-06-27_G_6hrDT
1340	SH	20170822	1	0.099021	0.0164296	0.909534	0.0249585	7	23	53	19	hyp	regression	18mm tubes	C:\Users\sfhart\Dropbox\Sam\QuantifyingInteractions\Fig\Gchemostat\2017-08-22_G_chemo
1340	SH	20170822	3	0.099021	0.0162791	0.715702	0.0256311	7	23	53	19	hyp	regression	18mm tubes	C:\Users\sfhart\Dropbox\Sam\QuantifyingInteractions\Fig\Gchemostat\2017-08-22_G_chemo
1340	SH	20170822	5	0.099021	0.0163787	0.755543	0.0391356	7	23	53	19	hyp	regression	18mm tubes	C:\Users\sfhart\Dropbox\Sam\QuantifyingInteractions\Fig\Gchemostat\2017-08-22_G_chemo
1340	SH	20170822	7	0.099021	0.0169726	0.884725	0.0317465	7	23	53	19	hyp	regression	18mm tubes	C:\Users\sfhart\Dropbox\Sam\QuantifyingInteractions\Fig\Gchemostat\2017-08-22_G_chemo
1340	SH	20170719	3	0.099021	0.0140233	0.708776	0.0778654	7	24	54	19	hyp	regression	18mm tubes	C:\Users\sfhart\Dropbox\Sam\QuantifyingInteractions\Fig\Gchemostat\2017-07-19_G_6hrDT
1340	SH	20170719	4	0.099021	0.0164648	0.694189	0.0184729	7	24	54	19	hyp	regression	18mm tubes	C:\Users\sfhart\Dropbox\Sam\QuantifyingInteractions\Fig\Gchemostat\2017-07-19_G_6hrDT
1340	SH	20170719	2	0.0866434	0.0189986	1.05518	0.0267953	8	24	54	19	hyp	regression	18mm tubes	C:\Users\sfhart\Dropbox\Sam\QuantifyingInteractions\Fig\Gchemostat\2017-07-19_G_6hrDT
1340	SH	20170627	1	0.0866434	0.0217703	1.06665	0.0890738	8	0	72	19	hyp	regression	18mm tubes	C:\Users\sfhart\Dropbox\Sam\QuantifyingInteractions\Fig\Gchemostat\2017-06-27_G_6hrDT
1340	SH	20170627	2	0.0866434	0.0137921	0.754042	0.0644084	8	0	72	19	hyp	regression	18mm tubes	C:\Users\sfhart\Dropbox\Sam\QuantifyingInteractions\Fig\Gchemostat\2017-06-27_G_6hrDT
1340	SH	20170228	1	0.0866434	0.0150736	0.63019	0.026702	8	10	71	19	hyp	regression	flask	C:\Users\sfhart\Dropbox\Sam\QuantifyingInteractions\Fig\Gchemostat\20170228e\2017-02-28_chemo-starve
1340	SH	20170228	2	0.0866434	0.0155245	0.682082	0.0200998	8	10	71	19	hyp	regression	flask	C:\Users\sfhart\Dropbox\Sam\QuantifyingInteractions\Fig\Gchemostat\20170228e\2017-02-28_chemo-starve
1340	SH	20170228	3	0.0866434	0.0264125	0.726554	0.0425112	8	10	71	19	hyp	regression	flask	C:\Users\sfhart\Dropbox\Sam\QuantifyingInteractions\Fig\Gchemostat\20170228e\2017-02-28_chemo-starve
1340	SH	20170228	7	0.0866434	0.0147548	0.645506	0.036282	8	10	71	19	hyp	regression	flask	C:\Users\sfhart\Dropbox\Sam\QuantifyingInteractions\Fig\Gchemostat\20170228e\2017-02-28_chemo-starve
1340	SH	20170228	8	0.0866434	0.0136846	0.561845	0.0136195	8	10	71	19	hyp	regression	flask	C:\Users\sfhart\Dropbox\Sam\QuantifyingInteractions\Fig\Gchemostat\20170228e\2017-02-28_chemo-starve
1340	SH	20170214	1	0.0866434	0.0137397	0.762178	0.0232675	8	10	72	19	hyp	regression	flask	C:\Users\sfhart\Dropbox\Sam\QuantifyingInteractions\Fig\Gchemostat\20170228e\2017-02-14_chemo-starve
1340	SH	20170214	2	0.0866434	0.0169265	1.19335	0.066727	8	10	72	19	hyp	regression	flask	C:\Users\sfhart\Dropbox\Sam\QuantifyingInteractions\Fig\Gchemostat\20170228e\2017-02-14_chemo-starve
1340	SH	20170214	3	0.0866434	0.0153839	1.00881	0.0684182	8	10	72	19	hyp	regression	flask	C:\Users\sfhart\Dropbox\Sam\QuantifyingInteractions\Fig\Gchemostat\20170228e\2017-02-14_chemo-starve
		chemostat death rate ave (Model iii)			0.0153075		starvation death rate ave		0.00499366	(Used in Models i and ii)
				2stdev	0.00661083
				n	29
chemostat Release rate as a function of growth rate
T2 (hr)	growth (/hr)	Release rate	2*stdev	n	2*SEM	Release rate from regression
starvation		0.517929	0.276799	7	0.10462		Model ii
8	0.0866434	0.826035	0.42865	11	0.129243	0.866305	Model iii
7	0.099021	0.778078	0.189511	6	0.0773675	0.725349	Model iii
6	0.115525	0.531722	0.221778	8	0.0784105	0.537407	Model iii
5.4	0.128361	0.382143	0.131644	4	0.0658221	0.39123	Model iii
4	0.173287	0.0778215	0.0447816	3	0.0258547
			Model iii
			slope:	-11.388
			Intercept:	1.853

## Sheet: ConvertingGrowthToHyp
Release rate as a function of hypoxanthine concentration
T2 (hr)	growth (/hr)	death (/hr)	birth (/hr)	Hyp (uM)	Release rate
	0			0	0.517929
8	0.0866434	0.015	0.101643	0.583104	0.826035
7	0.099021	0.015	0.114021	0.645367	0.778078
6	0.115525	0.015	0.130525	0.731118	0.531722
5.4	0.128361	0.015	0.143361	0.800591	0.382143
4	0.173287	0.015	0.188287	1.07124	0.0778215
	bmaxA	0.44
	nA	1.5
	KA	1.3
