# Supplementary material for: Uncovering and resolving challenges of quantitative modeling in a simplified community of interacting cells
Source: PLoS Biol. 2019 Feb 22;17(2):e3000135. doi: 10.1371/journal.pbio.3000135 (PMC6402699; doi:10.1371/journal.pbio.3000135)
Supplement: S9 Data — (XLSX) [file pbio.3000135.s051.xlsx]

## Sheet: FigS3A
	Ade	Ino	Hyp	Ade	Ino	Hyp
[metabolite], uM	OD	OD	OD	2std	2std	2std
0	0	0	0	0	0.0012	0.0012
2	0.021	0	0.025	0.0023	0.002	0.002
4	0.038	0	0.045	0.005	0.0023	0
8	0.087	0.001	0.094	0.002	0.0012	0.0031
12	0.132	0	0.152	0.017	0.0023	0.0012
16	0.179	0	0.204	0.0204	0.002	0.0147
24	0.294	0	0.308	0.014	0.002	0.0162
32	0.37	0.001	0.371	0.0122	0.002	0.0061

## Sheet: FigS3B
hyp uM	Ino uM	ave rate (/hr)	2std
0	0	0.02	0.01
0.4	0	0.13	0.02
0.6	0	0.1	0.03
1	0	0.17	0.05
2	0	0.31	0.05
10	0	0.42	0.06
20	0	0.44	0.03
30	0	0.42	0.01
0.4	0.4	0.11	0.03
0.6	0.6	0.12	0.06
1	1	0.19	0.05
2	2	0.31	0.04
20	20	0.45	0.06
0.4	4	0.1	0.06
0.6	6	0.12	0.09
1	10	0.17	0.02
2	20	0.29	0.03
20	200	0.43	0.04
