# Supplementary material for: Uncovering and resolving challenges of quantitative modeling in a simplified community of interacting cells
Source: PLoS Biol. 2019 Feb 22;17(2):e3000135. doi: 10.1371/journal.pbio.3000135 (PMC6402699; doi:10.1371/journal.pbio.3000135)
Supplement: S10 Data — (XLSX) [file pbio.3000135.s052.xlsx]

## Sheet: Sheet1
	growth in	growth rate (/hr)
	ade or hyp (uM)	trial 1	trial 2
pregrown in ade, grown in ade	0	0.022	0.007
	0.25	0.141	0.135
	0.5	0.219	0.235
	1	0.305	0.311
	1.75	0.354	0.374
	2.5	0.366	0.415
	5	0.42	0.432
	20	0.477	0.455
pregrown in hyp, grown in hyp	0	0.028	0.005
	0.25	0.061	0.025
	0.5	0.117	0.074
	1	0.207	0.215
	1.75	0.283	0.311
	2.5	0.319	0.335
	5	0.394	0.395
	20	0.444	0.422
pregrown in ade, grown in hyp	0	0.029
	0.25	0.072
	0.5	0.117
	1	0.209
	1.75	0.277
	2.5	0.33
	5	0.396
	20	0.448
pregrown in hyp, grown in ade	0	0.025
	0.25	0.136
	0.5	0.22
	1	0.299
	1.75	0.342
	2.5	0.377
	5	0.416
	20	0.471
