# Supplementary material for: Uncovering and resolving challenges of quantitative modeling in a simplified community of interacting cells
Source: PLoS Biol. 2019 Feb 22;17(2):e3000135. doi: 10.1371/journal.pbio.3000135 (PMC6402699; doi:10.1371/journal.pbio.3000135)
Supplement: S11 Data — (XLSX) [file pbio.3000135.s053.xlsx]

## Sheet: Sheet1
lys (uM)	growth rate (/hr)	2sd growth rate	Extracts?
0	-0.013	0.002	Yes
0.4	0.002	0.001	Yes
0.8	0.038	0	Yes
1.2	0.053	0	Yes
1.6	0.073	0.003	Yes
2	0.116	0.002	Yes
2.5	0.182	0.003	Yes
5	0.409	0.005	Yes
10	0.512	0.012	Yes
0	-0.006	0.001	Yes
0.4	0.011	0.001	Yes
0.8	0.04	0.001	Yes
1.2	0.066	0.001	Yes
1.6	0.107	0.003	Yes
2	0.196	0.004	Yes
5	0.433	0.008	Yes
10	0.526	0.013	Yes
0	-0.005	0.002	No
0.4	0.012	0.002	No
0.8	0.042	0.001	No
1.2	0.07	0.002	No
1.6	0.086	0.004	No
2	0.13	0.004	No
2.5	0.2	0.002	No
5	0.438	0.008	No
10	0.509	0.002	No
0	-0.004	0.002	No
0.4	0.009	0.002	No
0.8	0.045	0.001	No
1.2	0.063	0.002	No
1.6	0.087	0.004	No
2	0.129	0.004	No
2.5	0.203	0.002	No
5	0.437	0.005	No
10	0.505	0.009	No
