# Supplementary material for: Uncovering and resolving challenges of quantitative modeling in a simplified community of interacting cells
Source: PLoS Biol. 2019 Feb 22;17(2):e3000135. doi: 10.1371/journal.pbio.3000135 (PMC6402699; doi:10.1371/journal.pbio.3000135)
Supplement: S12 Data — (XLSX) [file pbio.3000135.s054.xlsx]

## Sheet: S6 FigAB
lys (uM)	growth rate (/hr)		hyp (uM)	growth rate (/hr)
0	0.015		0	0.034
0.1	0.023		0.05	0.031
0.2	0.061		0.1	0.064
0.3	0.084		0.175	0.121
0.4	0.114		0.25	0.186
0.6	0.177		0.325	0.212
0.8	0.23		0.4	0.231
1	0.284		0.5	0.268
2	0.423		0	0.026
0	0.012		0.05	0.031
0.1	0.025		0.1	0.061
0.2	0.064		0.175	0.127
0.3	0.087		0.25	0.179
0.4	0.136		0.325	0.221
0.6	0.198		0.4	0.241
0.8	0.258		0.5	0.27
1	0.312
2	0.434
