# Supplementary material for: Uncovering and resolving challenges of quantitative modeling in a simplified community of interacting cells
Source: PLoS Biol. 2019 Feb 22;17(2):e3000135. doi: 10.1371/journal.pbio.3000135 (PMC6402699; doi:10.1371/journal.pbio.3000135)
Supplement: S13 Data — (XLSX) [file pbio.3000135.s055.xlsx]

## Sheet: S7A
	rep1 0uM lys start	rep1 0uM lys start	rep2 0uM lys start	rep2 0uM lys start	rep1 10-15uM lys start	rep1 10-15uM lys start	rep2 10-15uM lys start	rep2 10-15uM lys start
Time	evo (WY2226)	anc (WY1335)	evo (WY2226)	anc (WY1335)	evo (WY2226)	anc (WY1335)	evo (WY2226)	anc (WY1335)
hr	cells/mL	cells/mL	cells/mL	cells/mL	cells/mL	cells/mL	cells/mL	cells/mL
0	456	4180000	458	4300000	146	1290000	127	1380000
9	4400	3500000	3800	3500000	2200	3500000	3000	3600000
17	110000	2900000	100000	3000000	50000	2800000	55000	3500000
20	270000	2700000	280000	3000000	120000	2800000	160000	2800000
23.3	710000	2700000	760000	2900000	370000	3000000	470000	2800000
26.3	1390000	2350000	1620000	2800000	881000	2840000	1210000	2840000
32	2400000	1260000	2690000	1840000	2190000	1950000	2490000	2010000
44	2310000	254000	2550000	354000	2730000	487000	2900000	478000

## Sheet: S7B
Experimental replicate	Starting lys	percent evolved clones at ~26hr
6/20/2016 #1	0	0.04
7/26/2016 #1a	0	0.2
7/26/2016 #1b	0	0.3
7/26/2016 #2a	10~15	0.1
7/26/2016 #2b	10~15	0
