# Supplementary material for: Uncovering and resolving challenges of quantitative modeling in a simplified community of interacting cells
Source: PLoS Biol. 2019 Feb 22;17(2):e3000135. doi: 10.1371/journal.pbio.3000135 (PMC6402699; doi:10.1371/journal.pbio.3000135)
Supplement: S14 Data — (XLSX) [file pbio.3000135.s056.xlsx]

## Sheet: S8Aleft
	anc (WY1340)	evo (WY1598)	evo (WY2447)	assigned evo	assigned evo	assigned anc	assigned anc	assigned evo	assigned evo	assigned evo
conc	growth rate (/hr)	growth rate (/hr)	growth rate (/hr)	growth rate (/hr)	growth rate (/hr)	growth rate (/hr)	growth rate (/hr)	growth rate (/hr)	growth rate (/hr)	growth rate (/hr)
0	0.013	0.014	0.015	0.013	0.012	0.021	0.02	0.038	0.02	0.05
0.2	0.033	0.126	0.044	0.044	0.046	0.029	0.034	0.036	0.036	0.03
0.4	0.063	0.206	0.111	0.078	0.084	0.038	0.057	0.09	0.088	0.081
0.6	0.093	0.251	0.175	0.15	0.142	0.093	0.102	0.156	0.162	0.13
1	0.145	0.275	0.191	0.18	0.173	0.17	0.171	0.172	0.179	0.162
2	0.264	0.287	0.192	0.173	0.177	0.286	0.307	0.175	0.18	0.19

## Sheet: S8Aright
	growth rate at 0.4uM Hyp	growth rate 2*Stdev	OD after growth in high purine
Strain	(/hr)	(/hr)
1340	0.06	0.01	0.186
1598	0.22	0.01	0.025
1599	0.24	0.01	0.034
1600	0.26	0.02	0.022
2447	0.108	0.01	0.018
31hr isolated clone	0.058	0.004	0.152
31hr isolated clone	0.042	0.008	0.15
31hr isolated clone	0.055	0.004	0.121
31hr isolated clone	0.108	0.01	0.018
31hr isolated clone	0.057	0.004	0.157
31hr isolated clone	0.057	0.006	0.207
31hr isolated clone	0.108	0.006	0.019
31hr isolated clone	0.057	0.002	0.186
31hr isolated clone	0.056	0.002	0.209
31hr isolated clone	0.049	0.002	0.178
31hr isolated clone	0.117	0.012	0.029
31hr isolated clone	0.055	0.002	0.149
31hr isolated clone	0.126	0.01	0.021
31hr isolated clone	0.1	0.006	0.025
31hr isolated clone	0.052	0.004	0.172
31hr isolated clone	0.049	0.002	0.111
31hr isolated clone	0.109	0.012	0.058
31hr isolated clone	0.059	0.002	0.15
31hr isolated clone	0.069	0	0.218
31hr isolated clone	0.061	0.008	0.168
31hr isolated clone	0.056	0.002	0.13
31hr isolated clone	0.06	0.002	0.176
31hr isolated clone	0.128	0.006	0.019
31hr isolated clone	0.123	0.01	0.025
31hr isolated clone	0.075	0.002	0.084
31hr isolated clone	0.057	0.002	0.183
31hr isolated clone	0.064	0.002	0.147
31hr isolated clone	0.061	0.004	0.175
31hr isolated clone	0.247	0.012	0.042
31hr isolated clone	0.14	0.01	0.03
31hr isolated clone	0.129	0.008	0.018
31hr isolated clone	0.122	0.008	0.02
31hr isolated clone	0.065	0.002	0.056
31hr isolated clone	0.111	0.006	0.04
31hr isolated clone	0.052	0.004	0.15
31hr isolated clone	0.061	0.002	0.141
31hr isolated clone	0.055	0.002	0.175
31hr isolated clone	0.115	0.004	0.032
31hr isolated clone	0.068	0.002	0.197
31hr isolated clone	0.057	0.004	0.158
31hr isolated clone	0.098	0.008	0.016
31hr isolated clone	0.103	0.008	0.017
31hr isolated clone	0.058	0.006	0.164
31hr isolated clone	0.056	0.002	0.18
31hr isolated clone	0.063	0.002	0.445
31hr isolated clone	0.062	0.002	0.138

## Sheet: S8B
	OD after growth in high purine
anc (1335)	0.726
evo (1598)	0.051
anc-assigned clone	0.632
anc-assigned clone	0.662
anc-assigned clone	0.675
anc-assigned clone	0.669
anc-assigned clone	0.714
anc-assigned clone	0.734
anc-assigned clone	0.722
anc-assigned clone	0.692
anc-assigned clone	0.655
anc-assigned clone	0.673
anc-assigned clone	0.671
evo-assigned clone	0.029
anc-assigned clone	0.71
anc-assigned clone	0.733
anc-assigned clone	0.727
anc-assigned clone	0.686
anc-assigned clone	0.681
anc-assigned clone	0.685
anc-assigned clone	0.672
evo-assigned clone	0.027
anc-assigned clone	0.707
anc-assigned clone	0.725
anc-assigned clone	0.722
anc-assigned clone	0.688
anc-assigned clone	0.686
anc-assigned clone	0.66
anc-assigned clone	0.666
anc-assigned clone	0.644
anc-assigned clone	0.711
anc-assigned clone	0.735
anc-assigned clone	0.722
anc-assigned clone	0.7
anc-assigned clone	0.666
anc-assigned clone	0.671
anc-assigned clone	0.665
anc-assigned clone	0.638
anc-assigned clone	0.722
anc-assigned clone	0.752
anc-assigned clone	0.737
anc-assigned clone	0.686
anc-assigned clone	0.679
anc-assigned clone	0.672
anc-assigned clone	0.676
anc-assigned clone	0.647

## Sheet: S8C
chr	BinCenterPos	mean coverage	normalized coverage	Ln(2)
Supercontig_1.1	501	122.495	2.7394	1.45386
Supercontig_1.1	1501	82.125	1.8366	0.877037
Supercontig_1.1	2501	101.988	2.2808	1.18954
Supercontig_1.1	3501	97.28	2.1755	1.12135
Supercontig_1.1	4501	183.298	4.0991	2.03531
Supercontig_1.1	5501	156.954	3.51	1.81147
Supercontig_1.1	6501	63.862	1.4282	0.514198
Supercontig_1.1	7501	63.617	1.4227	0.508631
Supercontig_1.1	8501	65.775	1.4709	0.556699
Supercontig_1.1	9501	59.371	1.3277	0.408929
Supercontig_1.1	10501	43.124	0.9644	-0.0522964
Supercontig_1.1	11501	67.128	1.5012	0.586116
Supercontig_1.1	12501	47.349	1.0589	0.0825664
Supercontig_1.1	13501	52.099	1.1651	0.220454
Supercontig_1.1	14501	50.88	1.1378	0.186247
Supercontig_1.1	15501	52.119	1.1655	0.220949
Supercontig_1.1	16501	69.679	1.5582	0.63988
Supercontig_1.1	17501	68.339	1.5283	0.611928
Supercontig_1.1	18501	67.259	1.5041	0.5889
Supercontig_1.1	19501	75.987	1.6993	0.764941
Supercontig_1.1	20501	80.27	1.7951	0.844064
Supercontig_1.1	21501	69.104	1.5454	0.62798
Supercontig_1.1	22501	65.774	1.4709	0.556699
Supercontig_1.1	23501	59.089	1.3214	0.402067
Supercontig_1.1	24501	69.974	1.5648	0.645978
Supercontig_1.1	25501	75.02	1.6777	0.746485
Supercontig_1.1	26501	58.14	1.3002	0.378734
Supercontig_1.1	27501	76.314	1.7066	0.771125
Supercontig_1.1	28501	61.171	1.368	0.452068
Supercontig_1.1	29501	61.108	1.3666	0.450591
Supercontig_1.1	30501	64.394	1.4401	0.526169
Supercontig_1.1	31501	74.152	1.6583	0.729705
Supercontig_1.1	32501	68.753	1.5375	0.620586
Supercontig_1.1	33501	51.415	1.1498	0.201383
Supercontig_1.1	34501	59.464	1.3298	0.411209
Supercontig_1.1	35501	56.371	1.2606	0.334111
Supercontig_1.1	36501	68.186	1.5249	0.608715
Supercontig_1.1	37501	68.046	1.5217	0.605684
Supercontig_1.1	38501	64.762	1.4483	0.53436
Supercontig_1.1	39501	58.493	1.3081	0.387473
Supercontig_1.1	40501	66.219	1.4809	0.566474
Supercontig_1.1	41501	60.986	1.3638	0.447632
Supercontig_1.1	42501	59.799	1.3373	0.419323
Supercontig_1.1	43501	51.863	1.1598	0.213876
Supercontig_1.1	44501	58.178	1.301	0.379621
Supercontig_1.1	45501	62.471	1.3971	0.482435
Supercontig_1.1	46501	59.377	1.3279	0.409147
Supercontig_1.1	47501	64.802	1.4492	0.535257
Supercontig_1.1	48501	63.845	1.4278	0.513794
Supercontig_1.1	49501	54.796	1.2254	0.293253
Supercontig_1.1	50501	73.069	1.6341	0.708496
Supercontig_1.1	51501	66.722	1.4921	0.577344
Supercontig_1.1	52501	73.226	1.6376	0.711583
Supercontig_1.1	53501	67.139	1.5014	0.586308
Supercontig_1.1	54501	57.633	1.2889	0.36614
Supercontig_1.1	55501	54.43	1.2172	0.283566
Supercontig_1.1	56501	52.973	1.1846	0.2444
Supercontig_1.1	57501	61.228	1.3693	0.453439
Supercontig_1.1	58501	68.641	1.535	0.618239
Supercontig_1.1	59501	58.372	1.3054	0.384492
Supercontig_1.1	60501	69.476	1.5537	0.635708
Supercontig_1.1	61501	61.816	1.3824	0.467175
Supercontig_1.1	62501	56.931	1.2732	0.348459
Supercontig_1.1	63501	59.358	1.3274	0.408603
Supercontig_1.1	64501	61.392	1.3729	0.457227
Supercontig_1.1	65501	55.699	1.2456	0.316841
Supercontig_1.1	66501	51.148	1.1438	0.193835
Supercontig_1.1	67501	40.601	0.908	-0.139236
Supercontig_1.1	68501	51.509	1.1519	0.204015
Supercontig_1.1	69501	68.869	1.5401	0.623024
Supercontig_1.1	70501	57.402	1.2837	0.360308
Supercontig_1.1	71501	49.397	1.1047	0.143655
Supercontig_1.1	72501	45.487	1.0172	0.0246034
Supercontig_1.1	73501	48.458	1.0837	0.115965
Supercontig_1.1	74501	54.947	1.2288	0.29725
Supercontig_1.1	75501	57.234	1.2799	0.356031
Supercontig_1.1	76501	46.714	1.0447	0.0630887
Supercontig_1.1	77501	57.391	1.2834	0.359971
Supercontig_1.1	78501	52.484	1.1737	0.231064
Supercontig_1.1	79501	48.601	1.0869	0.120219
Supercontig_1.1	80501	43.281	0.9679	-0.0470701
Supercontig_1.1	81501	53.052	1.1864	0.246591
Supercontig_1.1	82501	60.134	1.3448	0.427392
Supercontig_1.1	83501	60.558	1.3543	0.437547
Supercontig_1.1	84501	58.481	1.3078	0.387142
Supercontig_1.1	85501	49.174	1.0997	0.13711
Supercontig_1.1	86501	50.159	1.1217	0.165687
Supercontig_1.1	87501	52.011	1.1631	0.217975
Supercontig_1.1	88501	43.681	0.9768	-0.0338649
Supercontig_1.1	89501	44.133	0.987	-0.018878
Supercontig_1.1	90501	52.082	1.1647	0.219958
Supercontig_1.1	91501	46.943	1.0498	0.0701145
Supercontig_1.1	92501	42.331	0.9467	-0.0790208
Supercontig_1.1	93501	49.475	1.1064	0.145873
Supercontig_1.1	94501	55.84	1.2488	0.320542
Supercontig_1.1	95501	50.682	1.1334	0.180657
Supercontig_1.1	96501	57.464	1.2851	0.361881
Supercontig_1.1	97501	56.17	1.2561	0.328951
Supercontig_1.1	98501	54.514	1.2191	0.285816
Supercontig_1.1	99501	54.849	1.2266	0.294665
Supercontig_1.1	100501	53.627	1.1993	0.262193
Supercontig_1.1	101501	46.386	1.0373	0.0528332
Supercontig_1.1	102501	41.988	0.939	-0.0908029
Supercontig_1.1	103501	53.687	1.2006	0.263756
Supercontig_1.1	104501	47.19	1.0553	0.0776532
Supercontig_1.1	105501	47.812	1.0692	0.0965317
Supercontig_1.1	106501	32.978	0.7375	-0.439285
Supercontig_1.1	107501	50.559	1.1307	0.177216
Supercontig_1.1	108501	57.042	1.2756	0.351176
Supercontig_1.1	109501	50.273	1.1243	0.169027
Supercontig_1.1	110501	53.346	1.193	0.254594
Supercontig_1.1	111501	53.906	1.2055	0.269632
Supercontig_1.1	112501	41.19	0.9211	-0.11857
Supercontig_1.1	113501	42.468	0.9497	-0.0744562
Supercontig_1.1	114501	53.428	1.1948	0.256769
Supercontig_1.1	115501	44.02	0.9844	-0.0226834
Supercontig_1.1	116501	48.982	1.0954	0.131458
Supercontig_1.1	117501	43.305	0.9684	-0.046325
Supercontig_1.1	118501	46.334	1.0362	0.0513025
Supercontig_1.1	119501	45.431	1.016	0.0229004
Supercontig_1.1	120501	53.535	1.1972	0.259664
Supercontig_1.1	121501	46.208	1.0334	0.0473988
Supercontig_1.1	122501	41.095	0.919	-0.121863
Supercontig_1.1	123501	41.272	0.923	-0.115597
Supercontig_1.1	124501	40.106	0.8969	-0.156981
Supercontig_1.1	125501	39.299	0.8789	-0.186229
Supercontig_1.1	126501	37.149	0.8308	-0.267427
Supercontig_1.1	127501	43.547	0.9738	-0.0383026
Supercontig_1.1	128501	39.108	0.8746	-0.193305
Supercontig_1.1	129501	31.639	0.7075	-0.499198
Supercontig_1.1	130501	44.033	0.9847	-0.0222438
Supercontig_1.1	131501	39.886	0.892	-0.164884
Supercontig_1.1	132501	46.701	1.0444	0.0626744
Supercontig_1.1	133501	40.402	0.9035	-0.146403
Supercontig_1.1	134501	44.23	0.9891	-0.0158117
Supercontig_1.1	135501	45.792	1.0241	0.0343566
Supercontig_1.1	136501	39.557	0.8846	-0.176903
Supercontig_1.1	137501	42.212	0.944	-0.0831412
Supercontig_1.1	138501	45.163	1.01	0.0143553
Supercontig_1.1	139501	39.195	0.8765	-0.190174
Supercontig_1.1	140501	35.924	0.8034	-0.31581
Supercontig_1.1	141501	42.117	0.9419	-0.0863542
Supercontig_1.1	142501	42.36	0.9473	-0.0781067
Supercontig_1.1	143501	41.515	0.9284	-0.107182
Supercontig_1.1	144501	31.924	0.7139	-0.486206
Supercontig_1.1	145501	47.784	1.0686	0.0957219
Supercontig_1.1	146501	42.92	0.9598	-0.0591943
Supercontig_1.1	147501	34.026	0.7609	-0.394221
Supercontig_1.1	148501	33.487	0.7489	-0.417155
Supercontig_1.1	149501	30.107	0.6733	-0.570679
Supercontig_1.1	150501	36.146	0.8083	-0.307037
Supercontig_1.1	151501	41.021	0.9174	-0.124377
Supercontig_1.1	152501	38.211	0.8545	-0.226848
Supercontig_1.1	153501	40.653	0.9091	-0.137489
Supercontig_1.1	154501	41.181	0.9209	-0.118884
Supercontig_1.1	155501	32.12	0.7183	-0.477342
Supercontig_1.1	156501	38.304	0.8566	-0.223306
Supercontig_1.1	157501	34.96	0.7818	-0.355129
Supercontig_1.1	158501	41.674	0.932	-0.101598
Supercontig_1.1	159501	31.889	0.7131	-0.487824
Supercontig_1.1	160501	26.966	0.603	-0.72977
Supercontig_1.1	161501	39.613	0.8859	-0.174784
Supercontig_1.1	162501	35.191	0.787	-0.345564
Supercontig_1.1	163501	42.805	0.9573	-0.062957
Supercontig_1.1	164501	42.309	0.9462	-0.0797829
Supercontig_1.1	165501	36.519	0.8167	-0.292122
Supercontig_1.1	166501	38.172	0.8536	-0.228368
Supercontig_1.1	167501	37.127	0.8303	-0.268295
Supercontig_1.1	168501	39.832	0.8908	-0.166827
Supercontig_1.1	169501	28.452	0.6363	-0.652221
Supercontig_1.1	170501	36.179	0.8091	-0.30561
Supercontig_1.1	171501	34.059	0.7617	-0.392705
Supercontig_1.1	172501	38.426	0.8593	-0.218766
Supercontig_1.1	173501	30.528	0.6827	-0.550676
Supercontig_1.1	174501	40.574	0.9074	-0.140189
Supercontig_1.1	175501	30.314	0.6779	-0.560856
Supercontig_1.1	176501	42.099	0.9415	-0.086967
Supercontig_1.1	177501	39.717	0.8882	-0.171044
Supercontig_1.1	178501	34.763	0.7774	-0.363271
Supercontig_1.1	179501	35.015	0.783	-0.352916
Supercontig_1.1	180501	32.817	0.7339	-0.446345
Supercontig_1.1	181501	39.504	0.8834	-0.178861
Supercontig_1.1	182501	42.472	0.9498	-0.0743043
Supercontig_1.1	183501	33.887	0.7578	-0.400111
Supercontig_1.1	184501	32.709	0.7315	-0.45107
Supercontig_1.1	185501	30.853	0.69	-0.535332
Supercontig_1.1	186501	35.181	0.7868	-0.345931
Supercontig_1.1	187501	36.954	0.8264	-0.275088
Supercontig_1.1	188501	26.965	0.603	-0.72977
Supercontig_1.1	189501	37.672	0.8425	-0.247251
Supercontig_1.1	190501	30.134	0.6739	-0.569394
Supercontig_1.1	191501	39.229	0.8773	-0.188858
Supercontig_1.1	192501	43.448	0.9716	-0.0415656
Supercontig_1.1	193501	39.484	0.883	-0.179515
Supercontig_1.1	194501	43.837	0.9803	-0.0287048
Supercontig_1.1	195501	29.534	0.6605	-0.59837
Supercontig_1.1	196501	28.2	0.6306	-0.665203
Supercontig_1.1	197501	27.077	0.6055	-0.723801
Supercontig_1.1	198501	35.216	0.7875	-0.344648
Supercontig_1.1	199501	34.155	0.7638	-0.388733
Supercontig_1.1	200501	34.65	0.7749	-0.367918
Supercontig_1.1	201501	30.878	0.6905	-0.534287
Supercontig_1.1	202501	33.665	0.7529	-0.40947
Supercontig_1.1	203501	36.607	0.8186	-0.288769
Supercontig_1.1	204501	29.732	0.6649	-0.588791
Supercontig_1.1	205501	33.405	0.747	-0.42082
Supercontig_1.1	206501	34.405	0.7694	-0.378194
Supercontig_1.1	207501	36.422	0.8145	-0.296013
Supercontig_1.1	208501	32.997	0.7379	-0.438503
Supercontig_1.1	209501	41.62	0.9308	-0.103457
Supercontig_1.1	210501	34.368	0.7686	-0.379695
Supercontig_1.1	211501	33.294	0.7446	-0.425462
Supercontig_1.1	212501	33.561	0.7505	-0.414076
Supercontig_1.1	213501	32.862	0.7349	-0.44438
Supercontig_1.1	214501	35.503	0.794	-0.332789
Supercontig_1.1	215501	34.926	0.7811	-0.356421
Supercontig_1.1	216501	29.998	0.6709	-0.57583
Supercontig_1.1	217501	33.325	0.7453	-0.424107
Supercontig_1.1	218501	36.251	0.8107	-0.30276
Supercontig_1.1	219501	48.155	1.0769	0.106884
Supercontig_1.1	220501	45.452	1.0165	0.0236102
Supercontig_1.1	221501	31.098	0.6955	-0.523878
Supercontig_1.1	222501	34.068	0.7619	-0.392326
Supercontig_1.1	223501	32.277	0.7218	-0.470329
Supercontig_1.1	224501	32.574	0.7285	-0.456999
Supercontig_1.1	225501	30.08	0.6727	-0.571965
Supercontig_1.1	226501	33.157	0.7415	-0.431481
Supercontig_1.1	227501	31.016	0.6936	-0.527824
Supercontig_1.1	228501	36.017	0.8055	-0.312044
Supercontig_1.1	229501	28.525	0.6379	-0.648598
Supercontig_1.1	230501	37.348	0.8352	-0.259806
Supercontig_1.1	231501	27.408	0.6129	-0.706276
Supercontig_1.1	232501	36.483	0.8159	-0.293536
Supercontig_1.1	233501	36.367	0.8133	-0.29814
Supercontig_1.1	234501	32.986	0.7377	-0.438894
Supercontig_1.1	235501	28.907	0.6465	-0.629278
Supercontig_1.1	236501	32.645	0.73	-0.454032
Supercontig_1.1	237501	31.629	0.7073	-0.499606
Supercontig_1.1	238501	33.58	0.751	-0.413115
Supercontig_1.1	239501	33.452	0.7481	-0.418697
Supercontig_1.1	240501	35.748	0.7994	-0.323011
Supercontig_1.1	241501	28.94	0.6472	-0.627716
Supercontig_1.1	242501	30.563	0.6835	-0.548987
Supercontig_1.1	243501	26.029	0.5821	-0.780661
Supercontig_1.1	244501	27.945	0.6249	-0.678303
Supercontig_1.1	245501	33.694	0.7535	-0.408321
Supercontig_1.1	246501	38.253	0.8555	-0.22516
Supercontig_1.1	247501	33.62	0.7519	-0.411387
Supercontig_1.1	248501	41.025	0.9174	-0.124377
Supercontig_1.1	249501	30.301	0.6776	-0.561494
Supercontig_1.1	250501	28.905	0.6464	-0.629501
Supercontig_1.1	251501	35.248	0.7883	-0.343183
Supercontig_1.1	252501	35.164	0.7864	-0.346665
Supercontig_1.1	253501	33.208	0.7426	-0.429343
Supercontig_1.1	254501	34.569	0.7731	-0.371273
Supercontig_1.1	255501	35.381	0.7912	-0.337886
Supercontig_1.1	256501	30.962	0.6924	-0.530322
Supercontig_1.1	257501	34.017	0.7607	-0.3946
Supercontig_1.1	258501	39.825	0.8906	-0.16715
Supercontig_1.1	259501	35.452	0.7928	-0.334971
Supercontig_1.1	260501	31.785	0.7108	-0.492484
Supercontig_1.1	261501	34.079	0.7621	-0.391948
Supercontig_1.1	262501	27.889	0.6237	-0.681076
Supercontig_1.1	263501	33.103	0.7403	-0.433818
Supercontig_1.1	264501	30.728	0.6872	-0.541198
Supercontig_1.1	265501	31.487	0.7041	-0.506148
Supercontig_1.1	266501	34.492	0.7714	-0.374449
Supercontig_1.1	267501	35.549	0.795	-0.330973
Supercontig_1.1	268501	34.556	0.7728	-0.371833
Supercontig_1.1	269501	35.969	0.8044	-0.314015
Supercontig_1.1	270501	32.469	0.7261	-0.46176
Supercontig_1.1	271501	29.913	0.669	-0.579922
Supercontig_1.1	272501	31.108	0.6957	-0.523463
Supercontig_1.1	273501	29.956	0.6699	-0.577982
Supercontig_1.1	274501	35.86	0.8019	-0.318506
Supercontig_1.1	275501	34.63	0.7744	-0.368849
Supercontig_1.1	276501	34.813	0.7785	-0.361231
Supercontig_1.1	277501	30.876	0.6905	-0.534287
Supercontig_1.1	278501	30.866	0.6903	-0.534705
Supercontig_1.1	279501	30.932	0.6917	-0.531782
Supercontig_1.1	280501	26.791	0.5991	-0.739131
Supercontig_1.1	281501	36.71	0.821	-0.284546
Supercontig_1.1	282501	35.607	0.7963	-0.328616
Supercontig_1.1	283501	36.682	0.8203	-0.285776
Supercontig_1.1	284501	32.327	0.7229	-0.468132
Supercontig_1.1	285501	32.238	0.7209	-0.472129
Supercontig_1.1	286501	33.909	0.7583	-0.399159
Supercontig_1.1	287501	31.03	0.6939	-0.5272
Supercontig_1.1	288501	25.222	0.564	-0.826233
Supercontig_1.1	289501	30.73	0.6872	-0.541198
Supercontig_1.1	290501	33.276	0.7442	-0.426238
Supercontig_1.1	291501	28.05	0.6273	-0.672773
Supercontig_1.1	292501	35.141	0.7859	-0.347582
Supercontig_1.1	293501	37.264	0.8333	-0.263092
Supercontig_1.1	294501	34.122	0.7631	-0.390056
Supercontig_1.1	295501	32.539	0.7277	-0.458584
Supercontig_1.1	296501	33.629	0.7521	-0.411004
Supercontig_1.1	297501	24.288	0.5432	-0.880445
Supercontig_1.1	298501	28.92	0.6467	-0.628831
Supercontig_1.1	299501	32.719	0.7317	-0.450676
Supercontig_1.1	300501	31.369	0.7015	-0.511485
Supercontig_1.1	301501	32.362	0.7237	-0.466536
Supercontig_1.1	302501	27.243	0.6092	-0.715012
Supercontig_1.1	303501	25.416	0.5684	-0.815022
Supercontig_1.1	304501	24.813	0.5549	-0.8497
Supercontig_1.1	305501	32.664	0.7305	-0.453044
Supercontig_1.1	306501	31.398	0.7022	-0.510046
Supercontig_1.1	307501	28.669	0.6411	-0.641379
Supercontig_1.1	308501	33.672	0.753	-0.409278
Supercontig_1.1	309501	26.739	0.598	-0.741783
Supercontig_1.1	310501	29.186	0.6527	-0.615508
Supercontig_1.1	311501	31.423	0.7027	-0.509019
Supercontig_1.1	312501	25.609	0.5727	-0.804148
Supercontig_1.1	313501	26.487	0.5923	-0.7556
Supercontig_1.1	314501	36.891	0.825	-0.277534
Supercontig_1.1	315501	31.219	0.6982	-0.518288
Supercontig_1.1	316501	30.151	0.6743	-0.568537
Supercontig_1.1	317501	30.766	0.688	-0.53952
Supercontig_1.1	318501	22.287	0.4984	-1.00462
Supercontig_1.1	319501	20.598	0.4606	-1.11841
Supercontig_1.1	320501	36.703	0.8208	-0.284897
Supercontig_1.1	321501	32.564	0.7282	-0.457593
Supercontig_1.1	322501	34.273	0.7665	-0.383642
Supercontig_1.1	323501	34.113	0.7629	-0.390434
Supercontig_1.1	324501	29.645	0.663	-0.592919
Supercontig_1.1	325501	37.91	0.8478	-0.238204
Supercontig_1.1	326501	27.842	0.6226	-0.683623
Supercontig_1.1	327501	29.922	0.6692	-0.579491
Supercontig_1.1	328501	36.118	0.8077	-0.308109
Supercontig_1.1	329501	33.337	0.7455	-0.42372
Supercontig_1.1	330501	31.063	0.6947	-0.525538
Supercontig_1.1	331501	31.086	0.6952	-0.5245
Supercontig_1.1	332501	28.579	0.6391	-0.645886
Supercontig_1.1	333501	31.13	0.6962	-0.522426
Supercontig_1.1	334501	32.405	0.7247	-0.464544
Supercontig_1.1	335501	32.32	0.7228	-0.468332
Supercontig_1.1	336501	29.167	0.6523	-0.616392
Supercontig_1.1	337501	37.328	0.8348	-0.260497
Supercontig_1.1	338501	25.756	0.576	-0.795859
Supercontig_1.1	339501	27.099	0.606	-0.72261
Supercontig_1.1	340501	30.46	0.6812	-0.55385
Supercontig_1.1	341501	30.065	0.6723	-0.572823
Supercontig_1.1	342501	30.15	0.6743	-0.568537
Supercontig_1.1	343501	28.461	0.6365	-0.651768
Supercontig_1.1	344501	28.016	0.6265	-0.674614
Supercontig_1.1	345501	27.348	0.6116	-0.70934
Supercontig_1.1	346501	27.9	0.6239	-0.680613
Supercontig_1.1	347501	33.508	0.7493	-0.416385
Supercontig_1.1	348501	24.843	0.5556	-0.847881
Supercontig_1.1	349501	34.492	0.7714	-0.374449
Supercontig_1.1	350501	32.81	0.7337	-0.446738
Supercontig_1.1	351501	33.819	0.7563	-0.402969
Supercontig_1.1	352501	29.413	0.6578	-0.604279
Supercontig_1.1	353501	32.222	0.7206	-0.472729
Supercontig_1.1	354501	28.103	0.6285	-0.670015
Supercontig_1.1	355501	30.88	0.6906	-0.534078
Supercontig_1.1	356501	38.029	0.8504	-0.233786
Supercontig_1.1	357501	30.885	0.6907	-0.533869
Supercontig_1.1	358501	35.817	0.801	-0.320126
Supercontig_1.1	359501	31.216	0.6981	-0.518494
Supercontig_1.1	360501	28.049	0.6273	-0.672773
Supercontig_1.1	361501	25.911	0.5795	-0.787119
Supercontig_1.1	362501	32.116	0.7182	-0.477542
Supercontig_1.1	363501	32.761	0.7326	-0.448902
Supercontig_1.1	364501	45.607	1.0199	0.0284277
Supercontig_1.1	365501	31.016	0.6936	-0.527824
Supercontig_1.1	366501	32.671	0.7306	-0.452846
Supercontig_1.1	367501	37.29	0.8339	-0.262054
Supercontig_1.1	368501	28.527	0.638	-0.648372
Supercontig_1.1	369501	27.053	0.605	-0.724993
Supercontig_1.1	370501	26.576	0.5943	-0.750737
Supercontig_1.1	371501	30.569	0.6836	-0.548776
Supercontig_1.1	372501	32.153	0.719	-0.475936
Supercontig_1.1	373501	29.822	0.6669	-0.584458
Supercontig_1.1	374501	25.023	0.5596	-0.837532
Supercontig_1.1	375501	31.511	0.7047	-0.504919
Supercontig_1.1	376501	29.441	0.6584	-0.602964
Supercontig_1.1	377501	37.626	0.8414	-0.249136
Supercontig_1.1	378501	25.205	0.5637	-0.827001
Supercontig_1.1	379501	30.177	0.6749	-0.567254
Supercontig_1.1	380501	37.844	0.8463	-0.240759
Supercontig_1.1	381501	30.248	0.6764	-0.564051
Supercontig_1.1	382501	32.752	0.7324	-0.449296
Supercontig_1.1	383501	29.475	0.6592	-0.601212
Supercontig_1.1	384501	28.452	0.6363	-0.652221
Supercontig_1.1	385501	38.204	0.8544	-0.227016
Supercontig_1.1	386501	27.856	0.6229	-0.682928
Supercontig_1.1	387501	23.682	0.5296	-0.917025
Supercontig_1.1	388501	29.493	0.6596	-0.600337
Supercontig_1.1	389501	28.152	0.6296	-0.667493
Supercontig_1.1	390501	32.54	0.7277	-0.458584
Supercontig_1.1	391501	31.517	0.7048	-0.504714
Supercontig_1.1	392501	34.641	0.7747	-0.36829
Supercontig_1.1	393501	38.653	0.8644	-0.210229
Supercontig_1.1	394501	33.209	0.7427	-0.429149
Supercontig_1.1	395501	28.893	0.6461	-0.630171
Supercontig_1.1	396501	31.751	0.7101	-0.493906
Supercontig_1.1	397501	26.296	0.5881	-0.765867
Supercontig_1.1	398501	28.673	0.6412	-0.641154
Supercontig_1.1	399501	25.292	0.5656	-0.822146
Supercontig_1.1	400501	26.444	0.5914	-0.757794
Supercontig_1.1	401501	28.566	0.6388	-0.646564
Supercontig_1.1	402501	23.84	0.5331	-0.907522
Supercontig_1.1	403501	31.65	0.7078	-0.498586
Supercontig_1.1	404501	29.54	0.6606	-0.598151
Supercontig_1.1	405501	24.372	0.545	-0.875672
Supercontig_1.1	406501	29.522	0.6602	-0.599025
Supercontig_1.1	407501	29.898	0.6686	-0.580785
Supercontig_1.1	408501	27.874	0.6234	-0.68177
Supercontig_1.1	409501	28.55	0.6385	-0.647241
Supercontig_1.1	410501	25.815	0.5773	-0.792607
Supercontig_1.1	411501	30.71	0.6868	-0.542038
Supercontig_1.1	412501	25.865	0.5784	-0.789861
Supercontig_1.1	413501	28.783	0.6437	-0.63554
Supercontig_1.1	414501	27.421	0.6132	-0.70557
Supercontig_1.1	415501	27.632	0.6179	-0.694555
Supercontig_1.1	416501	28.2	0.6306	-0.665203
Supercontig_1.1	417501	22.75	0.5088	-0.974829
Supercontig_1.1	418501	17.4	0.3891	-1.36179
Supercontig_1.1	419501	27.387	0.6125	-0.707218
Supercontig_1.1	420501	30.285	0.6773	-0.562133
Supercontig_1.1	421501	23.504	0.5256	-0.927963
Supercontig_1.1	422501	28.243	0.6316	-0.662917
Supercontig_1.1	423501	29.772	0.6658	-0.586839
Supercontig_1.1	424501	29.011	0.6488	-0.624154
Supercontig_1.1	425501	30.654	0.6855	-0.544771
Supercontig_1.1	426501	28.239	0.6315	-0.663145
Supercontig_1.1	427501	27.736	0.6203	-0.688962
Supercontig_1.1	428501	29.516	0.6601	-0.599243
Supercontig_1.1	429501	31.301	0.7	-0.514573
Supercontig_1.1	430501	29.03	0.6492	-0.623265
Supercontig_1.1	431501	31.37	0.7015	-0.511485
Supercontig_1.1	432501	31.639	0.7075	-0.499198
Supercontig_1.1	433501	34.785	0.7779	-0.362343
Supercontig_1.1	434501	37.305	0.8343	-0.261362
Supercontig_1.1	435501	24.634	0.5509	-0.860138
Supercontig_1.1	436501	26.022	0.5819	-0.781157
Supercontig_1.1	437501	26.13	0.5844	-0.774972
Supercontig_1.1	438501	27.438	0.6136	-0.70463
Supercontig_1.1	439501	28.829	0.6447	-0.6333
Supercontig_1.1	440501	29.513	0.66	-0.599462
Supercontig_1.1	441501	25.035	0.5599	-0.836759
Supercontig_1.1	442501	30.316	0.678	-0.560643
Supercontig_1.1	443501	29.666	0.6634	-0.592049
Supercontig_1.1	444501	23.923	0.535	-0.902389
Supercontig_1.1	445501	23.565	0.527	-0.924125
Supercontig_1.1	446501	24.601	0.5502	-0.861972
Supercontig_1.1	447501	33.244	0.7434	-0.427789
Supercontig_1.1	448501	23.002	0.5144	-0.959037
Supercontig_1.1	449501	25.164	0.5627	-0.829562
Supercontig_1.1	450501	32.768	0.7328	-0.448509
Supercontig_1.1	451501	28.663	0.641	-0.641604
Supercontig_1.1	452501	27.175	0.6077	-0.718569
Supercontig_1.1	453501	30.577	0.6838	-0.548354
Supercontig_1.1	454501	29.586	0.6616	-0.595969
Supercontig_1.1	455501	35.334	0.7902	-0.33971
Supercontig_1.1	456501	25.054	0.5603	-0.835729
Supercontig_1.1	457501	32.99	0.7378	-0.438698
Supercontig_1.1	458501	31.205	0.6978	-0.519114
Supercontig_1.1	459501	26.962	0.603	-0.72977
Supercontig_1.1	460501	23.811	0.5325	-0.909147
Supercontig_1.1	461501	31.459	0.7035	-0.507378
Supercontig_1.1	462501	34.645	0.7748	-0.368104
Supercontig_1.1	463501	31.651	0.7078	-0.498586
Supercontig_1.1	464501	36.35	0.8129	-0.29885
Supercontig_1.1	465501	30.681	0.6861	-0.543509
Supercontig_1.1	466501	31.591	0.7065	-0.501239
Supercontig_1.1	467501	36.835	0.8237	-0.279809
Supercontig_1.1	468501	31.401	0.7022	-0.510046
Supercontig_1.1	469501	26.177	0.5854	-0.772505
Supercontig_1.1	470501	31.314	0.7003	-0.513955
Supercontig_1.1	471501	26.687	0.5968	-0.744681
Supercontig_1.1	472501	29.793	0.6663	-0.585756
Supercontig_1.1	473501	28.751	0.643	-0.637109
Supercontig_1.1	474501	24.735	0.5532	-0.854127
Supercontig_1.1	475501	29.619	0.6624	-0.594225
Supercontig_1.1	476501	28.205	0.6308	-0.664745
Supercontig_1.1	477501	31.431	0.7029	-0.508609
Supercontig_1.1	478501	24.464	0.5471	-0.870124
Supercontig_1.1	479501	28.686	0.6415	-0.640479
Supercontig_1.1	480501	28.786	0.6437	-0.63554
Supercontig_1.1	481501	29.094	0.6506	-0.620157
Supercontig_1.1	482501	29.002	0.6486	-0.624599
Supercontig_1.1	483501	28.751	0.643	-0.637109
Supercontig_1.1	484501	25.696	0.5746	-0.79937
Supercontig_1.1	485501	27.476	0.6145	-0.702515
Supercontig_1.1	486501	25.237	0.5644	-0.82521
Supercontig_1.1	487501	32.851	0.7347	-0.444773
Supercontig_1.1	488501	26.637	0.5957	-0.747342
Supercontig_1.1	489501	24.38	0.5452	-0.875143
Supercontig_1.1	490501	26.586	0.5945	-0.750251
Supercontig_1.1	491501	27.782	0.6213	-0.686638
Supercontig_1.1	492501	28.946	0.6473	-0.627494
Supercontig_1.1	493501	30.332	0.6783	-0.560005
Supercontig_1.1	494501	31.099	0.6955	-0.523878
Supercontig_1.1	495501	29.738	0.665	-0.588574
Supercontig_1.1	496501	17.831	0.3988	-1.32626
Supercontig_1.1	497501	27.756	0.6207	-0.688032
Supercontig_1.1	498501	31.963	0.7148	-0.484388
Supercontig_1.1	499501	29.956	0.6699	-0.577982
Supercontig_1.1	500501	27.958	0.6252	-0.67761
Supercontig_1.1	501501	25.929	0.5799	-0.786124
Supercontig_1.1	502501	32.297	0.7223	-0.46933
Supercontig_1.1	503501	31.334	0.7007	-0.513131
Supercontig_1.1	504501	30.182	0.675	-0.567041
Supercontig_1.1	505501	29.422	0.658	-0.603841
Supercontig_1.1	506501	27.083	0.6057	-0.723325
Supercontig_1.1	507501	30.876	0.6905	-0.534287
Supercontig_1.1	508501	28.55	0.6385	-0.647241
Supercontig_1.1	509501	32.06	0.717	-0.479955
Supercontig_1.1	510501	32.109	0.7181	-0.477743
Supercontig_1.1	511501	30.485	0.6817	-0.552791
Supercontig_1.1	512501	27.458	0.614	-0.703689
Supercontig_1.1	513501	30.824	0.6893	-0.536796
Supercontig_1.1	514501	23.649	0.5289	-0.918933
Supercontig_1.1	515501	26.292	0.588	-0.766112
Supercontig_1.1	516501	31.535	0.7052	-0.503896
Supercontig_1.1	517501	36.887	0.8249	-0.277709
Supercontig_1.1	518501	27.399	0.6127	-0.706747
Supercontig_1.1	519501	30.114	0.6734	-0.570464
Supercontig_1.1	520501	24.517	0.5483	-0.866963
Supercontig_1.1	521501	28.526	0.6379	-0.648598
Supercontig_1.1	522501	38.741	0.8664	-0.206895
Supercontig_1.1	523501	32.81	0.7337	-0.446738
Supercontig_1.1	524501	38.587	0.8629	-0.212735
Supercontig_1.1	525501	40.481	0.9053	-0.143532
Supercontig_1.1	526501	36.09	0.8071	-0.309181
Supercontig_1.1	527501	42.134	0.9423	-0.0857417
Supercontig_1.1	528501	20.986	0.4693	-1.09142
Supercontig_1.1	529501	29.303	0.6553	-0.609773
Supercontig_1.1	530501	33.465	0.7484	-0.418119
Supercontig_1.1	531501	28.625	0.6401	-0.643631
Supercontig_1.1	532501	34.731	0.7767	-0.364571
Supercontig_1.1	533501	27.045	0.6048	-0.72547
Supercontig_1.1	534501	29.081	0.6503	-0.620823
Supercontig_1.1	535501	28.213	0.6309	-0.664517
Supercontig_1.1	536501	35.5	0.7939	-0.332971
Supercontig_1.1	537501	28.815	0.6444	-0.633972
Supercontig_1.1	538501	33.563	0.7506	-0.413884
Supercontig_1.1	539501	26.327	0.5888	-0.76415
Supercontig_1.1	540501	30.846	0.6898	-0.53575
Supercontig_1.1	541501	25.131	0.562	-0.831358
Supercontig_1.1	542501	28.544	0.6383	-0.647693
Supercontig_1.1	543501	29.075	0.6502	-0.621045
Supercontig_1.1	544501	25.331	0.5665	-0.819852
Supercontig_1.1	545501	31.538	0.7053	-0.503691
Supercontig_1.1	546501	28.48	0.6369	-0.650861
Supercontig_1.1	547501	28.27	0.6322	-0.661547
Supercontig_1.1	548501	25.945	0.5802	-0.785378
Supercontig_1.1	549501	23.524	0.5261	-0.926591
Supercontig_1.1	550501	31.002	0.6933	-0.528448
Supercontig_1.1	551501	33.777	0.7554	-0.404687
Supercontig_1.1	552501	26.632	0.5956	-0.747584
Supercontig_1.1	553501	32.674	0.7307	-0.452649
Supercontig_1.1	554501	34.721	0.7765	-0.364942
Supercontig_1.1	555501	30.316	0.678	-0.560643
Supercontig_1.1	556501	30.766	0.688	-0.53952
Supercontig_1.1	557501	36.64	0.8194	-0.28736
Supercontig_1.1	558501	28.911	0.6465	-0.629278
Supercontig_1.1	559501	33.53	0.7498	-0.415422
Supercontig_1.1	560501	33.246	0.7435	-0.427595
Supercontig_1.1	561501	29.204	0.6531	-0.614624
Supercontig_1.1	562501	29.171	0.6524	-0.616171
Supercontig_1.1	563501	23.728	0.5306	-0.914303
Supercontig_1.1	564501	30.503	0.6821	-0.551945
Supercontig_1.1	565501	28.714	0.6421	-0.63913
Supercontig_1.1	566501	34.613	0.7741	-0.369408
Supercontig_1.1	567501	29.577	0.6614	-0.596405
Supercontig_1.1	568501	30.647	0.6854	-0.544982
Supercontig_1.1	569501	34.601	0.7738	-0.369967
Supercontig_1.1	570501	29.193	0.6528	-0.615287
Supercontig_1.1	571501	27.216	0.6086	-0.716434
Supercontig_1.1	572501	28.325	0.6334	-0.658811
Supercontig_1.1	573501	25.555	0.5715	-0.807175
Supercontig_1.1	574501	28.317	0.6333	-0.659039
Supercontig_1.1	575501	29.69	0.664	-0.590745
Supercontig_1.1	576501	33.617	0.7518	-0.411579
Supercontig_1.1	577501	31.003	0.6933	-0.528448
Supercontig_1.1	578501	35.105	0.7851	-0.349052
Supercontig_1.1	579501	31.418	0.7026	-0.509225
Supercontig_1.1	580501	36.527	0.8169	-0.291769
Supercontig_1.1	581501	37.3	0.8341	-0.261708
Supercontig_1.1	582501	36.067	0.8066	-0.310075
Supercontig_1.1	583501	35.371	0.791	-0.33825
Supercontig_1.1	584501	29.041	0.6494	-0.622821
Supercontig_1.1	585501	28.813	0.6444	-0.633972
Supercontig_1.1	586501	30.035	0.6717	-0.574111
Supercontig_1.1	587501	35.585	0.7958	-0.329522
Supercontig_1.1	588501	29.883	0.6683	-0.581432
Supercontig_1.1	589501	31.909	0.7136	-0.486812
Supercontig_1.1	590501	34.917	0.7809	-0.35679
Supercontig_1.1	591501	30.563	0.6835	-0.548987
Supercontig_1.1	592501	30.009	0.6711	-0.5754
Supercontig_1.1	593501	34.475	0.771	-0.375197
Supercontig_1.1	594501	25.197	0.5635	-0.827512
Supercontig_1.1	595501	31.268	0.6993	-0.516017
Supercontig_1.1	596501	27.435	0.6135	-0.704865
Supercontig_1.1	597501	31.751	0.7101	-0.493906
Supercontig_1.1	598501	29.228	0.6536	-0.61352
Supercontig_1.1	599501	28.193	0.6305	-0.665432
Supercontig_1.1	600501	30.247	0.6764	-0.564051
Supercontig_1.1	601501	30.106	0.6733	-0.570679
Supercontig_1.1	602501	26.376	0.5899	-0.761458
Supercontig_1.1	603501	29.842	0.6674	-0.583376
Supercontig_1.1	604501	27.623	0.6177	-0.695022
Supercontig_1.1	605501	31.578	0.7062	-0.501851
Supercontig_1.1	606501	28.912	0.6466	-0.629055
Supercontig_1.1	607501	27.922	0.6244	-0.679458
Supercontig_1.1	608501	26.885	0.6012	-0.734083
Supercontig_1.1	609501	25.528	0.5709	-0.80869
Supercontig_1.1	610501	32.775	0.733	-0.448115
Supercontig_1.1	611501	29.891	0.6685	-0.581001
Supercontig_1.1	612501	30.312	0.6779	-0.560856
Supercontig_1.1	613501	33.023	0.7385	-0.43733
Supercontig_1.1	614501	39.96	0.8936	-0.162299
Supercontig_1.1	615501	31.052	0.6944	-0.526161
Supercontig_1.1	616501	33.89	0.7579	-0.399921
Supercontig_1.1	617501	33.861	0.7572	-0.401254
Supercontig_1.1	618501	28.175	0.6301	-0.666347
Supercontig_1.1	619501	33.592	0.7512	-0.412731
Supercontig_1.1	620501	35.657	0.7974	-0.326624
Supercontig_1.1	621501	31.366	0.7014	-0.511691
Supercontig_1.1	622501	28.508	0.6375	-0.649503
Supercontig_1.1	623501	29.127	0.6514	-0.618384
Supercontig_1.1	624501	25.257	0.5648	-0.824188
Supercontig_1.1	625501	28.443	0.6361	-0.652675
Supercontig_1.1	626501	28.223	0.6312	-0.663831
Supercontig_1.1	627501	31.718	0.7093	-0.495532
Supercontig_1.1	628501	33.719	0.7541	-0.407172
Supercontig_1.1	629501	37.436	0.8372	-0.256356
Supercontig_1.1	630501	37.721	0.8436	-0.245369
Supercontig_1.1	631501	33.327	0.7453	-0.424107
Supercontig_1.1	632501	36.271	0.8111	-0.302048
Supercontig_1.1	633501	30.342	0.6785	-0.559579
Supercontig_1.1	634501	24.249	0.5423	-0.882837
Supercontig_1.1	635501	35.077	0.7844	-0.350339
Supercontig_1.1	636501	32.116	0.7182	-0.477542
Supercontig_1.1	637501	27.346	0.6115	-0.709576
Supercontig_1.1	638501	36.49	0.816	-0.293359
Supercontig_1.1	639501	31.103	0.6956	-0.52367
Supercontig_1.1	640501	36.512	0.8165	-0.292475
Supercontig_1.1	641501	29.276	0.6547	-0.611094
Supercontig_1.1	642501	28.545	0.6384	-0.647467
Supercontig_1.1	643501	26.662	0.5962	-0.746132
Supercontig_1.1	644501	30.567	0.6836	-0.548776
Supercontig_1.1	645501	25.433	0.5688	-0.814007
Supercontig_1.1	646501	27.761	0.6208	-0.6878
Supercontig_1.1	647501	29.789	0.6662	-0.585973
Supercontig_1.1	648501	31.778	0.7107	-0.492687
Supercontig_1.1	649501	30.956	0.6923	-0.530531
Supercontig_1.1	650501	24.715	0.5527	-0.855431
Supercontig_1.1	651501	32.209	0.7203	-0.47333
Supercontig_1.1	652501	34.266	0.7663	-0.384019
Supercontig_1.1	653501	30.493	0.6819	-0.552368
Supercontig_1.1	654501	33.297	0.7446	-0.425462
Supercontig_1.1	655501	31.01	0.6935	-0.528032
Supercontig_1.1	656501	28.045	0.6272	-0.673003
Supercontig_1.1	657501	37.358	0.8354	-0.259461
Supercontig_1.1	658501	31.872	0.7128	-0.488431
Supercontig_1.1	659501	34.962	0.7819	-0.354944
Supercontig_1.1	660501	31.27	0.6993	-0.516017
Supercontig_1.1	661501	31.988	0.7154	-0.483178
Supercontig_1.1	662501	38.946	0.871	-0.199255
Supercontig_1.1	663501	26.783	0.599	-0.739372
Supercontig_1.1	664501	34.11	0.7628	-0.390623
Supercontig_1.1	665501	24.453	0.5468	-0.870915
Supercontig_1.1	666501	29.229	0.6537	-0.613299
Supercontig_1.1	667501	31.46	0.7035	-0.507378
Supercontig_1.1	668501	30.869	0.6903	-0.534705
Supercontig_1.1	669501	31.378	0.7017	-0.511074
Supercontig_1.1	670501	31.017	0.6936	-0.527824
Supercontig_1.1	671501	25.992	0.5813	-0.782645
Supercontig_1.1	672501	31.012	0.6935	-0.528032
Supercontig_1.1	673501	22.744	0.5086	-0.975397
Supercontig_1.1	674501	25.681	0.5743	-0.800124
Supercontig_1.1	675501	26.695	0.597	-0.744197
Supercontig_1.1	676501	29.012	0.6488	-0.624154
Supercontig_1.1	677501	22.408	0.5011	-0.99683
Supercontig_1.1	678501	30.677	0.686	-0.54372
Supercontig_1.1	679501	25.55	0.5714	-0.807427
Supercontig_1.1	680501	32.544	0.7278	-0.458386
Supercontig_1.1	681501	32.664	0.7305	-0.453044
Supercontig_1.1	682501	27.526	0.6156	-0.699935
Supercontig_1.1	683501	21.775	0.487	-1.03801
Supercontig_1.1	684501	33.366	0.7462	-0.422366
Supercontig_1.1	685501	30.626	0.6849	-0.546035
Supercontig_1.1	686501	32.067	0.7171	-0.479754
Supercontig_1.1	687501	40.113	0.8971	-0.156659
Supercontig_1.1	688501	32.411	0.7248	-0.464345
Supercontig_1.1	689501	33.275	0.7441	-0.426432
Supercontig_1.1	690501	31.266	0.6992	-0.516223
Supercontig_1.1	691501	32.359	0.7237	-0.466536
Supercontig_1.1	692501	30.008	0.6711	-0.5754
Supercontig_1.1	693501	24.975	0.5585	-0.840371
Supercontig_1.1	694501	32.171	0.7194	-0.475134
Supercontig_1.1	695501	33.78	0.7554	-0.404687
Supercontig_1.1	696501	34.56	0.7729	-0.371646
Supercontig_1.1	697501	31.842	0.7121	-0.489848
Supercontig_1.1	698501	30.948	0.6921	-0.530948
Supercontig_1.1	699501	34.133	0.7633	-0.389678
Supercontig_1.1	700501	27.159	0.6074	-0.719281
Supercontig_1.1	701501	34.87	0.7798	-0.358824
Supercontig_1.1	702501	29.077	0.6503	-0.620823
Supercontig_1.1	703501	34.882	0.7801	-0.358269
Supercontig_1.1	704501	22.773	0.5093	-0.973412
Supercontig_1.1	705501	27.244	0.6093	-0.714775
Supercontig_1.1	706501	32.361	0.7237	-0.466536
Supercontig_1.1	707501	34.659	0.7751	-0.367546
Supercontig_1.1	708501	25.482	0.5699	-0.811219
Supercontig_1.1	709501	25.648	0.5736	-0.801883
Supercontig_1.1	710501	24.981	0.5587	-0.839854
Supercontig_1.1	711501	34.53	0.7722	-0.372954
Supercontig_1.1	712501	27.205	0.6084	-0.716908
Supercontig_1.1	713501	25.36	0.5671	-0.818325
Supercontig_1.1	714501	29.142	0.6517	-0.61772
Supercontig_1.1	715501	31.051	0.6944	-0.526161
Supercontig_1.1	716501	24.553	0.5491	-0.864859
Supercontig_1.1	717501	32.092	0.7177	-0.478547
Supercontig_1.1	718501	32.498	0.7268	-0.46037
Supercontig_1.1	719501	28.547	0.6384	-0.647467
Supercontig_1.1	720501	25.087	0.561	-0.833927
Supercontig_1.1	721501	28.214	0.631	-0.664288
Supercontig_1.1	722501	28.678	0.6413	-0.640929
Supercontig_1.1	723501	27.52	0.6154	-0.700404
Supercontig_1.1	724501	27.629	0.6179	-0.694555
Supercontig_1.1	725501	29.239	0.6539	-0.612858
Supercontig_1.1	726501	34.404	0.7694	-0.378194
Supercontig_1.1	727501	31.179	0.6973	-0.520149
Supercontig_1.1	728501	26.869	0.6009	-0.734803
Supercontig_1.1	729501	28.726	0.6424	-0.638456
Supercontig_1.1	730501	30.541	0.683	-0.550043
Supercontig_1.1	731501	29.119	0.6512	-0.618827
Supercontig_1.1	732501	27.002	0.6039	-0.727618
Supercontig_1.1	733501	31.432	0.7029	-0.508609
Supercontig_1.1	734501	29.623	0.6625	-0.594008
Supercontig_1.1	735501	30.802	0.6888	-0.537843
Supercontig_1.1	736501	31.477	0.7039	-0.506558
Supercontig_1.1	737501	39.412	0.8814	-0.182131
Supercontig_1.1	738501	40.632	0.9087	-0.138124
Supercontig_1.1	739501	38.982	0.8718	-0.197931
Supercontig_1.1	740501	30.294	0.6775	-0.561707
Supercontig_1.1	741501	33.537	0.75	-0.415037
Supercontig_1.1	742501	27.51	0.6152	-0.700873
Supercontig_1.1	743501	29.354	0.6564	-0.607353
Supercontig_1.1	744501	20.909	0.4676	-1.09665
Supercontig_1.1	745501	31.666	0.7082	-0.497771
Supercontig_1.1	746501	26.849	0.6004	-0.736004
Supercontig_1.1	747501	27.645	0.6182	-0.693854
Supercontig_1.1	748501	24.064	0.5381	-0.894054
Supercontig_1.1	749501	26.145	0.5847	-0.774232
Supercontig_1.1	750501	28.316	0.6332	-0.659267
Supercontig_1.1	751501	33.255	0.7437	-0.427207
Supercontig_1.1	752501	29.723	0.6647	-0.589225
Supercontig_1.1	753501	23.754	0.5312	-0.912673
Supercontig_1.1	754501	37.256	0.8332	-0.263265
Supercontig_1.1	755501	30.534	0.6828	-0.550465
Supercontig_1.1	756501	29.333	0.656	-0.608232
Supercontig_1.1	757501	29.095	0.6507	-0.619936
Supercontig_1.1	758501	25.423	0.5685	-0.814768
Supercontig_1.1	759501	27.422	0.6132	-0.70557
Supercontig_1.1	760501	29.017	0.6489	-0.623932
Supercontig_1.1	761501	31.797	0.7111	-0.491876
Supercontig_1.1	762501	27.97	0.6255	-0.676918
Supercontig_1.1	763501	29.789	0.6662	-0.585973
Supercontig_1.1	764501	29.959	0.67	-0.577767
Supercontig_1.1	765501	32.487	0.7265	-0.460965
Supercontig_1.1	766501	29.303	0.6553	-0.609773
Supercontig_1.1	767501	27.197	0.6082	-0.717382
Supercontig_1.1	768501	28.965	0.6477	-0.626602
Supercontig_1.1	769501	27.894	0.6238	-0.680845
Supercontig_1.1	770501	29.515	0.66	-0.599462
Supercontig_1.1	771501	24.265	0.5426	-0.882039
Supercontig_1.1	772501	31.34	0.7009	-0.512719
Supercontig_1.1	773501	29.933	0.6694	-0.57906
Supercontig_1.1	774501	30.662	0.6857	-0.544351
Supercontig_1.1	775501	35.048	0.7838	-0.351443
Supercontig_1.1	776501	26.093	0.5835	-0.777195
Supercontig_1.1	777501	31.772	0.7105	-0.493093
Supercontig_1.1	778501	29.032	0.6492	-0.623265
Supercontig_1.1	779501	27.275	0.61	-0.713119
Supercontig_1.1	780501	31.387	0.7019	-0.510663
Supercontig_1.1	781501	28.727	0.6424	-0.638456
Supercontig_1.1	782501	28.514	0.6377	-0.64905
Supercontig_1.1	783501	36.087	0.807	-0.309359
Supercontig_1.1	784501	26.563	0.594	-0.751465
Supercontig_1.1	785501	35.697	0.7983	-0.324997
Supercontig_1.1	786501	26.953	0.6028	-0.730249
Supercontig_1.1	787501	30.292	0.6774	-0.56192
Supercontig_1.1	788501	28.801	0.6441	-0.634643
Supercontig_1.1	789501	28.12	0.6289	-0.669097
Supercontig_1.1	790501	34.307	0.7672	-0.382325
Supercontig_1.1	791501	34.577	0.7733	-0.3709
Supercontig_1.1	792501	29.273	0.6546	-0.611314
Supercontig_1.1	793501	30.633	0.6851	-0.545614
Supercontig_1.1	794501	24.665	0.5516	-0.858306
Supercontig_1.1	795501	26.097	0.5836	-0.776948
Supercontig_1.1	796501	32.531	0.7275	-0.458981
Supercontig_1.1	797501	29.327	0.6558	-0.608672
Supercontig_1.1	798501	28.032	0.6269	-0.673693
Supercontig_1.1	799501	26.88	0.6011	-0.734323
Supercontig_1.1	800501	34.105	0.7627	-0.390812
Supercontig_1.1	801501	32.187	0.7198	-0.474332
Supercontig_1.1	802501	29.019	0.649	-0.62371
Supercontig_1.1	803501	31.496	0.7044	-0.505533
Supercontig_1.1	804501	32.98	0.7375	-0.439285
Supercontig_1.1	805501	30.362	0.679	-0.558517
Supercontig_1.1	806501	27.148	0.6071	-0.719994
Supercontig_1.1	807501	25.304	0.5659	-0.821381
Supercontig_1.1	808501	32.125	0.7184	-0.477141
Supercontig_1.1	809501	32.245	0.7211	-0.471729
Supercontig_1.1	810501	27.264	0.6097	-0.713829
Supercontig_1.1	811501	26.744	0.5981	-0.741541
Supercontig_1.1	812501	33.012	0.7383	-0.437721
Supercontig_1.1	813501	33.28	0.7442	-0.426238
Supercontig_1.1	814501	30.761	0.6879	-0.539729
Supercontig_1.1	815501	30.402	0.6799	-0.556606
Supercontig_1.1	816501	36.533	0.817	-0.291592
Supercontig_1.1	817501	26.138	0.5845	-0.774725
Supercontig_1.1	818501	33.293	0.7445	-0.425656
Supercontig_1.1	819501	26.515	0.593	-0.753896
Supercontig_1.1	820501	27.684	0.6191	-0.691756
Supercontig_1.1	821501	28.764	0.6433	-0.636436
Supercontig_1.1	822501	38.759	0.8668	-0.206229
Supercontig_1.1	823501	30.778	0.6883	-0.538891
Supercontig_1.1	824501	31.894	0.7133	-0.487419
Supercontig_1.1	825501	29.697	0.6641	-0.590528
Supercontig_1.1	826501	28.617	0.64	-0.643856
Supercontig_1.1	827501	32.356	0.7236	-0.466736
Supercontig_1.1	828501	18.185	0.4067	-1.29796
Supercontig_1.1	829501	26.232	0.5866	-0.769551
Supercontig_1.1	830501	29.575	0.6614	-0.596405
Supercontig_1.1	831501	25.874	0.5786	-0.789362
Supercontig_1.1	832501	27.277	0.61	-0.713119
Supercontig_1.1	833501	27.291	0.6103	-0.71241
Supercontig_1.1	834501	25.903	0.5793	-0.787617
Supercontig_1.1	835501	28.425	0.6357	-0.653582
Supercontig_1.1	836501	27.855	0.6229	-0.682928
Supercontig_1.1	837501	27.093	0.6059	-0.722848
Supercontig_1.1	838501	32.28	0.7219	-0.470129
Supercontig_1.1	839501	35.169	0.7865	-0.346481
Supercontig_1.1	840501	26.218	0.5863	-0.770289
Supercontig_1.1	841501	29.37	0.6568	-0.606474
Supercontig_1.1	842501	24.058	0.538	-0.894322
Supercontig_1.1	843501	35.24	0.7881	-0.343549
Supercontig_1.1	844501	24.784	0.5542	-0.851521
Supercontig_1.1	845501	19.937	0.4459	-1.16521
Supercontig_1.1	846501	35.039	0.7836	-0.351811
Supercontig_1.1	847501	33.724	0.7542	-0.406981
Supercontig_1.1	848501	28.361	0.6342	-0.65699
Supercontig_1.1	849501	24.865	0.5561	-0.846584
Supercontig_1.1	850501	31.773	0.7105	-0.493093
Supercontig_1.1	851501	22.572	0.5048	-0.986216
Supercontig_1.1	852501	26.318	0.5886	-0.764641
Supercontig_1.1	853501	36.204	0.8096	-0.304719
Supercontig_1.1	854501	32.92	0.7362	-0.44183
Supercontig_1.1	855501	31.26	0.6991	-0.516429
Supercontig_1.1	856501	34.202	0.7649	-0.386657
Supercontig_1.1	857501	32.782	0.7331	-0.447918
Supercontig_1.1	858501	26.952	0.6027	-0.730488
Supercontig_1.1	859501	28.543	0.6383	-0.647693
Supercontig_1.1	860501	28.994	0.6484	-0.625044
Supercontig_1.1	861501	35.999	0.8051	-0.31276
Supercontig_1.1	862501	34.334	0.7678	-0.381198
Supercontig_1.1	863501	26.853	0.6005	-0.735764
Supercontig_1.1	864501	28.695	0.6417	-0.640029
Supercontig_1.1	865501	30.579	0.6838	-0.548354
Supercontig_1.1	866501	23.454	0.5245	-0.930985
Supercontig_1.1	867501	31.786	0.7108	-0.492484
Supercontig_1.1	868501	25.926	0.5798	-0.786373
Supercontig_1.1	869501	25.387	0.5677	-0.816799
Supercontig_1.1	870501	27.832	0.6224	-0.684086
Supercontig_1.1	871501	26.704	0.5972	-0.743714
Supercontig_1.1	872501	32.886	0.7354	-0.443399
Supercontig_1.1	873501	24.486	0.5476	-0.868806
Supercontig_1.1	874501	34.1	0.7626	-0.391002
Supercontig_1.1	875501	31.213	0.698	-0.518701
Supercontig_1.1	876501	32.516	0.7272	-0.459576
Supercontig_1.1	877501	34.862	0.7796	-0.359194
Supercontig_1.1	878501	28.761	0.6432	-0.636661
Supercontig_1.1	879501	27.826	0.6223	-0.684318
Supercontig_1.1	880501	32.93	0.7364	-0.441438
Supercontig_1.1	881501	24.613	0.5504	-0.861448
Supercontig_1.1	882501	29.498	0.6597	-0.600118
Supercontig_1.1	883501	23.538	0.5264	-0.925769
Supercontig_1.1	884501	25.188	0.5633	-0.828025
Supercontig_1.1	885501	32.641	0.73	-0.454032
Supercontig_1.1	886501	26.884	0.6012	-0.734083
Supercontig_1.1	887501	26.083	0.5833	-0.77769
Supercontig_1.1	888501	29.537	0.6605	-0.59837
Supercontig_1.1	889501	28.293	0.6327	-0.660406
Supercontig_1.1	890501	32.65	0.7302	-0.453636
Supercontig_1.1	891501	23.813	0.5325	-0.909147
Supercontig_1.1	892501	29.842	0.6674	-0.583376
Supercontig_1.1	893501	31.525	0.705	-0.504305
Supercontig_1.1	894501	30.404	0.6799	-0.556606
Supercontig_1.1	895501	32.696	0.7312	-0.451662
Supercontig_1.1	896501	31.734	0.7097	-0.494719
Supercontig_1.1	897501	31.933	0.7141	-0.485802
Supercontig_1.1	898501	34.827	0.7788	-0.360675
Supercontig_1.1	899501	33.647	0.7525	-0.410237
Supercontig_1.1	900501	32.326	0.7229	-0.468132
Supercontig_1.1	901501	26.601	0.5949	-0.749281
Supercontig_1.1	902501	21.023	0.4701	-1.08896
Supercontig_1.1	903501	24.11	0.5392	-0.891108
Supercontig_1.1	904501	34.519	0.772	-0.373327
Supercontig_1.1	905501	29.957	0.6699	-0.577982
Supercontig_1.1	906501	27.088	0.6058	-0.723087
Supercontig_1.1	907501	29.7	0.6642	-0.59031
Supercontig_1.1	908501	33.195	0.7423	-0.429926
Supercontig_1.1	909501	34.27	0.7664	-0.383831
Supercontig_1.1	910501	25.899	0.5792	-0.787866
Supercontig_1.1	911501	34.912	0.7807	-0.35716
Supercontig_1.1	912501	29.621	0.6624	-0.594225
Supercontig_1.1	913501	23.1	0.5166	-0.95288
Supercontig_1.1	914501	34.885	0.7801	-0.358269
Supercontig_1.1	915501	29.63	0.6626	-0.59379
Supercontig_1.1	916501	30.728	0.6872	-0.541198
Supercontig_1.1	917501	27.556	0.6162	-0.698529
Supercontig_1.1	918501	30.52	0.6825	-0.551099
Supercontig_1.1	919501	28.572	0.639	-0.646112
Supercontig_1.1	920501	29.957	0.6699	-0.577982
Supercontig_1.1	921501	28.15	0.6295	-0.667722
Supercontig_1.1	922501	27.675	0.6189	-0.692222
Supercontig_1.1	923501	33.319	0.7451	-0.424494
Supercontig_1.1	924501	24.487	0.5476	-0.868806
Supercontig_1.1	925501	32.338	0.7232	-0.467533
Supercontig_1.1	926501	30.082	0.6727	-0.571965
Supercontig_1.1	927501	30.832	0.6895	-0.536378
Supercontig_1.1	928501	27.586	0.6169	-0.696891
Supercontig_1.1	929501	30.84	0.6897	-0.535959
Supercontig_1.1	930501	35.02	0.7832	-0.352547
Supercontig_1.1	931501	28.74	0.6427	-0.637783
Supercontig_1.1	932501	26.764	0.5985	-0.740577
Supercontig_1.1	933501	26.993	0.6036	-0.728335
Supercontig_1.1	934501	28.776	0.6435	-0.635988
Supercontig_1.1	935501	33.429	0.7476	-0.419662
Supercontig_1.1	936501	32.587	0.7287	-0.456603
Supercontig_1.1	937501	35.041	0.7836	-0.351811
Supercontig_1.1	938501	39.479	0.8829	-0.179678
Supercontig_1.1	939501	34.709	0.7762	-0.3655
Supercontig_1.1	940501	29.045	0.6495	-0.622599
Supercontig_1.1	941501	28.3	0.6329	-0.659951
Supercontig_1.1	942501	25.414	0.5683	-0.815275
Supercontig_1.1	943501	37.527	0.8392	-0.252913
Supercontig_1.1	944501	35.07	0.7843	-0.350522
Supercontig_1.1	945501	30.46	0.6812	-0.55385
Supercontig_1.1	946501	35.915	0.8032	-0.316169
Supercontig_1.1	947501	37.03	0.8281	-0.272123
Supercontig_1.1	948501	27.635	0.618	-0.694321
Supercontig_1.1	949501	28.997	0.6485	-0.624822
Supercontig_1.1	950501	33.589	0.7512	-0.412731
Supercontig_1.1	951501	34.415	0.7696	-0.377819
Supercontig_1.1	952501	34.416	0.7697	-0.377632
Supercontig_1.1	953501	34.518	0.7719	-0.373514
Supercontig_1.1	954501	31.21	0.698	-0.518701
Supercontig_1.1	955501	28.188	0.6304	-0.665661
Supercontig_1.1	956501	33.168	0.7417	-0.431092
Supercontig_1.1	957501	35.876	0.8023	-0.317786
Supercontig_1.1	958501	28.873	0.6457	-0.631064
Supercontig_1.1	959501	30.685	0.6862	-0.543299
Supercontig_1.1	960501	30.172	0.6747	-0.567682
Supercontig_1.1	961501	27.134	0.6068	-0.720707
Supercontig_1.1	962501	16.673	0.3729	-1.42314
Supercontig_1.1	963501	27.944	0.6249	-0.678303
Supercontig_1.1	964501	29.047	0.6496	-0.622376
Supercontig_1.1	965501	25.527	0.5709	-0.80869
Supercontig_1.1	966501	25.051	0.5602	-0.835986
Supercontig_1.1	967501	25.081	0.5609	-0.834185
Supercontig_1.1	968501	33.99	0.7601	-0.395739
Supercontig_1.1	969501	30.871	0.6904	-0.534496
Supercontig_1.1	970501	29.504	0.6598	-0.599899
Supercontig_1.1	971501	32.469	0.7261	-0.46176
Supercontig_1.1	972501	25.638	0.5733	-0.802638
Supercontig_1.1	973501	33.551	0.7503	-0.414461
Supercontig_1.1	974501	29.906	0.6688	-0.580353
Supercontig_1.1	975501	28.644	0.6406	-0.642504
Supercontig_1.1	976501	29.747	0.6652	-0.58814
Supercontig_1.1	977501	31.509	0.7046	-0.505124
Supercontig_1.1	978501	25.195	0.5634	-0.827769
Supercontig_1.1	979501	28.38	0.6347	-0.655853
Supercontig_1.1	980501	33.016	0.7383	-0.437721
Supercontig_1.1	981501	27.52	0.6154	-0.700404
Supercontig_1.1	982501	31.321	0.7004	-0.513749
Supercontig_1.1	983501	27.338	0.6114	-0.709812
Supercontig_1.1	984501	27.38	0.6123	-0.707689
Supercontig_1.1	985501	29.718	0.6646	-0.589442
Supercontig_1.1	986501	33.636	0.7522	-0.410812
Supercontig_1.1	987501	26.026	0.582	-0.780909
Supercontig_1.1	988501	31.89	0.7132	-0.487621
Supercontig_1.1	989501	28.653	0.6408	-0.642054
Supercontig_1.1	990501	31.452	0.7034	-0.507583
Supercontig_1.1	991501	26.968	0.6031	-0.729531
Supercontig_1.1	992501	33.815	0.7562	-0.40316
Supercontig_1.1	993501	24.98	0.5586	-0.840113
Supercontig_1.1	994501	31.898	0.7133	-0.487419
Supercontig_1.1	995501	33.362	0.7461	-0.422559
Supercontig_1.1	996501	30.278	0.6771	-0.562559
Supercontig_1.1	997501	29.039	0.6494	-0.622821
Supercontig_1.1	998501	22.088	0.494	-1.01742
Supercontig_1.1	999501	26.478	0.5921	-0.756087
Supercontig_1.1	1000501	23.695	0.5299	-0.916208
Supercontig_1.1	1001501	31.027	0.6939	-0.5272
Supercontig_1.1	1002501	31.909	0.7136	-0.486812
Supercontig_1.1	1003501	46.841	1.0475	0.0669502
Supercontig_1.1	1004501	21.23	0.4748	-1.07461
Supercontig_1.1	1005501	26.774	0.5988	-0.739854
Supercontig_1.1	1006501	33.607	0.7516	-0.411963
Supercontig_1.1	1007501	31.313	0.7003	-0.513955
Supercontig_1.1	1008501	31.692	0.7087	-0.496753
Supercontig_1.1	1009501	31.884	0.713	-0.488026
Supercontig_1.1	1010501	33.854	0.7571	-0.401444
Supercontig_1.1	1011501	34.921	0.7809	-0.35679
Supercontig_1.1	1012501	33.235	0.7432	-0.428178
Supercontig_1.1	1013501	38.39	0.8585	-0.22011
Supercontig_1.1	1014501	33.688	0.7534	-0.408512
Supercontig_1.1	1015501	30.071	0.6725	-0.572394
Supercontig_1.1	1016501	26.521	0.5931	-0.753653
Supercontig_1.1	1017501	27.084	0.6057	-0.723325
Supercontig_1.1	1018501	29.093	0.6506	-0.620157
Supercontig_1.1	1019501	30.681	0.6861	-0.543509
Supercontig_1.1	1020501	34.114	0.7629	-0.390434
Supercontig_1.1	1021501	31.272	0.6993	-0.516017
Supercontig_1.1	1022501	33.637	0.7522	-0.410812
Supercontig_1.1	1023501	34.224	0.7654	-0.385714
Supercontig_1.1	1024501	31.653	0.7079	-0.498383
Supercontig_1.1	1025501	25.187	0.5633	-0.828025
Supercontig_1.1	1026501	20.203	0.4518	-1.14624
Supercontig_1.1	1027501	29.598	0.6619	-0.595315
Supercontig_1.1	1028501	26.827	0.5999	-0.737206
Supercontig_1.1	1029501	26.54	0.5935	-0.75268
Supercontig_1.1	1030501	30.883	0.6906	-0.534078
Supercontig_1.1	1031501	30.321	0.6781	-0.56043
Supercontig_1.1	1032501	29.733	0.6649	-0.588791
Supercontig_1.1	1033501	30.787	0.6885	-0.538471
Supercontig_1.1	1034501	25.606	0.5726	-0.8044
Supercontig_1.1	1035501	29.06	0.6499	-0.62171
Supercontig_1.1	1036501	31.963	0.7148	-0.484388
Supercontig_1.1	1037501	23.458	0.5246	-0.93071
Supercontig_1.1	1038501	23.855	0.5335	-0.90644
Supercontig_1.1	1039501	26.341	0.5891	-0.763416
Supercontig_1.1	1040501	25.806	0.5771	-0.793107
Supercontig_1.1	1041501	28.03	0.6268	-0.673923
Supercontig_1.1	1042501	28.527	0.638	-0.648372
Supercontig_1.1	1043501	33.655	0.7526	-0.410045
Supercontig_1.1	1044501	34.315	0.7674	-0.381949
Supercontig_1.1	1045501	35.464	0.7931	-0.334425
Supercontig_1.1	1046501	23.404	0.5234	-0.934014
Supercontig_1.1	1047501	29.219	0.6534	-0.613962
Supercontig_1.1	1048501	28.209	0.6308	-0.664745
Supercontig_1.1	1049501	30.548	0.6832	-0.54962
Supercontig_1.1	1050501	36.423	0.8145	-0.296013
Supercontig_1.1	1051501	27.5	0.615	-0.701342
Supercontig_1.1	1052501	31.786	0.7108	-0.492484
Supercontig_1.1	1053501	29.071	0.6501	-0.621266
Supercontig_1.1	1054501	34.442	0.7702	-0.376695
Supercontig_1.1	1055501	31.084	0.6951	-0.524708
Supercontig_1.1	1056501	36.767	0.8222	-0.282439
Supercontig_1.1	1057501	29.137	0.6516	-0.617941
Supercontig_1.1	1058501	24.986	0.5588	-0.839596
Supercontig_1.1	1059501	26.813	0.5996	-0.737928
Supercontig_1.1	1060501	30.959	0.6923	-0.530531
Supercontig_1.1	1061501	33.453	0.7481	-0.418697
Supercontig_1.1	1062501	35.126	0.7855	-0.348317
Supercontig_1.1	1063501	34.403	0.7694	-0.378194
Supercontig_1.1	1064501	33.563	0.7506	-0.413884
Supercontig_1.1	1065501	34.591	0.7736	-0.37034
Supercontig_1.1	1066501	33.664	0.7528	-0.409661
Supercontig_1.1	1067501	28.77	0.6434	-0.636212
Supercontig_1.1	1068501	27.777	0.6212	-0.68687
Supercontig_1.1	1069501	32.998	0.7379	-0.438503
Supercontig_1.1	1070501	28.865	0.6455	-0.631511
Supercontig_1.1	1071501	31.261	0.6991	-0.516429
Supercontig_1.1	1072501	32.678	0.7308	-0.452451
Supercontig_1.1	1073501	23.761	0.5314	-0.91213
Supercontig_1.1	1074501	36.579	0.818	-0.289827
Supercontig_1.1	1075501	30.003	0.671	-0.575615
Supercontig_1.1	1076501	31.239	0.6986	-0.517461
Supercontig_1.1	1077501	39.893	0.8921	-0.164723
Supercontig_1.1	1078501	39.182	0.8762	-0.190668
Supercontig_1.1	1079501	37.181	0.8315	-0.266212
Supercontig_1.1	1080501	36.847	0.824	-0.279284
Supercontig_1.1	1081501	33.77	0.7552	-0.405069
Supercontig_1.1	1082501	30.004	0.671	-0.575615
Supercontig_1.1	1083501	28.887	0.646	-0.630394
Supercontig_1.1	1084501	32.589	0.7288	-0.456405
Supercontig_1.1	1085501	33.656	0.7527	-0.409853
Supercontig_1.1	1086501	33.147	0.7413	-0.431871
Supercontig_1.1	1087501	47.439	1.0609	0.0852887
Supercontig_1.1	1088501	35.625	0.7967	-0.327892
Supercontig_1.1	1089501	29.175	0.6524	-0.616171
Supercontig_1.1	1090501	34.676	0.7755	-0.366801
Supercontig_1.1	1091501	35.015	0.783	-0.352916
Supercontig_1.1	1092501	31.547	0.7055	-0.503282
Supercontig_1.1	1093501	30.783	0.6884	-0.538681
Supercontig_1.1	1094501	36.947	0.8263	-0.275262
Supercontig_1.1	1095501	34.218	0.7652	-0.386091
Supercontig_1.1	1096501	33.714	0.754	-0.407364
Supercontig_1.1	1097501	36.55	0.8174	-0.290886
Supercontig_1.1	1098501	33.016	0.7383	-0.437721
Supercontig_1.1	1099501	33.06	0.7393	-0.435768
Supercontig_1.1	1100501	30.276	0.6771	-0.562559
Supercontig_1.1	1101501	33.712	0.7539	-0.407555
Supercontig_1.1	1102501	31.27	0.6993	-0.516017
Supercontig_1.1	1103501	25.443	0.569	-0.813499
Supercontig_1.1	1104501	36.473	0.8157	-0.293889
Supercontig_1.1	1105501	34.728	0.7766	-0.364756
Supercontig_1.1	1106501	36.962	0.8266	-0.274739
Supercontig_1.1	1107501	32.385	0.7242	-0.46554
Supercontig_1.1	1108501	39.592	0.8854	-0.175599
Supercontig_1.1	1109501	35.142	0.7859	-0.347582
Supercontig_1.1	1110501	24.782	0.5542	-0.851521
Supercontig_1.1	1111501	38.856	0.8689	-0.202738
Supercontig_1.1	1112501	30.172	0.6747	-0.567682
Supercontig_1.1	1113501	29.024	0.6491	-0.623487
Supercontig_1.1	1114501	28.847	0.6451	-0.632405
Supercontig_1.1	1115501	28.097	0.6283	-0.670475
Supercontig_1.1	1116501	26.27	0.5875	-0.767339
Supercontig_1.1	1117501	30.909	0.6912	-0.532825
Supercontig_1.1	1118501	30.78	0.6883	-0.538891
Supercontig_1.1	1119501	40.513	0.906	-0.142417
Supercontig_1.1	1120501	22.554	0.5044	-0.98736
Supercontig_1.1	1121501	31.382	0.7018	-0.510868
Supercontig_1.1	1122501	35.481	0.7935	-0.333698
Supercontig_1.1	1123501	34.38	0.7688	-0.37932
Supercontig_1.1	1124501	33.699	0.7536	-0.408129
Supercontig_1.1	1125501	33.984	0.76	-0.395929
Supercontig_1.1	1126501	39.582	0.8852	-0.175925
Supercontig_1.1	1127501	30.319	0.678	-0.560643
Supercontig_1.1	1128501	29.357	0.6565	-0.607133
Supercontig_1.1	1129501	37.729	0.8437	-0.245198
Supercontig_1.1	1130501	28.601	0.6396	-0.644758
Supercontig_1.1	1131501	30.081	0.6727	-0.571965
Supercontig_1.1	1132501	32.782	0.7331	-0.447918
Supercontig_1.1	1133501	33.167	0.7417	-0.431092
Supercontig_1.1	1134501	30.285	0.6773	-0.562133
Supercontig_1.1	1135501	29.043	0.6495	-0.622599
Supercontig_1.1	1136501	28.365	0.6343	-0.656763
Supercontig_1.1	1137501	28.974	0.648	-0.625934
Supercontig_1.1	1138501	34.799	0.7782	-0.361787
Supercontig_1.1	1139501	30.766	0.688	-0.53952
Supercontig_1.1	1140501	35.582	0.7957	-0.329703
Supercontig_1.1	1141501	25.386	0.5677	-0.816799
Supercontig_1.1	1142501	26.095	0.5836	-0.776948
Supercontig_1.1	1143501	31.116	0.6959	-0.523048
Supercontig_1.1	1144501	39.707	0.888	-0.171368
Supercontig_1.1	1145501	27.984	0.6258	-0.676226
Supercontig_1.1	1146501	29.706	0.6643	-0.590093
Supercontig_1.1	1147501	27.33	0.6112	-0.710284
Supercontig_1.1	1148501	31.996	0.7155	-0.482976
Supercontig_1.1	1149501	35.086	0.7846	-0.349971
Supercontig_1.1	1150501	34.479	0.7711	-0.37501
Supercontig_1.1	1151501	27.041	0.6047	-0.725709
Supercontig_1.1	1152501	25.32	0.5662	-0.820616
Supercontig_1.1	1153501	30.965	0.6925	-0.530114
Supercontig_1.1	1154501	31.071	0.6948	-0.52533
Supercontig_1.1	1155501	30.768	0.6881	-0.53931
Supercontig_1.1	1156501	27.941	0.6248	-0.678534
Supercontig_1.1	1157501	35.154	0.7862	-0.347032
Supercontig_1.1	1158501	32.045	0.7166	-0.48076
Supercontig_1.1	1159501	39.856	0.8913	-0.166017
Supercontig_1.1	1160501	28.449	0.6362	-0.652448
Supercontig_1.1	1161501	27.203	0.6083	-0.717145
Supercontig_1.1	1162501	35.998	0.805	-0.312939
Supercontig_1.1	1163501	34.496	0.7714	-0.374449
Supercontig_1.1	1164501	36.564	0.8177	-0.290356
Supercontig_1.1	1165501	27.939	0.6248	-0.678534
Supercontig_1.1	1166501	28.752	0.643	-0.637109
Supercontig_1.1	1167501	28.457	0.6364	-0.651994
Supercontig_1.1	1168501	32.39	0.7243	-0.465341
Supercontig_1.1	1169501	33.671	0.753	-0.409278
Supercontig_1.1	1170501	38.34	0.8574	-0.22196
Supercontig_1.1	1171501	39.234	0.8774	-0.188693
Supercontig_1.1	1172501	33.888	0.7578	-0.400111
Supercontig_1.1	1173501	31.732	0.7096	-0.494922
Supercontig_1.1	1174501	38.021	0.8503	-0.233956
Supercontig_1.1	1175501	31.141	0.6964	-0.522012
Supercontig_1.1	1176501	30.693	0.6864	-0.542879
Supercontig_1.1	1177501	28.275	0.6323	-0.661319
Supercontig_1.1	1178501	25.343	0.5668	-0.819088
Supercontig_1.1	1179501	27.953	0.6251	-0.677841
Supercontig_1.1	1180501	32.482	0.7264	-0.461164
Supercontig_1.1	1181501	27.621	0.6177	-0.695022
Supercontig_1.1	1182501	29.909	0.6689	-0.580138
Supercontig_1.1	1183501	24.098	0.5389	-0.891911
Supercontig_1.1	1184501	32.553	0.728	-0.45799
Supercontig_1.1	1185501	32.934	0.7365	-0.441243
Supercontig_1.1	1186501	33.786	0.7556	-0.404305
Supercontig_1.1	1187501	40.295	0.9011	-0.150241
Supercontig_1.1	1188501	36.366	0.8133	-0.29814
Supercontig_1.1	1189501	40.81	0.9126	-0.131945
Supercontig_1.1	1190501	32.732	0.732	-0.450084
Supercontig_1.1	1191501	35.058	0.784	-0.351074
Supercontig_1.1	1192501	35.091	0.7847	-0.349787
Supercontig_1.1	1193501	31.7	0.7089	-0.496346
Supercontig_1.1	1194501	38.653	0.8644	-0.210229
Supercontig_1.1	1195501	24.511	0.5481	-0.867489
Supercontig_1.1	1196501	27.992	0.626	-0.675765
Supercontig_1.1	1197501	33.176	0.7419	-0.430703
Supercontig_1.1	1198501	32.28	0.7219	-0.470129
Supercontig_1.1	1199501	36.157	0.8086	-0.306502
Supercontig_1.1	1200501	30.688	0.6863	-0.543089
Supercontig_1.1	1201501	28.795	0.6439	-0.635091
Supercontig_1.1	1202501	29.411	0.6577	-0.604498
Supercontig_1.1	1203501	34.099	0.7626	-0.391002
Supercontig_1.1	1204501	29.657	0.6632	-0.592484
Supercontig_1.1	1205501	26.647	0.5959	-0.746858
Supercontig_1.1	1206501	34.787	0.7779	-0.362343
Supercontig_1.1	1207501	30.698	0.6865	-0.542668
Supercontig_1.1	1208501	33.988	0.7601	-0.395739
Supercontig_1.1	1209501	31.308	0.7001	-0.514367
Supercontig_1.1	1210501	36.726	0.8213	-0.284019
Supercontig_1.1	1211501	28.786	0.6437	-0.63554
Supercontig_1.1	1212501	33.097	0.7402	-0.434013
Supercontig_1.1	1213501	32.468	0.7261	-0.46176
Supercontig_1.1	1214501	37.243	0.8329	-0.263785
Supercontig_1.1	1215501	29.515	0.66	-0.599462
Supercontig_1.1	1216501	29.592	0.6618	-0.595533
Supercontig_1.1	1217501	33.691	0.7534	-0.408512
Supercontig_1.1	1218501	30.395	0.6797	-0.55703
Supercontig_1.1	1219501	27.535	0.6158	-0.699466
Supercontig_1.1	1220501	35.1	0.7849	-0.349419
Supercontig_1.1	1221501	37.842	0.8463	-0.240759
Supercontig_1.1	1222501	30.922	0.6915	-0.532199
Supercontig_1.1	1223501	34.65	0.7749	-0.367918
Supercontig_1.1	1224501	36.108	0.8075	-0.308466
Supercontig_1.1	1225501	34.724	0.7765	-0.364942
Supercontig_1.1	1226501	31.12	0.6959	-0.523048
Supercontig_1.1	1227501	29.347	0.6563	-0.607573
Supercontig_1.1	1228501	23.892	0.5343	-0.904278
Supercontig_1.1	1229501	33.97	0.7597	-0.396498
Supercontig_1.1	1230501	30.511	0.6823	-0.551522
Supercontig_1.1	1231501	33.96	0.7595	-0.396878
Supercontig_1.1	1232501	31.808	0.7113	-0.49147
Supercontig_1.1	1233501	38.522	0.8615	-0.215077
Supercontig_1.1	1234501	39.842	0.891	-0.166503
Supercontig_1.1	1235501	34.91	0.7807	-0.35716
Supercontig_1.1	1236501	37.797	0.8453	-0.242465
Supercontig_1.1	1237501	36.907	0.8254	-0.276835
Supercontig_1.1	1238501	32.868	0.735	-0.444184
Supercontig_1.1	1239501	30.227	0.676	-0.564905
Supercontig_1.1	1240501	33.534	0.7499	-0.41523
Supercontig_1.1	1241501	37.817	0.8457	-0.241782
Supercontig_1.1	1242501	35.278	0.7889	-0.342086
Supercontig_1.1	1243501	38.291	0.8563	-0.223812
Supercontig_1.1	1244501	38.78	0.8672	-0.205563
Supercontig_1.1	1245501	36.054	0.8063	-0.310611
Supercontig_1.1	1246501	31.533	0.7052	-0.503896
Supercontig_1.1	1247501	33.622	0.7519	-0.411387
Supercontig_1.1	1248501	35.541	0.7948	-0.331336
Supercontig_1.1	1249501	40.332	0.902	-0.148801
Supercontig_1.1	1250501	35.55	0.795	-0.330973
Supercontig_1.1	1251501	33.167	0.7417	-0.431092
Supercontig_1.1	1252501	36.367	0.8133	-0.29814
Supercontig_1.1	1253501	27.853	0.6229	-0.682928
Supercontig_1.1	1254501	34.837	0.7791	-0.36012
Supercontig_1.1	1255501	29.032	0.6492	-0.623265
Supercontig_1.1	1256501	29.212	0.6533	-0.614182
Supercontig_1.1	1257501	36.118	0.8077	-0.308109
Supercontig_1.1	1258501	32.973	0.7374	-0.439481
Supercontig_1.1	1259501	30.606	0.6844	-0.547088
Supercontig_1.1	1260501	39.699	0.8878	-0.171693
Supercontig_1.1	1261501	38.216	0.8546	-0.226679
Supercontig_1.1	1262501	37.188	0.8316	-0.266038
Supercontig_1.1	1263501	40.903	0.9147	-0.128629
Supercontig_1.1	1264501	31.706	0.709	-0.496142
Supercontig_1.1	1265501	35.328	0.79	-0.340075
Supercontig_1.1	1266501	32.987	0.7377	-0.438894
Supercontig_1.1	1267501	37.696	0.843	-0.246395
Supercontig_1.1	1268501	37.079	0.8292	-0.270208
Supercontig_1.1	1269501	39.662	0.887	-0.172994
Supercontig_1.1	1270501	31.594	0.7065	-0.501239
Supercontig_1.1	1271501	36.914	0.8255	-0.27666
Supercontig_1.1	1272501	38.937	0.8708	-0.199587
Supercontig_1.1	1273501	31.242	0.6987	-0.517255
Supercontig_1.1	1274501	41.463	0.9272	-0.109048
Supercontig_1.1	1275501	41.03	0.9176	-0.124063
Supercontig_1.1	1276501	43.213	0.9664	-0.0493076
Supercontig_1.1	1277501	31.276	0.6994	-0.51581
Supercontig_1.1	1278501	38.276	0.856	-0.224317
Supercontig_1.1	1279501	38.454	0.86	-0.217591
Supercontig_1.1	1280501	30.092	0.673	-0.571322
Supercontig_1.1	1281501	27.737	0.6203	-0.688962
Supercontig_1.1	1282501	29.412	0.6577	-0.604498
Supercontig_1.1	1283501	44.919	1.0045	0.00647756
Supercontig_1.1	1284501	37.035	0.8282	-0.271949
Supercontig_1.1	1285501	38.313	0.8568	-0.22297
Supercontig_1.1	1286501	28.36	0.6342	-0.65699
Supercontig_1.1	1287501	30.802	0.6888	-0.537843
Supercontig_1.1	1288501	33.197	0.7424	-0.429731
Supercontig_1.1	1289501	31.348	0.701	-0.512514
Supercontig_1.1	1290501	34.057	0.7616	-0.392895
Supercontig_1.1	1291501	41.297	0.9235	-0.114816
Supercontig_1.1	1292501	35.491	0.7937	-0.333334
Supercontig_1.1	1293501	38.837	0.8685	-0.203402
Supercontig_1.1	1294501	40.571	0.9073	-0.140348
Supercontig_1.1	1295501	34.486	0.7712	-0.374823
Supercontig_1.1	1296501	32.261	0.7215	-0.470929
Supercontig_1.1	1297501	39.84	0.8909	-0.166665
Supercontig_1.1	1298501	41.506	0.9282	-0.107492
Supercontig_1.1	1299501	40.088	0.8965	-0.157625
Supercontig_1.1	1300501	37.305	0.8343	-0.261362
Supercontig_1.1	1301501	35.66	0.7975	-0.326444
Supercontig_1.1	1302501	40.058	0.8958	-0.158751
Supercontig_1.1	1303501	33.5	0.7492	-0.416577
Supercontig_1.1	1304501	40.835	0.9132	-0.130997
Supercontig_1.1	1305501	30.353	0.6788	-0.558942
Supercontig_1.1	1306501	36.317	0.8122	-0.300093
Supercontig_1.1	1307501	38.639	0.8641	-0.21073
Supercontig_1.1	1308501	40.776	0.9119	-0.133052
Supercontig_1.1	1309501	38.753	0.8666	-0.206562
Supercontig_1.1	1310501	37.93	0.8482	-0.237524
Supercontig_1.1	1311501	36.196	0.8095	-0.304897
Supercontig_1.1	1312501	36.175	0.809	-0.305788
Supercontig_1.1	1313501	32.875	0.7352	-0.443791
Supercontig_1.1	1314501	37.586	0.8405	-0.25068
Supercontig_1.1	1315501	38.109	0.8522	-0.230736
Supercontig_1.1	1316501	31.858	0.7124	-0.489241
Supercontig_1.1	1317501	38.431	0.8594	-0.218598
Supercontig_1.1	1318501	40.592	0.9078	-0.139554
Supercontig_1.1	1319501	34.248	0.7659	-0.384772
Supercontig_1.1	1320501	36.642	0.8194	-0.28736
Supercontig_1.1	1321501	40.328	0.9019	-0.148961
Supercontig_1.1	1322501	36.51	0.8165	-0.292475
Supercontig_1.1	1323501	41.585	0.93	-0.104697
Supercontig_1.1	1324501	42.995	0.9615	-0.0566412
Supercontig_1.1	1325501	38.659	0.8645	-0.210062
Supercontig_1.1	1326501	42.769	0.9565	-0.0641631
Supercontig_1.1	1327501	44.782	1.0015	0.00216242
Supercontig_1.1	1328501	43.152	0.965	-0.0513992
Supercontig_1.1	1329501	39.254	0.8778	-0.188036
Supercontig_1.1	1330501	38.592	0.863	-0.212568
Supercontig_1.1	1331501	35.213	0.7875	-0.344648
Supercontig_1.1	1332501	37.137	0.8305	-0.267948
Supercontig_1.1	1333501	38.293	0.8564	-0.223643
Supercontig_1.1	1334501	43.741	0.9782	-0.0317986
Supercontig_1.1	1335501	40.14	0.8977	-0.155695
Supercontig_1.1	1336501	40.67	0.9095	-0.136854
Supercontig_1.1	1337501	40.466	0.9049	-0.14417
Supercontig_1.1	1338501	35.44	0.7926	-0.335335
Supercontig_1.1	1339501	39.991	0.8943	-0.161169
Supercontig_1.1	1340501	48.678	1.0886	0.122474
Supercontig_1.1	1341501	40.538	0.9066	-0.141462
Supercontig_1.1	1342501	46.989	1.0508	0.0714881
Supercontig_1.1	1343501	39.722	0.8883	-0.170881
Supercontig_1.1	1344501	41.44	0.9267	-0.109826
Supercontig_1.1	1345501	42.118	0.9419	-0.0863542
Supercontig_1.1	1346501	50.997	1.1405	0.189666
Supercontig_1.1	1347501	40.299	0.9012	-0.150081
Supercontig_1.1	1348501	44.505	0.9953	-0.00679665
Supercontig_1.1	1349501	43.896	0.9817	-0.0266459
Supercontig_1.1	1350501	35.084	0.7846	-0.349971
Supercontig_1.1	1351501	42.93	0.9601	-0.0587434
Supercontig_1.1	1352501	39.237	0.8775	-0.188529
Supercontig_1.1	1353501	49.325	1.1031	0.141564
Supercontig_1.1	1354501	47.548	1.0633	0.0885487
Supercontig_1.1	1355501	37.569	0.8402	-0.251195
Supercontig_1.1	1356501	36.184	0.8092	-0.305432
Supercontig_1.1	1357501	50.227	1.1232	0.167615
Supercontig_1.1	1358501	45.337	1.0139	0.0199154
Supercontig_1.1	1359501	46.7	1.0444	0.0626744
Supercontig_1.1	1360501	46.576	1.0416	0.0588014
Supercontig_1.1	1361501	48.189	1.0777	0.107956
Supercontig_1.1	1362501	40.775	0.9119	-0.133052
Supercontig_1.1	1363501	47.916	1.0716	0.0997665
Supercontig_1.1	1364501	50.59	1.1314	0.178109
Supercontig_1.1	1365501	55.26	1.2358	0.305445
Supercontig_1.1	1366501	55.738	1.2465	0.317883
Supercontig_1.1	1367501	53.271	1.1913	0.252537
Supercontig_1.1	1368501	53.097	1.1874	0.247806
Supercontig_1.1	1369501	54.072	1.2092	0.274053
Supercontig_1.1	1370501	57.194	1.279	0.355016
Supercontig_1.1	1371501	52.212	1.1676	0.223546
Supercontig_1.1	1372501	50.322	1.1254	0.170438
Supercontig_1.1	1373501	46.529	1.0405	0.057277
Supercontig_1.1	1374501	52.96	1.1844	0.244156
Supercontig_1.1	1375501	43.871	0.9811	-0.0275279
Supercontig_1.1	1376501	49.59	1.109	0.149259
Supercontig_1.1	1377501	55.498	1.2411	0.311619
Supercontig_1.1	1378501	48.934	1.0943	0.130008
Supercontig_1.1	1379501	56.798	1.2702	0.345056
Supercontig_1.1	1380501	46.48	1.0394	0.055751
Supercontig_1.1	1381501	36.048	0.8061	-0.310969
Supercontig_1.1	1382501	39.918	0.8927	-0.163753
Supercontig_1.1	1383501	42.794	0.957	-0.0634092
Supercontig_1.1	1384501	52.16	1.1665	0.222186
Supercontig_1.1	1385501	50.483	1.129	0.175045
Supercontig_1.1	1386501	58.328	1.3044	0.383386
Supercontig_1.1	1387501	53.169	1.189	0.249749
Supercontig_1.1	1388501	47.481	1.0618	0.086512
Supercontig_1.1	1389501	47.588	1.0642	0.0897693
Supercontig_1.1	1390501	59.418	1.3288	0.410124
Supercontig_1.1	1391501	54.097	1.2098	0.274769
Supercontig_1.1	1392501	52.678	1.178	0.23634
Supercontig_1.1	1393501	47.239	1.0564	0.0791562
Supercontig_1.1	1394501	54.231	1.2128	0.278342
Supercontig_1.1	1395501	52.512	1.1743	0.231801
Supercontig_1.1	1396501	68.968	1.5423	0.625083
Supercontig_1.1	1397501	60.681	1.357	0.440421
Supercontig_1.1	1398501	54.834	1.2263	0.294312
Supercontig_1.1	1399501	51.171	1.1443	0.194465
Supercontig_1.1	1400501	63.3	1.4156	0.501414
Supercontig_1.1	1401501	44.84	1.0028	0.0040339
Supercontig_1.1	1402501	58.483	1.3079	0.387252
Supercontig_1.1	1403501	53.551	1.1976	0.260146
Supercontig_1.1	1404501	50.93	1.139	0.187768
Supercontig_1.1	1405501	56.09	1.2544	0.326997
Supercontig_1.1	1406501	57.238	1.28	0.356144
Supercontig_1.1	1407501	50.597	1.1315	0.178237
Supercontig_1.1	1408501	59.66	1.3342	0.415975
Supercontig_1.1	1409501	60.233	1.347	0.42975
Supercontig_1.1	1410501	66.565	1.4886	0.573956
Supercontig_1.1	1411501	74.258	1.6606	0.731705
Supercontig_1.1	1412501	69.009	1.5433	0.626019
Supercontig_1.1	1413501	59.067	1.3209	0.401521
Supercontig_1.1	1414501	65.934	1.4745	0.560226
Supercontig_1.1	1415501	59.905	1.3397	0.42191
Supercontig_1.1	1416501	51.343	1.1482	0.199374
Supercontig_1.1	1417501	62.359	1.3945	0.479748
Supercontig_1.1	1418501	58.277	1.3033	0.382169
Supercontig_1.1	1419501	56.94	1.2734	0.348686
Supercontig_1.1	1420501	60.025	1.3424	0.424815
Supercontig_1.1	1421501	59.486	1.3303	0.411752
Supercontig_1.1	1422501	61.03	1.3648	0.44869
Supercontig_1.1	1423501	54.594	1.2209	0.287945
Supercontig_1.1	1424501	69.52	1.5547	0.636636
Supercontig_1.1	1425501	56.392	1.2611	0.334683
Supercontig_1.1	1426501	67.29	1.5048	0.589572
Supercontig_1.1	1427501	70.524	1.5771	0.657274
Supercontig_1.1	1428501	59.757	1.3364	0.418352
Supercontig_1.1	1429501	63.392	1.4176	0.503451
Supercontig_1.1	1430501	71.002	1.5878	0.667029
Supercontig_1.1	1431501	68.029	1.5213	0.605305
Supercontig_1.1	1432501	61.949	1.3854	0.470303
Supercontig_1.1	1433501	61.901	1.3843	0.469157
Supercontig_1.1	1434501	67.956	1.5197	0.603787
Supercontig_1.1	1435501	63.574	1.4217	0.507617
Supercontig_1.1	1436501	64.908	1.4515	0.537545
Supercontig_1.1	1437501	65.398	1.4625	0.548437
Supercontig_1.1	1438501	56.044	1.2533	0.325732
Supercontig_1.1	1439501	61.823	1.3826	0.467384
Supercontig_1.1	1440501	73.815	1.6507	0.723078
Supercontig_1.1	1441501	67.444	1.5083	0.592923
Supercontig_1.1	1442501	74.271	1.6609	0.731965
Supercontig_1.1	1443501	69.303	1.5498	0.632082
Supercontig_1.1	1444501	63.327	1.4162	0.502025
Supercontig_1.1	1445501	50.329	1.1255	0.170566
Supercontig_1.1	1446501	72.391	1.6189	0.695014
Supercontig_1.1	1447501	62.65	1.4011	0.48656
Supercontig_1.1	1448501	67.005	1.4984	0.583423
Supercontig_1.1	1449501	68.59	1.5339	0.617204
Supercontig_1.1	1450501	61.72	1.3803	0.464982
Supercontig_1.1	1451501	68.25	1.5263	0.610039
Supercontig_1.1	1452501	81.864	1.8307	0.872395
Supercontig_1.1	1453501	74.138	1.658	0.729444
Supercontig_1.1	1454501	72.996	1.6324	0.706995
Supercontig_1.1	1455501	83.715	1.8721	0.904657
Supercontig_1.1	1456501	39.25	0.8778	-0.188036
Supercontig_1.1	1457501	66.649	1.4905	0.575796
Supercontig_1.1	1458501	61.228	1.3693	0.453439
Supercontig_1.1	1459501	75.086	1.6792	0.747774
Supercontig_1.1	1460501	65.331	1.461	0.546956
Supercontig_1.1	1461501	61.175	1.3681	0.452174
Supercontig_1.1	1462501	84.791	1.8962	0.923111
Supercontig_1.1	1463501	46.416	1.038	0.0538064
Supercontig_1.1	1464501	73.618	1.6463	0.719227
Supercontig_1.1	1465501	71.844	1.6067	0.684101
Supercontig_1.1	1466501	62.688	1.4019	0.487383
Supercontig_1.1	1467501	67.131	1.5013	0.586212
Supercontig_1.1	1468501	54.35	1.2154	0.281431
Supercontig_1.1	1469501	96.981	2.1688	1.1169
Supercontig_1.2	501	87.924	1.9663	0.975483
Supercontig_1.2	1501	74.921	1.6755	0.744592
Supercontig_1.2	2501	68.566	1.5334	0.616734
Supercontig_1.2	3501	73.651	1.6471	0.719928
Supercontig_1.2	4501	67.021	1.4988	0.583808
Supercontig_1.2	5501	72.562	1.6227	0.698396
Supercontig_1.2	6501	72.372	1.6185	0.694657
Supercontig_1.2	7501	74.264	1.6608	0.731878
Supercontig_1.2	8501	73.316	1.6396	0.713344
Supercontig_1.2	9501	69.231	1.5482	0.630592
Supercontig_1.2	10501	62.806	1.4045	0.490057
Supercontig_1.2	11501	65.924	1.4743	0.56003
Supercontig_1.2	12501	75.72	1.6933	0.759838
Supercontig_1.2	13501	69.637	1.5573	0.639047
Supercontig_1.2	14501	68.325	1.528	0.611645
Supercontig_1.2	15501	57.569	1.2874	0.36446
Supercontig_1.2	16501	55.928	1.2507	0.322736
Supercontig_1.2	17501	56.087	1.2543	0.326882
Supercontig_1.2	18501	75.668	1.6922	0.7589
Supercontig_1.2	19501	67.57	1.5111	0.595599
Supercontig_1.2	20501	70.626	1.5794	0.659377
Supercontig_1.2	21501	70.534	1.5774	0.657549
Supercontig_1.2	22501	62.253	1.3922	0.477366
Supercontig_1.2	23501	58.165	1.3008	0.379399
Supercontig_1.2	24501	79.601	1.7801	0.831958
Supercontig_1.2	25501	66.808	1.494	0.57918
Supercontig_1.2	26501	87.067	1.9471	0.961327
Supercontig_1.2	27501	77.433	1.7316	0.792106
Supercontig_1.2	28501	63.089	1.4109	0.496616
Supercontig_1.2	29501	54.692	1.2231	0.290542
Supercontig_1.2	30501	69.677	1.5582	0.63988
Supercontig_1.2	31501	53.927	1.206	0.27023
Supercontig_1.2	32501	70.182	1.5695	0.650305
Supercontig_1.2	33501	63.418	1.4182	0.504061
Supercontig_1.2	34501	70.113	1.568	0.648926
Supercontig_1.2	35501	64.49	1.4422	0.528271
Supercontig_1.2	36501	70.082	1.5673	0.648281
Supercontig_1.2	37501	67.74	1.5149	0.599223
Supercontig_1.2	38501	79.749	1.7834	0.83463
Supercontig_1.2	39501	75.403	1.6863	0.753861
Supercontig_1.2	40501	55.216	1.2348	0.304277
Supercontig_1.2	41501	71.519	1.5994	0.677531
Supercontig_1.2	42501	52.599	1.1763	0.234256
Supercontig_1.2	43501	64.117	1.4339	0.519944
Supercontig_1.2	44501	56.858	1.2715	0.346531
Supercontig_1.2	45501	49.556	1.1082	0.148218
Supercontig_1.2	46501	67.078	1.5001	0.585059
Supercontig_1.2	47501	65.036	1.4544	0.540424
Supercontig_1.2	48501	60.013	1.3421	0.424492
Supercontig_1.2	49501	48.417	1.0828	0.114767
Supercontig_1.2	50501	50.439	1.128	0.173767
Supercontig_1.2	51501	46.899	1.0488	0.0687396
Supercontig_1.2	52501	67.523	1.51	0.594549
Supercontig_1.2	53501	65.422	1.463	0.54893
Supercontig_1.2	54501	63.244	1.4143	0.500088
Supercontig_1.2	55501	63.269	1.4149	0.5007
Supercontig_1.2	56501	65.074	1.4553	0.541317
Supercontig_1.2	57501	46.113	1.0312	0.0443242
Supercontig_1.2	58501	66.829	1.4945	0.579663
Supercontig_1.2	59501	55.672	1.245	0.316146
Supercontig_1.2	60501	61.611	1.3778	0.462366
Supercontig_1.2	61501	69.807	1.5611	0.642563
Supercontig_1.2	62501	64.965	1.4528	0.538836
Supercontig_1.2	63501	61.225	1.3692	0.453333
Supercontig_1.2	64501	45.745	1.023	0.0328061
Supercontig_1.2	65501	61.596	1.3775	0.462052
Supercontig_1.2	66501	58.831	1.3156	0.395721
Supercontig_1.2	67501	62.899	1.4066	0.492212
Supercontig_1.2	68501	60.911	1.3622	0.445939
Supercontig_1.2	69501	49.118	1.0984	0.135404
Supercontig_1.2	70501	60.105	1.3441	0.42664
Supercontig_1.2	71501	62.267	1.3925	0.477677
Supercontig_1.2	72501	48.094	1.0755	0.105008
Supercontig_1.2	73501	55.661	1.2448	0.315914
Supercontig_1.2	74501	60.126	1.3446	0.427177
Supercontig_1.2	75501	51.404	1.1496	0.201132
Supercontig_1.2	76501	56.587	1.2655	0.339708
Supercontig_1.2	77501	48.036	1.0742	0.103263
Supercontig_1.2	78501	60.96	1.3633	0.447103
Supercontig_1.2	79501	54.816	1.2259	0.293841
Supercontig_1.2	80501	58.475	1.3077	0.387032
Supercontig_1.2	81501	57.575	1.2876	0.364684
Supercontig_1.2	82501	59.59	1.3326	0.414244
Supercontig_1.2	83501	57.419	1.2841	0.360758
Supercontig_1.2	84501	56.299	1.259	0.332278
Supercontig_1.2	85501	50.481	1.1289	0.174918
Supercontig_1.2	86501	49.71	1.1117	0.152768
Supercontig_1.2	87501	65.468	1.4641	0.550014
Supercontig_1.2	88501	59.144	1.3226	0.403377
Supercontig_1.2	89501	47.058	1.0524	0.0736832
Supercontig_1.2	90501	47.702	1.0668	0.0932897
Supercontig_1.2	91501	44.804	1.002	0.00288251
Supercontig_1.2	92501	46.085	1.0306	0.0434845
Supercontig_1.2	93501	53.633	1.1994	0.262313
Supercontig_1.2	94501	51.709	1.1564	0.209641
Supercontig_1.2	95501	53.49	1.1962	0.258459
Supercontig_1.2	96501	38.155	0.8533	-0.228875
Supercontig_1.2	97501	43.736	0.9781	-0.0319461
Supercontig_1.2	98501	41.657	0.9316	-0.102217
Supercontig_1.2	99501	58.962	1.3186	0.399007
Supercontig_1.2	100501	43.863	0.9809	-0.027822
Supercontig_1.2	101501	53.938	1.2062	0.270469
Supercontig_1.2	102501	55.387	1.2386	0.30871
Supercontig_1.2	103501	48.992	1.0956	0.131721
Supercontig_1.2	104501	44.867	1.0034	0.00489684
Supercontig_1.2	105501	47.854	1.0702	0.0978804
Supercontig_1.2	106501	46.417	1.038	0.0538064
Supercontig_1.2	107501	46.336	1.0362	0.0513025
Supercontig_1.2	108501	57.752	1.2915	0.369048
Supercontig_1.2	109501	48.987	1.0955	0.131589
Supercontig_1.2	110501	49.08	1.0976	0.134352
Supercontig_1.2	111501	46.164	1.0324	0.046002
Supercontig_1.2	112501	45.456	1.0165	0.0236102
Supercontig_1.2	113501	45.891	1.0263	0.0374525
Supercontig_1.2	114501	46.1	1.0309	0.0439044
Supercontig_1.2	115501	43.173	0.9655	-0.0506518
Supercontig_1.2	116501	52.57	1.1756	0.233397
Supercontig_1.2	117501	45.746	1.023	0.0328061
Supercontig_1.2	118501	47.009	1.0513	0.0721744
Supercontig_1.2	119501	48.005	1.0735	0.102322
Supercontig_1.2	120501	42.143	0.9425	-0.0854355
Supercontig_1.2	121501	39.093	0.8742	-0.193965
Supercontig_1.2	122501	40.71	0.9104	-0.135428
Supercontig_1.2	123501	43.011	0.9619	-0.0560412
Supercontig_1.2	124501	45.976	1.0282	0.0401209
Supercontig_1.2	125501	49.775	1.1131	0.154583
Supercontig_1.2	126501	36.384	0.8137	-0.297431
Supercontig_1.2	127501	44.36	0.992	-0.011588
Supercontig_1.2	128501	41.182	0.921	-0.118727
Supercontig_1.2	129501	41.91	0.9372	-0.0935711
Supercontig_1.2	130501	45.651	1.0209	0.0298416
Supercontig_1.2	131501	37.73	0.8438	-0.245027
Supercontig_1.2	132501	46.408	1.0378	0.0535284
Supercontig_1.2	133501	47.153	1.0545	0.0765591
Supercontig_1.2	134501	44.356	0.9919	-0.0117334
Supercontig_1.2	135501	41.004	0.917	-0.125006
Supercontig_1.2	136501	38.752	0.8666	-0.206562
Supercontig_1.2	137501	45.011	1.0066	0.0094905
Supercontig_1.2	138501	45.86	1.0256	0.0364682
Supercontig_1.2	139501	46.738	1.0452	0.063779
Supercontig_1.2	140501	32.059	0.7169	-0.480156
Supercontig_1.2	141501	33.117	0.7406	-0.433234
Supercontig_1.2	142501	35.985	0.8047	-0.313477
Supercontig_1.2	143501	50.793	1.1359	0.183836
Supercontig_1.2	144501	39.838	0.8909	-0.166665
Supercontig_1.2	145501	46.512	1.0402	0.0568609
Supercontig_1.2	146501	40.511	0.906	-0.142417
Supercontig_1.2	147501	44.14	0.9871	-0.0187318
Supercontig_1.2	148501	37.201	0.8319	-0.265518
Supercontig_1.2	149501	37.631	0.8415	-0.248965
Supercontig_1.2	150501	45.673	1.0214	0.030548
Supercontig_1.2	151501	37.624	0.8414	-0.249136
Supercontig_1.2	152501	37.813	0.8456	-0.241953
Supercontig_1.2	153501	39.032	0.8729	-0.196112
Supercontig_1.2	154501	35.187	0.7869	-0.345748
Supercontig_1.2	155501	29.385	0.6571	-0.605815
Supercontig_1.2	156501	34.103	0.7627	-0.390812
Supercontig_1.2	157501	27.897	0.6239	-0.680613
Supercontig_1.2	158501	28.553	0.6385	-0.647241
Supercontig_1.2	159501	32.214	0.7204	-0.47313
Supercontig_1.2	160501	36.542	0.8172	-0.291239
Supercontig_1.2	161501	37.68	0.8426	-0.24708
Supercontig_1.2	162501	37.148	0.8307	-0.267601
Supercontig_1.2	163501	42.123	0.942	-0.086201
Supercontig_1.2	164501	36.946	0.8262	-0.275437
Supercontig_1.2	165501	33.137	0.741	-0.432455
Supercontig_1.2	166501	36.14	0.8082	-0.307216
Supercontig_1.2	167501	34.203	0.7649	-0.386657
Supercontig_1.2	168501	41.291	0.9234	-0.114972
Supercontig_1.2	169501	33.826	0.7565	-0.402588
Supercontig_1.2	170501	39.514	0.8837	-0.178371
Supercontig_1.2	171501	36.348	0.8129	-0.29885
Supercontig_1.2	172501	44.74	1.0005	0.000721167
Supercontig_1.2	173501	39.64	0.8865	-0.173807
Supercontig_1.2	174501	40.217	0.8994	-0.152965
Supercontig_1.2	175501	38.509	0.8612	-0.21558
Supercontig_1.2	176501	38.002	0.8498	-0.234805
Supercontig_1.2	177501	32.981	0.7376	-0.439089
Supercontig_1.2	178501	33.035	0.7388	-0.436744
Supercontig_1.2	179501	33.844	0.7569	-0.401825
Supercontig_1.2	180501	47.586	1.0642	0.0897693
Supercontig_1.2	181501	45.101	1.0086	0.0123541
Supercontig_1.2	182501	39.596	0.8855	-0.175436
Supercontig_1.2	183501	39.114	0.8747	-0.19314
Supercontig_1.2	184501	48.324	1.0807	0.111966
Supercontig_1.2	185501	40.679	0.9097	-0.136537
Supercontig_1.2	186501	38.898	0.8699	-0.201079
Supercontig_1.2	187501	35.753	0.7996	-0.32265
Supercontig_1.2	188501	28.81	0.6443	-0.634196
Supercontig_1.2	189501	39.303	0.8789	-0.186229
Supercontig_1.2	190501	31.863	0.7126	-0.488836
Supercontig_1.2	191501	27.364	0.6119	-0.708632
Supercontig_1.2	192501	28.443	0.6361	-0.652675
Supercontig_1.2	193501	38.463	0.8602	-0.217256
Supercontig_1.2	194501	36.726	0.8213	-0.284019
Supercontig_1.2	195501	36.72	0.8212	-0.284194
Supercontig_1.2	196501	38.908	0.8701	-0.200747
Supercontig_1.2	197501	34.043	0.7613	-0.393463
Supercontig_1.2	198501	32.128	0.7185	-0.47694
Supercontig_1.2	199501	35.431	0.7924	-0.335699
Supercontig_1.2	200501	32.67	0.7306	-0.452846
Supercontig_1.2	201501	35.184	0.7868	-0.345931
Supercontig_1.2	202501	37.684	0.8427	-0.246909
Supercontig_1.2	203501	37.368	0.8357	-0.258943
Supercontig_1.2	204501	31.784	0.7108	-0.492484
Supercontig_1.2	205501	38.406	0.8589	-0.219438
Supercontig_1.2	206501	37.628	0.8415	-0.248965
Supercontig_1.2	207501	31.108	0.6957	-0.523463
Supercontig_1.2	208501	32.997	0.7379	-0.438503
Supercontig_1.2	209501	32.864	0.7349	-0.44438
Supercontig_1.2	210501	36.65	0.8196	-0.287008
Supercontig_1.2	211501	33.387	0.7466	-0.421593
Supercontig_1.2	212501	25.127	0.5619	-0.831615
Supercontig_1.2	213501	30.978	0.6928	-0.529489
Supercontig_1.2	214501	33.861	0.7572	-0.401254
Supercontig_1.2	215501	35.731	0.7991	-0.323552
Supercontig_1.2	216501	31.463	0.7036	-0.507173
Supercontig_1.2	217501	31.938	0.7142	-0.4856
Supercontig_1.2	218501	30.514	0.6824	-0.55131
Supercontig_1.2	219501	37.028	0.8281	-0.272123
Supercontig_1.2	220501	33.153	0.7414	-0.431676
Supercontig_1.2	221501	48.367	1.0816	0.113167
Supercontig_1.2	222501	29.498	0.6597	-0.600118
Supercontig_1.2	223501	37.192	0.8317	-0.265865
Supercontig_1.2	224501	33.483	0.7488	-0.417348
Supercontig_1.2	225501	28.548	0.6384	-0.647467
Supercontig_1.2	226501	32.136	0.7187	-0.476538
Supercontig_1.2	227501	35.74	0.7993	-0.323191
Supercontig_1.2	228501	33.82	0.7563	-0.402969
Supercontig_1.2	229501	31.638	0.7075	-0.499198
Supercontig_1.2	230501	32.508	0.727	-0.459973
Supercontig_1.2	231501	42.165	0.9429	-0.0848233
Supercontig_1.2	232501	43.73	0.9779	-0.0322412
Supercontig_1.2	233501	25.418	0.5684	-0.815022
Supercontig_1.2	234501	32.008	0.7158	-0.482372
Supercontig_1.2	235501	37.114	0.83	-0.268817
Supercontig_1.2	236501	37.011	0.8277	-0.27282
Supercontig_1.2	237501	29.484	0.6594	-0.600774
Supercontig_1.2	238501	33.767	0.7551	-0.40526
Supercontig_1.2	239501	33.649	0.7525	-0.410237
Supercontig_1.2	240501	35.558	0.7952	-0.33061
Supercontig_1.2	241501	31.014	0.6936	-0.527824
Supercontig_1.2	242501	34.947	0.7815	-0.355682
Supercontig_1.2	243501	30.199	0.6753	-0.5664
Supercontig_1.2	244501	34.653	0.775	-0.367732
Supercontig_1.2	245501	31.705	0.709	-0.496142
Supercontig_1.2	246501	34.614	0.7741	-0.369408
Supercontig_1.2	247501	32.756	0.7325	-0.449099
Supercontig_1.2	248501	32.8	0.7335	-0.447131
Supercontig_1.2	249501	33.196	0.7424	-0.429731
Supercontig_1.2	250501	33.277	0.7442	-0.426238
Supercontig_1.2	251501	33.567	0.7507	-0.413692
Supercontig_1.2	252501	27.456	0.614	-0.703689
Supercontig_1.2	253501	35.405	0.7918	-0.336792
Supercontig_1.2	254501	30.766	0.688	-0.53952
Supercontig_1.2	255501	31.187	0.6974	-0.519942
Supercontig_1.2	256501	29.594	0.6618	-0.595533
Supercontig_1.2	257501	31.756	0.7102	-0.493703
Supercontig_1.2	258501	29.981	0.6705	-0.576691
Supercontig_1.2	259501	29.435	0.6583	-0.603183
Supercontig_1.2	260501	28.934	0.6471	-0.627939
Supercontig_1.2	261501	30.459	0.6812	-0.55385
Supercontig_1.2	262501	27.489	0.6147	-0.702046
Supercontig_1.2	263501	39.607	0.8857	-0.17511
Supercontig_1.2	264501	34.258	0.7661	-0.384395
Supercontig_1.2	265501	35.683	0.798	-0.325539
Supercontig_1.2	266501	39.839	0.8909	-0.166665
Supercontig_1.2	267501	34.077	0.7621	-0.391948
Supercontig_1.2	268501	31.832	0.7119	-0.490253
Supercontig_1.2	269501	34.425	0.7699	-0.377257
Supercontig_1.2	270501	32.481	0.7264	-0.461164
Supercontig_1.2	271501	29.666	0.6634	-0.592049
Supercontig_1.2	272501	25.628	0.5731	-0.803141
Supercontig_1.2	273501	34.871	0.7798	-0.358824
Supercontig_1.2	274501	30.459	0.6812	-0.55385
Supercontig_1.2	275501	32.498	0.7268	-0.46037
Supercontig_1.2	276501	31.517	0.7048	-0.504714
Supercontig_1.2	277501	36.242	0.8105	-0.303116
Supercontig_1.2	278501	34.855	0.7795	-0.359379
Supercontig_1.2	279501	26.903	0.6016	-0.733124
Supercontig_1.2	280501	29.594	0.6618	-0.595533
Supercontig_1.2	281501	29.922	0.6692	-0.579491
Supercontig_1.2	282501	29.665	0.6634	-0.592049
Supercontig_1.2	283501	24.69	0.5521	-0.856998
Supercontig_1.2	284501	27.595	0.6171	-0.696424
Supercontig_1.2	285501	31.896	0.7133	-0.487419
Supercontig_1.2	286501	27.481	0.6146	-0.70228
Supercontig_1.2	287501	34.771	0.7776	-0.3629
Supercontig_1.2	288501	37.63	0.8415	-0.248965
Supercontig_1.2	289501	30.444	0.6808	-0.554697
Supercontig_1.2	290501	39.865	0.8915	-0.165693
Supercontig_1.2	291501	29.107	0.6509	-0.619492
Supercontig_1.2	292501	31.376	0.7017	-0.511074
Supercontig_1.2	293501	29.55	0.6608	-0.597714
Supercontig_1.2	294501	31.467	0.7037	-0.506968
Supercontig_1.2	295501	40.14	0.8977	-0.155695
Supercontig_1.2	296501	30.466	0.6813	-0.553638
Supercontig_1.2	297501	20.695	0.4628	-1.11154
Supercontig_1.2	298501	30.115	0.6735	-0.57025
Supercontig_1.2	299501	32.836	0.7343	-0.445558
Supercontig_1.2	300501	29.27	0.6546	-0.611314
Supercontig_1.2	301501	31.131	0.6962	-0.522426
Supercontig_1.2	302501	23.602	0.5278	-0.921937
Supercontig_1.2	303501	32.273	0.7217	-0.470529
Supercontig_1.2	304501	35.792	0.8004	-0.321207
Supercontig_1.2	305501	30.363	0.679	-0.558517
Supercontig_1.2	306501	30.336	0.6784	-0.559792
Supercontig_1.2	307501	30.625	0.6849	-0.546035
Supercontig_1.2	308501	31.928	0.714	-0.486004
Supercontig_1.2	309501	35.827	0.8012	-0.319766
Supercontig_1.2	310501	28.833	0.6448	-0.633076
Supercontig_1.2	311501	31.71	0.7091	-0.495939
Supercontig_1.2	312501	28.556	0.6386	-0.647016
Supercontig_1.2	313501	37.429	0.837	-0.2567
Supercontig_1.2	314501	33.018	0.7384	-0.437526
Supercontig_1.2	315501	35.904	0.8029	-0.316708
Supercontig_1.2	316501	32.236	0.7209	-0.472129
Supercontig_1.2	317501	23.274	0.5205	-0.94203
Supercontig_1.2	318501	30.197	0.6753	-0.5664
Supercontig_1.2	319501	33.188	0.7422	-0.43012
Supercontig_1.2	320501	30.088	0.6729	-0.571536
Supercontig_1.2	321501	31.617	0.7071	-0.500014
Supercontig_1.2	322501	28.266	0.6321	-0.661775
Supercontig_1.2	323501	41.454	0.927	-0.109359
Supercontig_1.2	324501	40.365	0.9027	-0.147681
Supercontig_1.2	325501	33.778	0.7554	-0.404687
Supercontig_1.2	326501	29.025	0.6491	-0.623487
Supercontig_1.2	327501	28.751	0.643	-0.637109
Supercontig_1.2	328501	26.081	0.5833	-0.77769
Supercontig_1.2	329501	32.391	0.7244	-0.465142
Supercontig_1.2	330501	31.521	0.7049	-0.504509
Supercontig_1.2	331501	30.481	0.6817	-0.552791
Supercontig_1.2	332501	31.151	0.6966	-0.521598
Supercontig_1.2	333501	37.29	0.8339	-0.262054
Supercontig_1.2	334501	29.741	0.6651	-0.588357
Supercontig_1.2	335501	35.067	0.7842	-0.350706
Supercontig_1.2	336501	32.386	0.7243	-0.465341
Supercontig_1.2	337501	26.05	0.5826	-0.779422
Supercontig_1.2	338501	33.554	0.7504	-0.414268
Supercontig_1.2	339501	26.741	0.598	-0.741783
Supercontig_1.2	340501	20.108	0.4497	-1.15297
Supercontig_1.2	341501	30.309	0.6778	-0.561068
Supercontig_1.2	342501	28.82	0.6445	-0.633748
Supercontig_1.2	343501	34.455	0.7705	-0.376133
Supercontig_1.2	344501	29.719	0.6646	-0.589442
Supercontig_1.2	345501	31.499	0.7044	-0.505533
Supercontig_1.2	346501	38.638	0.8641	-0.21073
Supercontig_1.2	347501	36.455	0.8153	-0.294597
Supercontig_1.2	348501	27.487	0.6147	-0.702046
Supercontig_1.2	349501	27.199	0.6083	-0.717145
Supercontig_1.2	350501	26.034	0.5822	-0.780413
Supercontig_1.2	351501	27.204	0.6084	-0.716908
Supercontig_1.2	352501	32.753	0.7325	-0.449099
Supercontig_1.2	353501	34.245	0.7658	-0.38496
Supercontig_1.2	354501	28.172	0.63	-0.666576
Supercontig_1.2	355501	32.182	0.7197	-0.474532
Supercontig_1.2	356501	33.232	0.7432	-0.428178
Supercontig_1.2	357501	31.652	0.7078	-0.498586
Supercontig_1.2	358501	37.785	0.845	-0.242977
Supercontig_1.2	359501	25.402	0.5681	-0.815783
Supercontig_1.2	360501	26.467	0.5919	-0.756575
Supercontig_1.2	361501	31.549	0.7055	-0.503282
Supercontig_1.2	362501	31.297	0.6999	-0.514779
Supercontig_1.2	363501	27.113	0.6063	-0.721896
Supercontig_1.2	364501	31.315	0.7003	-0.513955
Supercontig_1.2	365501	26.73	0.5978	-0.742265
Supercontig_1.2	366501	28.59	0.6394	-0.645209
Supercontig_1.2	367501	31.679	0.7084	-0.497364
Supercontig_1.2	368501	33.878	0.7576	-0.400492
Supercontig_1.2	369501	21.38	0.4781	-1.06462
Supercontig_1.2	370501	26.374	0.5898	-0.761702
Supercontig_1.2	371501	29.523	0.6602	-0.599025
Supercontig_1.2	372501	28.606	0.6397	-0.644533
Supercontig_1.2	373501	24.662	0.5515	-0.858567
Supercontig_1.2	374501	30.473	0.6815	-0.553214
Supercontig_1.2	375501	28.157	0.6297	-0.667263
Supercontig_1.2	376501	33.928	0.7587	-0.398399
Supercontig_1.2	377501	36.302	0.8118	-0.300804
Supercontig_1.2	378501	32.515	0.7271	-0.459774
Supercontig_1.2	379501	30.02	0.6713	-0.57497
Supercontig_1.2	380501	29.89	0.6684	-0.581216
Supercontig_1.2	381501	34.605	0.7739	-0.369781
Supercontig_1.2	382501	32.01	0.7158	-0.482372
Supercontig_1.2	383501	28.975	0.648	-0.625934
Supercontig_1.2	384501	25.294	0.5657	-0.821891
Supercontig_1.2	385501	33.737	0.7545	-0.406407
Supercontig_1.2	386501	25.004	0.5592	-0.838564
Supercontig_1.2	387501	36.954	0.8264	-0.275088
Supercontig_1.2	388501	26.319	0.5886	-0.764641
Supercontig_1.2	389501	35.782	0.8002	-0.321567
Supercontig_1.2	390501	36.022	0.8056	-0.311864
Supercontig_1.2	391501	36.901	0.8252	-0.277184
Supercontig_1.2	392501	30.631	0.685	-0.545824
Supercontig_1.2	393501	42.611	0.9529	-0.0696033
Supercontig_1.2	394501	33.224	0.743	-0.428566
Supercontig_1.2	395501	27.95	0.6251	-0.677841
Supercontig_1.2	396501	30.957	0.6923	-0.530531
Supercontig_1.2	397501	34.293	0.7669	-0.38289
Supercontig_1.2	398501	32.468	0.7261	-0.46176
Supercontig_1.2	399501	32.292	0.7222	-0.46953
Supercontig_1.2	400501	29.274	0.6547	-0.611094
Supercontig_1.2	401501	35.2	0.7872	-0.345198
Supercontig_1.2	402501	32.628	0.7297	-0.454625
Supercontig_1.2	403501	33.247	0.7435	-0.427595
Supercontig_1.2	404501	29.438	0.6583	-0.603183
Supercontig_1.2	405501	26.778	0.5988	-0.739854
Supercontig_1.2	406501	39.503	0.8834	-0.178861
Supercontig_1.2	407501	27.651	0.6184	-0.693388
Supercontig_1.2	408501	30.587	0.684	-0.547932
Supercontig_1.2	409501	27.55	0.6161	-0.698764
Supercontig_1.2	410501	24.749	0.5535	-0.853345
Supercontig_1.2	411501	32.634	0.7298	-0.454427
Supercontig_1.2	412501	31.004	0.6933	-0.528448
Supercontig_1.2	413501	37.724	0.8436	-0.245369
Supercontig_1.2	414501	24.984	0.5587	-0.839854
Supercontig_1.2	415501	33.63	0.7521	-0.411004
Supercontig_1.2	416501	33.588	0.7511	-0.412923
Supercontig_1.2	417501	25.684	0.5744	-0.799872
Supercontig_1.2	418501	37.772	0.8447	-0.243489
Supercontig_1.2	419501	36.513	0.8165	-0.292475
Supercontig_1.2	420501	36.682	0.8203	-0.285776
Supercontig_1.2	421501	27.111	0.6063	-0.721896
Supercontig_1.2	422501	36.916	0.8256	-0.276485
Supercontig_1.2	423501	32.863	0.7349	-0.44438
Supercontig_1.2	424501	39.662	0.887	-0.172994
Supercontig_1.2	425501	33.921	0.7586	-0.398589
Supercontig_1.2	426501	25.653	0.5737	-0.801632
Supercontig_1.2	427501	31.117	0.6959	-0.523048
Supercontig_1.2	428501	33.532	0.7499	-0.41523
Supercontig_1.2	429501	33.986	0.76	-0.395929
Supercontig_1.2	430501	32.268	0.7216	-0.470729
Supercontig_1.2	431501	33.123	0.7407	-0.433039
Supercontig_1.2	432501	29.618	0.6624	-0.594225
Supercontig_1.2	433501	28.45	0.6362	-0.652448
Supercontig_1.2	434501	28.853	0.6452	-0.632182
Supercontig_1.2	435501	29.053	0.6497	-0.622154
Supercontig_1.2	436501	27.742	0.6204	-0.688729
Supercontig_1.2	437501	22.501	0.5032	-0.990796
Supercontig_1.2	438501	30.278	0.6771	-0.562559
Supercontig_1.2	439501	23.226	0.5194	-0.945082
Supercontig_1.2	440501	31.678	0.7084	-0.497364
Supercontig_1.2	441501	27.657	0.6185	-0.693154
Supercontig_1.2	442501	28.436	0.6359	-0.653128
Supercontig_1.2	443501	29.332	0.656	-0.608232
Supercontig_1.2	444501	36.591	0.8183	-0.289298
Supercontig_1.2	445501	43.215	0.9664	-0.0493076
Supercontig_1.2	446501	30.102	0.6732	-0.570893
Supercontig_1.2	447501	33.507	0.7493	-0.416385
Supercontig_1.2	448501	27.639	0.6181	-0.694088
Supercontig_1.2	449501	30.742	0.6875	-0.540568
Supercontig_1.2	450501	29.745	0.6652	-0.58814
Supercontig_1.2	451501	31.648	0.7078	-0.498586
Supercontig_1.2	452501	29.422	0.658	-0.603841
Supercontig_1.2	453501	31.119	0.6959	-0.523048
Supercontig_1.2	454501	34.103	0.7627	-0.390812
Supercontig_1.2	455501	30.752	0.6877	-0.540149
Supercontig_1.2	456501	34.483	0.7711	-0.37501
Supercontig_1.2	457501	30.034	0.6717	-0.574111
Supercontig_1.2	458501	37.758	0.8444	-0.244002
Supercontig_1.2	459501	19.659	0.4396	-1.18574
Supercontig_1.2	460501	29.262	0.6544	-0.611755
Supercontig_1.2	461501	33.329	0.7453	-0.424107
Supercontig_1.2	462501	33.339	0.7456	-0.423526
Supercontig_1.2	463501	27.396	0.6127	-0.706747
Supercontig_1.2	464501	32.727	0.7319	-0.450282
Supercontig_1.2	465501	29.172	0.6524	-0.616171
Supercontig_1.2	466501	29.181	0.6526	-0.615729
Supercontig_1.2	467501	30.708	0.6867	-0.542248
Supercontig_1.2	468501	27.51	0.6152	-0.700873
Supercontig_1.2	469501	27.998	0.6261	-0.675535
Supercontig_1.2	470501	32.447	0.7256	-0.462754
Supercontig_1.2	471501	37.393	0.8362	-0.25808
Supercontig_1.2	472501	29.345	0.6562	-0.607793
Supercontig_1.2	473501	31.616	0.707	-0.500218
Supercontig_1.2	474501	27.452	0.6139	-0.703924
Supercontig_1.2	475501	29.136	0.6516	-0.617941
Supercontig_1.2	476501	32.905	0.7359	-0.442418
Supercontig_1.2	477501	26.51	0.5928	-0.754383
Supercontig_1.2	478501	31.932	0.7141	-0.485802
Supercontig_1.2	479501	33.169	0.7418	-0.430898
Supercontig_1.2	480501	32.348	0.7234	-0.467134
Supercontig_1.2	481501	35.793	0.8004	-0.321207
Supercontig_1.2	482501	29.681	0.6638	-0.591179
Supercontig_1.2	483501	31.472	0.7038	-0.506763
Supercontig_1.2	484501	28.898	0.6463	-0.629724
Supercontig_1.2	485501	30.318	0.678	-0.560643
Supercontig_1.2	486501	30.146	0.6742	-0.568751
Supercontig_1.2	487501	30.798	0.6887	-0.538052
Supercontig_1.2	488501	30.847	0.6898	-0.53575
Supercontig_1.2	489501	33.656	0.7527	-0.409853
Supercontig_1.2	490501	30.713	0.6868	-0.542038
Supercontig_1.2	491501	27.744	0.6204	-0.688729
Supercontig_1.2	492501	35.465	0.7931	-0.334425
Supercontig_1.2	493501	30.127	0.6737	-0.569822
Supercontig_1.2	494501	32.539	0.7277	-0.458584
Supercontig_1.2	495501	29.728	0.6648	-0.589008
Supercontig_1.2	496501	19.158	0.4284	-1.22297
Supercontig_1.2	497501	35.29	0.7892	-0.341537
Supercontig_1.2	498501	29.973	0.6703	-0.577121
Supercontig_1.2	499501	30.724	0.6871	-0.541408
Supercontig_1.2	500501	36.59	0.8183	-0.289298
Supercontig_1.2	501501	31.394	0.7021	-0.510252
Supercontig_1.2	502501	28.779	0.6436	-0.635764
Supercontig_1.2	503501	28.927	0.6469	-0.628385
Supercontig_1.2	504501	33.806	0.756	-0.403542
Supercontig_1.2	505501	31.727	0.7095	-0.495125
Supercontig_1.2	506501	33.671	0.753	-0.409278
Supercontig_1.2	507501	33.513	0.7495	-0.416
Supercontig_1.2	508501	33.679	0.7532	-0.408895
Supercontig_1.2	509501	31.531	0.7051	-0.5041
Supercontig_1.2	510501	31.56	0.7058	-0.502669
Supercontig_1.2	511501	30.612	0.6846	-0.546667
Supercontig_1.2	512501	41.003	0.917	-0.125006
Supercontig_1.2	513501	24.266	0.5427	-0.881773
Supercontig_1.2	514501	24.774	0.554	-0.852042
Supercontig_1.2	515501	31.704	0.709	-0.496142
Supercontig_1.2	516501	30.356	0.6789	-0.558729
Supercontig_1.2	517501	25.06	0.5604	-0.835471
Supercontig_1.2	518501	24.799	0.5546	-0.85048
Supercontig_1.2	519501	29.665	0.6634	-0.592049
Supercontig_1.2	520501	32.704	0.7314	-0.451267
Supercontig_1.2	521501	27.887	0.6236	-0.681307
Supercontig_1.2	522501	31.782	0.7107	-0.492687
Supercontig_1.2	523501	35.991	0.8049	-0.313119
Supercontig_1.2	524501	33.239	0.7433	-0.427983
Supercontig_1.2	525501	33.33	0.7454	-0.423913
Supercontig_1.2	526501	31.416	0.7026	-0.509225
Supercontig_1.2	527501	30.63	0.685	-0.545824
Supercontig_1.2	528501	38.634	0.864	-0.210897
[truncated: 10,233 more rows]

## Sheet: S8D
	death rate	death rate 2*SD	release rate	release rate 2*sd	consumption	consumption2*sd
	(/hr)	(/hr)	fmole/hr	fmole Lys/cell/hr	fmole Hyp/new cell	fmole Hyp/new cell
anc	0.00814	9.82e-05	0.46	0.03	2.47	0.28
anc	0.011	0.00012	0.59	0.04	2.47	0.21
anc	0.012	0.000369	0.58	0.05	2.51	0.25
anc	0.0167	0.00041	0.75	0.05	2.53	0.28
anc:evo~1:1	0.00818	0.000184	0.47	0.04	1.95	0.16
anc:evo~1:1	0.00559	0.000193	0.33	0.02	1.99	0.21
evo	0.000713	1.57e-05	0.16	0.01	1.57	0.22
evo	0.000936	8.68e-06	0.17	0.01	1.57	0.39
