# Supplementary material for: Uncovering and resolving challenges of quantitative modeling in a simplified community of interacting cells
Source: PLoS Biol. 2019 Feb 22;17(2):e3000135. doi: 10.1371/journal.pbio.3000135 (PMC6402699; doi:10.1371/journal.pbio.3000135)
Supplement: S15 Data — (XLSX) [file pbio.3000135.s057.xlsx]

## Sheet: S9A
Date	Assay	Conditions	pre-conditioning	Time	Evolved	Screened	Percent Evolved	evo:anc ratio	Calc error
				hr	n	n
2017-11-15	Batch	Colony	YPD plate	-20	2	141	0.0141844	0.0143885	0.0200598
2017-11-15	Batch	Exponential	YPD plate ->SD+100uM Hyp	0	4	142	0.028169	0.0289855	0.028169
2017-10-30	Batch	Exponential	SD+100uM Hyp	0	15	188	0.0797872	0.0867052	0.041202
2017-10-30	Batch	Colony	YPD plate	-19	5	190	0.0263158	0.027027	0.0235376
2017-10-09	Batch	Exponential		0	11	188	0.0585106	0.0621469	0.0352832
2017-10-09	Batch	Starved		10	8	190	0.0421053	0.043956	0.0297729
2017-10-09	Batch	Starved		24	9	191	0.0471204	0.0494505	0.0314136
2017-06-06	Batch	Starved		24	33	276	0.119565	0.135802	0.0416273
2017-06-06	Batch	Starved		48	21	184	0.11413	0.128834	0.0498106
2017-06-06	Batch	Starved		70	17	183	0.0928962	0.10241	0.0450613
2017-02-14	Batch	Starved		96	1	32	0.03125	0.0322581	0.0625
2017-01-25	Batch	Exponential		0	0	88	0	0	0.0393648

## Sheet: S9B
Date	Assay	Conditions	pre-conditioning	Time (hr)	Method	Evolved	Screened	Percent Evolved		evo:anc ratio	Notes
2017-11-15	Batch	Colony	YPD plate	48	High-Throughput	2	141	0.0141844		0.0143885	A, brown circle
2017-11-15	Batch	Colony	SD+ade plate	48	High-Throughput	0	141	0		0	A, brown square
						3	141	0.0212766	0.0245681
2017-11-15	Batch	Exponential	YPD plate ->SD+100uM Hyp	20	High-Throughput	4	142	0.028169		0.0289855	A, brown circle
2017-11-15	Batch	Exponential	SD+ade plate ->SD+100uM Hyp	20	High-Throughput	1	143	0.00699301		0.00704225	A, brown square
2017-10-30	Batch	Exponential	SD+100uM Hyp	19	High-Throughput	15	188	0.0797872		0.0867052	A, blue
2017-10-30	Batch	Colony	YPD plate	69	High-Throughput	5	190	0.0263158		0.027027	A, blue
2017-10-30	Batch	SMALL Exponential	SD+100uM Hyp	19	High-Throughput	48	48	1		#DIV/0!
2017-10-30	Batch	SMALL Colony	YPD plate	69	High-Throughput	48	48	1		#DIV/0!
2017-10-13	CoSMO	Well-mixed	24hr starve	27	High-Throughput	7	84	0.0833333	0.0629941	0.0909091	B, x
2017-10-13	CoSMO	Well-mixed	24hr starve	45	High-Throughput	15	96	0.15625	0.0806872	0.185185	B, x
2017-10-13	CoSMO	Well-mixed	24hr starve	68	High-Throughput	14	96	0.145833	0.0779512	0.170732	B, x
2017-10-09	Batch	Exponential		0	High-Throughput	11	188	0.0585106		0.0621469	A
2017-10-09	Batch	Starved		10	High-Throughput	8	190	0.0421053		0.043956	A
2017-10-09	Batch	Starved		24	High-Throughput	9	191	0.0471204		0.0494505	A
2017-03-28	CoSMO	Spatial	24hr starve	96	High-Throughput	31	88	0.352273	0.12654	0.54386	B, *
2016-09-13	CoSMO	Well-mixed	10hr chemostat	23	YPD growth low	2	39	0.0512821		0.0540541	Did not do full assay
2016-09-13	CoSMO	Well-mixed	10hr chemostat	38	YPD growth low	24	53	0.45283		0.827586	Did not do full assay
2017-06-06	Batch	Starved		24	High-Throughput	33	276	0.119565		0.135802	A
2017-06-06	Batch	Starved		48	High-Throughput	21	184	0.11413		0.128834	A
2017-06-06	Batch	Starved		70	High-Throughput	17	183	0.0928962		0.10241	A
2017-07-19	Chemostat	6hr DT	24hr starve	54	High-Throughput	24	95	0.252632	0.103136	0.338028	B,down triangle
2017-07-19	Chemostat	7hr DT	24hr starve	54	High-Throughput	39	93	0.419355	0.134301	0.722222	B, diamond
2017-02-28	Chemostat	8hr DT	24hr starve	22	High-Throughput	16	87	0.183908		0.225352	B, upper triangle
2017-02-28	Chemostat	8hr DT	24hr starve	45	High-Throughput	13	87	0.149425		0.175676	B, upper triangle
2017-02-28	Chemostat	8hr DT	24hr starve	71	High-Throughput	31	87	0.356322		0.553571	B, upper triangle
2017-02-14	Chemostat	8hr DT	24hr starve	24	High-Throughput	8	88	0.0909091		0.1	B, upper triangle
2017-02-14	Chemostat	8hr DT	24hr starve	48	High-Throughput	17	88	0.193182		0.239437	B, upper triangle
2017-02-14	Chemostat	8hr DT	24hr starve	72	High-Throughput	26	87	0.298851		0.42623	B, upper triangle
2017-02-14	Chemostat	4hr DT	24hr starve	72	High-Throughput	0	32	0	0.125	0	B, square
						4	32	0.125			0.125
2017-02-14	Batch	Starved		96	High-Throughput	1	32	0.03125		0.0322581	A
2017-01-25	Batch	Exponential		0	High-Throughput	0	88	0		0	B, filled upper triangle
2017-01-25	Chemostat	8hr DT	no starve	12	High-Throughput	3	88	0.0340909		0.0352941	B, filled upper triangle
2017-01-25	Chemostat	8hr DT	no starve	24	High-Throughput	0	44	0		0	B, filled upper triangle
2017-01-25	Chemostat	8hr DT	no starve	48	High-Throughput	2	44	0.0454545		0.047619	B, filled upper triangle
2017-01-25	Chemostat	8hr DT	no starve	72	High-Throughput	9	88	0.102273		0.113924	B, filled upper triangle
2017-01-25	Chemostat	8hr DT	no starve	96	High-Throughput	21	56	0.375		0.6	B, filled upper triangle
2017-01-25	Chemostat	8hr DT	24hr starve	24	High-Throughput	7	44	0.159091		0.189189	B, upper triangle
2017-01-25	Chemostat	8hr DT	24hr starve	70	High-Throughput	5	44	0.113636		0.128205	B, upper triangle
2017-01-25	Chemostat	8hr DT	24hr starve	94	High-Throughput	12	32	0.375		0.6	B, upper triangle
2017-01-11	Chemostat	8hr DT	no starve	30	High-Throughput	3	88	0.0340909		0.0352941	B, filled upper triangle
2017-01-11	Chemostat	8hr DT	no starve	50	High-Throughput	16	86	0.186047		0.228571	B, filled upper triangle
2016-10-11	Chemostat	8hr DT	no starve	42	High-Throughput	8	47	0.170213		0.205128	B, filled upper triangle
2016-10-11	Chemostat	8hr DT	no starve	49	High-Throughput	7	45	0.155556		0.184211	B, filled upper triangle
2016-10-11	Chemostat	8hr DT	no starve	67	0.4uM Hyp GR	16	48	0.333333		0.5	B, filled upper triangle
