# Supplementary material for: Uncovering and resolving challenges of quantitative modeling in a simplified community of interacting cells
Source: PLoS Biol. 2019 Feb 22;17(2):e3000135. doi: 10.1371/journal.pbio.3000135 (PMC6402699; doi:10.1371/journal.pbio.3000135)
Supplement: S16 Data — (XLSX) [file pbio.3000135.s058.xlsx]

## Sheet: S10A
	anc (1340)	anc (1340)	evo (2447)	evo (2447)
hyp	growth rate	2*stdev	growth rate	2*stdev
uM	(/hr)	(/hr)	(/hr)	(/hr)
0	0.018417	0.00169227	0.01	0.003
0.1	0.0357087	0.00326679	0.023	0.005
0.2	0.0466264	0.0029415	0.042	0.008
0.4	0.0665083	0.0436418	0.111	0.007
0.6	0.106825	0.0195846	0.172	0.01
1	0.177593	0.0163999	0.203	0.007
2	0.283018	0.0322919	0.224	0.004
5	0.377356	0.0359707	0.235	0.003
20	0.42521	0.0169851	0.234	0.002

## Sheet: S10B
replicate	time (hr)	Fraction evolved	sampling error (-)	sampling error (+)
rep1	0	0.014	0.021	0.021
rep1	14	0.029	0.031	0.031
rep2	0	0.027	0.024	0.025
rep2	12.55	0.087	0.047	0.051

## Sheet: S10C
starting ratio:	1:1000 ratio rep1	1:1000 ratio rep1	1:1000 ratio rep2	1:1000 ratio rep2	1:1 ratio rep1	1:1 ratio rep1	1:1 ratio rep2	1:1 ratio rep2
time	anc cell dens	evo cell dens	anc cell dens	evo cell dens	anc cell dens	evo cell dens	anc cell dens	evo cell dens
hr	cells/mL	cells/mL	cells/mL	cells/mL	cells/mL	cells/mL	cells/mL	cells/mL
0	1400000	1500	1400000	1500	670000	840000	670000	840000
6.25	5800000	3400	5500000	2400	3000000	1700000	3000000	1700000
11.25	7400000	4600	7900000	3800	5000000	2900000	5100000	2800000
21.25	7300000	6000	7200000	5400	5600000	4100000	5600000	4000000
26	7800000	5300	7400000	5700	5800000	4600000	5800000	4600000
29.5	7300000	7100	6800000	5300	5200000	4600000	5000000	4500000
49.3	6400000	7700	5900000	7600	4000000	4800000	4000000	5000000
