# Supplementary material for: Uncovering and resolving challenges of quantitative modeling in a simplified community of interacting cells
Source: PLoS Biol. 2019 Feb 22;17(2):e3000135. doi: 10.1371/journal.pbio.3000135 (PMC6402699; doi:10.1371/journal.pbio.3000135)
Supplement: S17 Data — (XLSX) [file pbio.3000135.s059.xlsx]

## Sheet: Sheet1
Date	replicate	Time	consumption	death rate	Release rate	Fraction Evolved
		hr	fmole hyp per new cell	(/hr)	fmole/cell/hr
2017-02-28	1	71	2.54376	0.0150736	0.63019	0.356322
2017-02-14	1	72	3.06876	0.0137397	0.762178	0.298851
2017-02-14	2	72	3.35495	0.0169265	1.19335	0.208333
2017-01-25	4	70	2.52438	0.00948424	0.407721	0.113636
2017-01-25	4	94	2.21385	0.00936497	0.442155	0.375
2017-01-25	1	48	2.39859	0.0103721	0.387427	0.0454545
2017-01-25	1	72	2.51847	0.0146823	0.729808	0.113636
2017-01-25	1	96	2.2286	0.0141448	0.602685	0.321429
2017-01-11	1	50	2.46861	0.00814225	0.456771	0.214286
2017-01-11	2	50	2.46984	0.0110498	0.586878	0.159091
2016-10-11	1	49	2.88343	0.00693313	0.364263	0.217391
2016-10-11	1	67	2.85054	0.0084901	0.551964	0.333333
2016-10-11	2	49	2.55849	0.0102859	0.440442	0.0909091
2016-10-11	2	67	2.60091	0.0115377	0.58264	0.333333
