# Supplementary material for: Uncovering and resolving challenges of quantitative modeling in a simplified community of interacting cells
Source: PLoS Biol. 2019 Feb 22;17(2):e3000135. doi: 10.1371/journal.pbio.3000135 (PMC6402699; doi:10.1371/journal.pbio.3000135)
Supplement: S18 Data — (XLSX) [file pbio.3000135.s060.xlsx]

## Sheet: Sheet1
time	Dead cell density	Live cell density	Hypoxanthine	Lysine
hr	cells/mL	cells/mL	uM	uM
0	30000	1400000	0	14.7368
6	47000	4000000	4.1	1.19212
12.3	120000	3100000	8.5	1.78276
22	50000	3300000	10.5	0.856158
26	60000	4000000	10.7	0.639409
