# Supplementary material for: Uncovering and resolving challenges of quantitative modeling in a simplified community of interacting cells
Source: PLoS Biol. 2019 Feb 22;17(2):e3000135. doi: 10.1371/journal.pbio.3000135 (PMC6402699; doi:10.1371/journal.pbio.3000135)
Supplement: S19 Data — (XLSX) [file pbio.3000135.s061.xlsx]

## Sheet: Sheet1
Int(Nlive*e^(dil*t))	NDead*e^(dil*t)	Hyp*e^(dil*t)
cells/mL*hr	cells/mL	uM
0	3600	0
58000000	270000	24
150000000	560000	68
200000000	610000	99
280000000	900000	120
390000000	1200000	160
