# Supplementary material for: Uncovering and resolving challenges of quantitative modeling in a simplified community of interacting cells
Source: PLoS Biol. 2019 Feb 22;17(2):e3000135. doi: 10.1371/journal.pbio.3000135 (PMC6402699; doi:10.1371/journal.pbio.3000135)
Supplement: S20 Data — (XLSX) [file pbio.3000135.s062.xlsx]

## Sheet: S15A-C
time	Total Cells	Dead Cells	Live Cells	Total 2SD	Dead 2SD	Live 2SD	Extracellular Lysine	Extracellular Lysine, 2SD	exp(dil*t)
hr	cells/mL	cells/mL	cells/mL	cells/mL	cells/mL	cells/mL	uM	uM
0	2700000	6800	2700000	130000	900	120000	0	0	0
24	7000000	350000	6700000	460000	21000	430000	42.7	1.3	112000000
34	6100000	490000	5600000	1600000	110000	1500000	73.9	5.2	174000000
48	7200000	1200000	6000000	1100000	120000	960000	113.4	6.2	255000000
72	7300000	3000000	4300000	630000	270000	460000	203.2	15.1	378000000
82	7500000	4000000	3600000	930000	470000	460000	235.4	10.4	418000000
96	7900000	5400000	2400000	620000	340000	310000	310.7	18.1	460000000
168	7100000	6700000	450000	120000	150000	22000	384.1	15.7	564000000

## Sheet: S15D-F
Time	Total Cells	Dead Cells	Live Cells	Total 2SD	Dead 2SD	Live 2SD	Extracellular Lysine	Extracellular Lysine, 2SD	exp(dil*t)	dead*e(dil*t)	Live*e(dil*t)	Int(Live*e(dil*t))	Lys*e(dil*t)
hr	cells/mL	cells/mL	cells/mL	cells/mL	cells/mL	cells/mL	uM	uM		cells/mL	cells/mL	cells/mL/hr	uM
0	3500000	120000	3400000	430000	8900	430000	21.4	1.3	1	122000	3390000	0	21.4168
10	2400000	280000	2200000	370000	25000	360000	9.1	0.9	2.38	669000	5120000	42500000	21.7336
24	6400000	580000	5800000	440000	27000	410000	17	1.3	8	4600000	46700000	406000000	135.925
48	6300000	960000	5300000	660000	86000	570000	48.7	3.5	64	61500000	341000000	5050000000	3116.01
58	6400000	970000	5400000	350000	20000	330000	49.3	8.7	152.22	148000000	823000000	10900000000	7505.67
72	7100000	1000000	6000000	460000	54000	410000	55.5	4.8	512	525000000	3090000000	38300000000	28430.3
