# Supplementary material for: Uncovering and resolving challenges of quantitative modeling in a simplified community of interacting cells
Source: PLoS Biol. 2019 Feb 22;17(2):e3000135. doi: 10.1371/journal.pbio.3000135 (PMC6402699; doi:10.1371/journal.pbio.3000135)
Supplement: S21 Data — (XLSX) [file pbio.3000135.s063.xlsx]

## Sheet: S16A
Time	rep1 intracellular lysine	rep2 intracellular lysine	rep3 intracellular lysine
hr	fmole/cell	fmole/cell	fmole/cell
0	2.87	2.87	2.87
24	19.76	19.76	19.76
34	63.85	58.4	40.39
48	40.82	39.99	36.71
72	52.03	55.22	50.31
82	51.05	61.41	49.55
96	42.8	53.89	45.48
predicted intracellular lysine for dead release model to be correct (fmole/cell)
	51.9	63.4	58.2

## Sheet: S16B
Time	rep1 intracellular lysine	rep2 intracellular lysine	rep3 intracellular lysine	rep1 intracellular lysine	rep2 intracellular lysine	rep3 intracellular lysine
hr	fmole/cell	fmole/cell	fmole/cell	fmole/cell	fmole/cell	fmole/cell
	measured	measured	measured	predicted intracellular lysine for dead release model to be correct (fmole/cell)
0	2.87	2.87	2.87
24	17.74	19.98	18.79	121.7	99.8	116
34	30.74	21.5	27.35	143.7	121.3	116.6
48	20.38	27.73	33.08	96.6	115.1	102.2
72	29.78	24.87	35.7	70.3	65.1	65.6
82	30.69	35.43	32.87	61.5	63.3	58.8
96	39.26	31.95	24.02	57	53	46.3
