# Supplementary material for: Uncovering and resolving challenges of quantitative modeling in a simplified community of interacting cells
Source: PLoS Biol. 2019 Feb 22;17(2):e3000135. doi: 10.1371/journal.pbio.3000135 (PMC6402699; doi:10.1371/journal.pbio.3000135)
Supplement: S22 Data — (XLSX) [file pbio.3000135.s064.xlsx]

## Sheet: exponential
Volume	Fraction	Fraction	Fraction
	rep_1	rep_2	rep_3
0	0	0	0
1.10201	0	0	0
2.204	0	0	0
3.30702	0	0	0
4.40901	0	0	0
5.51099	0	0	0
6.61305	0	0	0
7.71503	0	0	0
8.81702	0	0	0
9.92	-0.000960546	0.000872977	0.00188131
11.0201	-0.000960546	0.000668204	0.00155635
12.12	-0.000384218	0.000463432	0.00172738
13.2301	0.000504286	0.000732869	0.00167607
14.3301	-0.000288164	0.000269437	0.00129981
15.4301	0	0.000452654	0.0012485
16.5301	-4.80273e-05	0.0004311	0.000803831
17.63	0.000408232	0.000926864	0.00147084
18.7401	0.000384218	0.000829867	0.00133402
19.8401	9.60546e-05	0.000916086	0.00109458
20.9401	0.000576327	0.000926864	0.00112878
22.0401	0.000600341	0.00151963	0.00167607
23.15	0.000960546	0.00220938	0.00148794
24.25	0.0012247	0.00338413	0.00177869
25.35	0.00213721	0.00382601	0.00251411
26.4502	0.00244939	0.00556118	0.00389944
27.5501	0.00461062	0.00788912	0.00535317
28.66	0.00487477	0.00949497	0.00622541
29.7601	0.0075643	0.0126097	0.00692663
30.8601	0.00977355	0.0140431	0.00887635
31.9601	0.0121749	0.0153256	0.0118864
33.07	0.0119828	0.0174272	0.0129981
34.1701	0.0154888	0.0176212	0.014982
35.27	0.0149125	0.0195288	0.0152728
36.37	0.0148885	0.0197659	0.0179066
37.47	0.0190188	0.0183325	0.0185223
38.5801	0.0173859	0.0175134	0.0189499
39.68	0.0195231	0.0199276	0.02013
40.7801	0.0179862	0.0187205	0.0169147
41.8801	0.0185145	0.0185588	0.0174448
42.99	0.0180342	0.0179445	0.0193946
44.0901	0.0187547	0.0183756	0.0185565
45.19	0.019403	0.016856	0.0175988
46.29	0.0186586	0.0179553	0.016966
47.39	0.0178181	0.0184834	0.0176501
48.5002	0.0204116	0.0186774	0.0164358
49.6001	0.0178661	0.0176212	0.0173593
50.7	0.0189227	0.0176966	0.0182487
51.8003	0.0183224	0.0192809	0.0176672
52.9	0.0179142	0.0179768	0.0178724
54.0103	0.0196191	0.0173086	0.0193946
55.1101	0.0196672	0.0179876	0.0188986
56.2102	0.0190668	0.0178367	0.0182829
57.3101	0.0190188	0.0173194	0.0173935
58.4203	0.0195711	0.0163171	0.0187789
59.52	0.0182744	0.0173194	0.0184026
60.62	0.0177221	0.0161986	0.0178211
61.7203	0.017578	0.0177182	0.0156319
62.82	0.0163773	0.0170823	0.0145203
63.93	0.0189227	0.0155627	0.015974
65.0303	0.0174819	0.0150777	0.0152557
66.1301	0.0161852	0.0146035	0.0158201
67.2303	0.0180102	0.0147113	0.0153583
68.3402	0.0163773	0.0153687	0.0162134
69.4401	0.0159931	0.0140323	0.0145203
70.5403	0.0135917	0.0141077	0.0158714
71.6403	0.014096	0.0129869	0.0129126
72.7403	0.0135917	0.0124372	0.0137506
73.8502	0.0135437	0.0116505	0.0140585
74.9504	0.0135437	0.0125127	0.0136309
76.0501	0.0112144	0.011769	0.0119891
77.1504	0.0127993	0.00991529	0.0127074
78.2502	0.0110703	0.0104003	0.0106037
79.36	0.0106621	0.0110577	0.0113734
80.4604	0.0110703	0.0096243	0.0111339
81.56	0.00991763	0.00839566	0.0101762
82.6604	0.00953341	0.00912853	0.00971438
83.7702	0.0101338	0.00844955	0.00925261
84.8703	0.00919722	0.00702692	0.00914999
85.97	0.00938933	0.00757657	0.00959466
87.0702	0.00780443	0.00678982	0.00848298
88.1702	0.00902913	0.00763046	0.00810672
89.2799	0.00645967	0.00638027	0.0073713
90.3803	0.0058113	0.00605695	0.00653326
91.48	0.00626756	0.00439722	0.00749102
92.5801	0.00641164	0.00576596	0.00694373
93.6904	0.00521096	0.00523786	0.00588336
94.7901	0.00482674	0.00494687	0.00660168
95.8901	0.00554715	0.00482831	0.00591756
96.99	0.00506688	0.00451577	0.00518214
98.0901	0.0049228	0.00494687	0.00537027
99.2004	0.00427443	0.00394456	0.00391654
100.3	0.00417837	0.004214	0.00372841
101.4	0.00391422	0.00389067	0.00410467
102.5	0.00312177	0.00323325	0.00362579
103.6	0.00362606	0.00330869	0.00391654
104.7	0.00312177	0.00280215	0.00323243
105.8	0.00367409	0.00322247	0.00330084
106.9	0.00259347	0.00289914	0.00348897
108	0.00256946	0.00237105	0.00295878
109.1	0.00312177	0.00240338	0.00280486
110.2	0.00268953	0.00283448	0.00292458
111.3	0.00273756	0.00245727	0.00237729
112.4	0.00292966	0.00240338	0.00196682
113.5	0.00273756	0.00269437	0.00218916
114.6	0.00182504	0.00233871	0.00218916
115.7	0.00242538	0.00223094	0.00237729
116.801	0.00218524	0.00204772	0.00196682
117.901	0.00177701	0.00210161	0.00218916
119	0.00208919	0.00190762	0.00203523
120.1	0.00139279	0.00184295	0.0018471
121.2	0.00184905	0.00146574	0.00157346
122.3	0.0015849	0.00144418	0.0011972
123.4	0.00144082	0.00178906	0.00160766
124.5	0.00184905	0.00140107	0.00153925
125.6	0.00148885	0.00197228	0.0012314
126.8	0.00124871	0.00143341	0.00153925
127.9	0.0015849	0.00117475	0.00135112
129	0.00103259	0.0011963	0.000923551
130.1	0.00108061	0.00167051	0.00150504
131.2	0.00148885	0.00128252	0.00104327
132.3	0.000936532	0.00111008	0.00111168
133.4	0.0015849	0.00148729	0.000838037
134.5	0.00110463	0.00111008	0.000991962
135.6	0.0015849	0.000937641	0.00107748
136.7	0.00124871	0.00122863	0.000991962
137.8	0.00103259	0.00102386	0.000461775
138.901	0.000840477	0.000937641	0.00114589
140	0.00108061	0.00107775	0.000889345
141.1	0.000744423	0.000991529	0.000684112
142.2	0.000840477	0.000948419	0.00107748
143.3	0.00129674	0.000851422	0.000649906
144.4	0.000504286	0.000678982	0.00073542
145.501	0.000696396	0.000646649	0.000581495
146.6	0.000648368	0.000646649	0.000769625
147.7	0.000936532	0.000819089	0.000803831
148.8	0.000696396	0.000872977	0.000838037
149.9	0.000744423	0.000765202	0.000376261
151	0.000936532	0.000700537	0.00042757
152.1	0.000648368	0.000614317	0.000649906
153.201	0.000648368	0.000668204	0.000803831
154.301	0.000600341	0.000463432	0.000649906
155.4	0.000456259	0.000732869	0.000342056
156.501	0.000408232	0.000377212	0.000495981
157.6	0.000696396	0.000732869	0.000376261
158.7	0.000336191	0.000528097	0.000188131
159.8	0.000552314	0.000851422	0.000342056
160.901	0.000840477	0.000441877	0.000461775
162	0.000456259	0.000560429	0.000461775
163.1	0.000408232	0.000441877	0.000222336
164.2	0.000360205	0.000409545	0.000530186
165.301	0.000360205	0.000581984	0.000495981
166.401	0.000456259	0.000355657	0.000376261
167.5	0.000600341	0.000290992	0.000495981
168.6	0.000288164	0.000237105	0.000342056
169.7	0.000408232	0.000204772	0.000273645
170.8	0.000696396	0.000377212	0.000222336
171.9	0.000336191	0.000409545	0.000273645
173	0.000600341	0.000290992	0.00042757
174.101	0.000336191	0.000290992	0.000222336
175.2	9.60546e-05	0.000323325	0.000222336
176.3	0.000240136	0.000495764	0.000273645
177.5	0.000336191	0.000323325	0.00042757
178.601	0.000360205	0.000237105	0.000342056
179.7	0.000144082	0.000355657	0.000222336
180.801	0.000192109	0.00025866	0.000153925
181.901	9.60546e-05	0.000290992	0.000273645
183	0.000240136	0.000237105	0.000188131
184.101	9.60546e-05	0.00025866	0.000222336
185.2	0.000192109	0.00017244	3.42056e-05
186.301	0	8.62199e-05	0.000188131
187.401	0.000240136	0.000150885	0.000222336
188.5	0.000336191	0.00017244	0.000222336
189.6	0.000192109	0.000204772	0.000188131
190.7	9.60546e-05	0.000107775	0.000205233
191.801	0.000240136	0.00017244	6.84112e-05
192.901	0.000192109	0.00017244	0.000153925
194.001	4.80273e-05	8.62199e-05	0.000153925
195.101	4.80273e-05	0.000150885	0.00011972
196.201	0.000144082	0.00017244	3.42056e-05
197.3	9.60546e-05	0.000150885	0.00011972
198.4	0.000240136	0.000150885	0.000153925
199.5	0.000192109	8.62199e-05	0
200.6	0.000192109	0	0.00011972
201.7	0.000240136	0.000118552	0.000188131
202.801	0.000144082	0.000118552	6.84112e-05
203.9	4.80273e-05	0.000118552	6.84112e-05
205	0.000336191	0.000118552	0.000222336
206.1	0	0.000118552	6.84112e-05
207.201	4.80273e-05	5.38874e-05	0.000188131
208.301	9.60546e-05	9.69974e-05	0.000188131
209.401	0.000144082	0.00017244	3.42056e-05
210.501	4.80273e-05	0.000150885	0.000153925
211.6	4.80273e-05	8.62199e-05	0.00011972
212.7	9.60546e-05	0	0.00011972
213.801	0.000192109	0.000150885	3.42056e-05
214.901	9.60546e-05	0.000150885	3.42056e-05
216.001	4.80273e-05	8.62199e-05	0.00011972
217.1	0.000144082	8.62199e-05	0
218.2	4.80273e-05	6.46649e-05	0
219.3	4.80273e-05	1.07775e-05	0
220.4	0.000144082	0.000118552	0.000153925
221.5	0	0.000118552	0.00011972
222.601	4.80273e-05	0.000118552	0
223.7	0.000144082	5.38874e-05	6.84112e-05
224.801	4.80273e-05	3.23325e-05	0.00011972
225.9	0.000144082	8.62199e-05	0
227.001	4.80273e-05	3.23325e-05	3.42056e-05
228.201	4.80273e-05	3.23325e-05	3.42056e-05
229.3	9.60546e-05	0	3.42056e-05
230.401	0.000192109	0.000118552	6.84112e-05
231.5	-4.80273e-05	-2.1555e-05	-3.42056e-05
232.601	4.80273e-05	5.38874e-05	3.42056e-05
233.701	4.80273e-05	0	3.42056e-05
234.801	9.60546e-05	5.38874e-05	0
235.9	9.60546e-05	0.000150885	3.42056e-05
237	9.60546e-05	3.23325e-05	3.42056e-05
238.1	4.80273e-05	3.23325e-05	6.84112e-05
239.201	4.80273e-05	3.23325e-05	6.84112e-05
240.3	4.80273e-05	0.000118552	0
241.401	0	5.38874e-05	3.42056e-05
242.5	4.80273e-05	0	0
243.6	9.60546e-05	5.38874e-05	0
244.701	0	5.38874e-05	0
245.801	4.80273e-05	5.38874e-05	3.42056e-05
246.901	0	5.38874e-05	3.42056e-05
248.001	0	3.23325e-05	6.84112e-05
249.101	4.80273e-05	0	0
250.201	0	3.23325e-05	0.000188131
251.301	0	5.38874e-05	3.42056e-05
252.401	4.80273e-05	0	0
253.5	0.000144082	3.23325e-05	3.42056e-05
254.6	0	0	0
255.7	4.80273e-05	3.23325e-05	3.42056e-05
256.801	0	3.23325e-05	0
257.9	9.60546e-05	8.62199e-05	0
259	0	3.23325e-05	3.42056e-05
260.1	0	0	0
261.2	4.80273e-05	5.38874e-05	0
262.301	4.80273e-05	5.38874e-05	0
263.401	4.80273e-05	3.23325e-05	3.42056e-05
264.5	0	0	0
265.601	4.80273e-05	0	0
266.7	0	8.62199e-05	0
267.801	0	5.38874e-05	3.42056e-05
268.9	0	0	0
270.001	0	0	3.42056e-05
271.1	0	3.23325e-05	0
272.201	0	0	0
273.301	4.80273e-05	3.23325e-05	0
274.4	0	5.38874e-05	3.42056e-05
275.5	0	-2.1555e-05	-3.42056e-05
276.6	0	3.23325e-05	0
277.7	4.80273e-05	3.23325e-05	0
278.901	0	0	3.42056e-05
280.001	0	0	3.42056e-05
281.101	0	0	0

## Sheet: starved
Volume	Fraction	Fraction	Fraction
	rep_1	rep_2	rep_3
0	0	0	0
1.55699	0	0	0
3.11398	0	0	0
4.67002	0	0	0
6.22698	0	0	0
7.78406	0	0	0
9.34099	0.00664577	0.0079813	0.0102325
10.9001	0.00411405	0.00600717	0.006305
12.4501	0.00168782	0.00250702	0.00290293
14.0101	0.00171795	0.00213158	0.0021148
15.5701	0.00108502	0.0019378	0.00143176
17.12	0.00134121	0.00279769	0.00218048
18.6801	0.00176316	0.0033427	0.00262708
20.2401	0.00204949	0.00398459	0.002522
21.7901	0.00226047	0.00563172	0.0024826
23.3501	0.00265228	0.00643106	0.00386182
24.91	0.00337563	0.00822353	0.00434783
26.46	0.00455107	0.00959209	0.00549061
28.0202	0.00471684	0.00937409	0.00706686
29.58	0.0059827	0.00909553	0.00688296
31.14	0.00506344	0.0110576	0.00799948
32.6901	0.00675126	0.0108274	0.00788126
34.2502	0.00848428	0.0121112	0.0100092
35.81	0.0092227	0.0121476	0.00983843
37.3602	0.00994605	0.0122323	0.0108761
38.9201	0.00855963	0.0123413	0.00987784
40.48	0.0110461	0.0146546	0.0112439
42.0302	0.010368	0.0150421	0.0120977
43.5901	0.0119654	0.0146667	0.0125837
45.1501	0.012523	0.0149331	0.0127676
46.7002	0.0138642	0.0156962	0.0133325
48.26	0.0132765	0.0164107	0.0135295
49.8201	0.0144821	0.0187845	0.0147379
51.37	0.0144821	0.0176582	0.0150926
52.93	0.0161397	0.019051	0.0163667
54.4902	0.0158986	0.019487	0.0156312
56.0401	0.0168028	0.0204195	0.0170104
57.6	0.0180234	0.0194022	0.0186917
59.1603	0.0187167	0.0206012	0.0178248
60.71	0.0190482	0.0201168	0.0198214
62.2702	0.0193797	0.0209403	0.0199396
63.8303	0.0188221	0.0214005	0.018626
65.3801	0.0189427	0.0214127	0.0197951
66.9401	0.0193496	0.0199956	0.019204
68.5004	0.0210223	0.0209403	0.018718
70.0502	0.0193194	0.019923	0.0195849
71.6103	0.0199222	0.0221514	0.0199527
73.1701	0.0210525	0.0198866	0.0195587
74.7202	0.0199072	0.0197413	0.0203993
76.2803	0.0191537	0.019596	0.0195981
77.84	0.0206908	0.0176945	0.0182845
79.3904	0.0188071	0.018615	0.0198608
80.9499	0.019003	0.0168104	0.0168528
82.51	0.018566	0.0161806	0.0178379
84.0603	0.0173453	0.0157204	0.0177722
85.6201	0.0166973	0.0148484	0.0153028
87.18	0.0155671	0.0153449	0.0159333
88.7304	0.0142711	0.0146667	0.0156706
90.2903	0.0157479	0.0130801	0.0156049
91.8501	0.0145574	0.0121839	0.0137397
93.4104	0.0143766	0.0109728	0.0145015
94.9601	0.0125682	0.0109243	0.0125181
96.5202	0.0119805	0.0109243	0.0139104
98.0803	0.0129449	0.0102945	0.0113884
99.6301	0.0120106	0.00851419	0.0102325
101.2	0.0112722	0.00899864	0.010574
102.7	0.0107749	0.0094952	0.0104164
104.3	0.0113777	0.00777541	0.00977276
105.9	0.00988577	0.00790863	0.0101405
107.4	0.00877061	0.00753319	0.00811769
109	0.00789656	0.00727885	0.00844608
110.5	0.0079267	0.00661273	0.0079732
112.1	0.00852949	0.00651584	0.00717194
113.6	0.00759517	0.00559539	0.00756601
115.2	0.00705265	0.00565594	0.00690923
116.801	0.00751982	0.00551061	0.00665966
118.3	0.00744447	0.00500194	0.0064889
119.9	0.00584707	0.00455382	0.0056351
121.4	0.00705265	0.0042026	0.00622619
123	0.00563609	0.00425104	0.00547747
124.5	0.00545526	0.00374237	0.00462367
126.1	0.00619368	0.00451749	0.00386182
127.7	0.00446065	0.00353648	0.00492579
129.2	0.00501823	0.00353648	0.00450545
130.801	0.00536484	0.00393615	0.00430842
132.3	0.00488261	0.00279769	0.00412452
133.9	0.00372223	0.00303992	0.00405885
135.401	0.00396335	0.00257969	0.00408512
137	0.0040387	0.00317314	0.00366478
138.601	0.00358661	0.00261603	0.00395376
140.101	0.00316465	0.00233747	0.00401944
141.7	0.00376744	0.00245858	0.00357284
143.2	0.00337563	0.00249491	0.00350716
144.8	0.00346605	0.00158657	0.00246946
146.3	0.00348112	0.00211947	0.00273217
147.9	0.00361675	0.00169557	0.00266649
149.401	0.00342084	0.00233747	0.00283725
151	0.00265228	0.00181668	0.00260081
152.6	0.00265228	0.00153813	0.00202286
154.1	0.00271256	0.00175613	0.00250887
155.7	0.00260707	0.00144124	0.00208853
157.2	0.00221526	0.0014049	0.00243005
158.8	0.00233582	0.00123535	0.00193091
160.3	0.00186865	0.0014049	0.00204913
161.901	0.00203442	0.00162291	0.00185209
163.5	0.001944	0.00165924	0.00202286
165	0.00210977	0.00130801	0.00198345
166.6	0.0015974	0.0017198	0.0014843
168.101	0.001296	0.00104157	0.0014449
169.7	0.00220019	0.00098101	0.00141863
171.2	0.00176316	0.00102946	0.00140549
172.801	0.00153712	0.00101734	0.00154998
174.4	0.00156726	0.000920453	0.0012216
175.901	0.00215498	0.000956787	0.0014843
177.5	0.00156726	0.000956787	0.0014449
179	0.00167275	0.00098101	0.00177328
180.6	0.00138642	0.00119901	0.00102456
182.1	0.00117544	0.00088412	0.00114278
183.7	0.00120558	0.000763007	0.00111651
185.301	0.00153712	0.000581339	0.00141863
186.8	0.000828838	0.00049656	0.000998292
188.4	0.00103981	0.000557117	0.000932615
189.9	0.00100968	0.000557117	0.00128727
191.5	0.00119051	0.000460227	0.000998292
193.001	0.000828838	0.000581339	0.000735584
194.601	0.00108502	0.000738785	0.000801261
196.201	0.00132614	0.000557117	0.000801261
197.7	0.000934326	0.000302781	0.000709313
199.301	0.00066307	0.000460227	0.000669907
200.8	0.00069321	0.000581339	0.000735584
202.4	0.000889117	0.000605561	0.000656771
203.9	0.000979535	0.000460227	0.000972022
205.5	0.000542512	0.000726674	0.00060423
207	0.00103981	0.000302781	0.000866938
208.601	0.001296	0.000363337	0.000486011
210.2	0.000723349	0.000484449	0.00060423
211.701	0.00069321	0.000399671	0.000972022
213.301	0.000889117	0.000230113	0.000564823
214.8	0.000376744	0.00049656	0.000420334
216.401	0.000527442	0.000399671	0.000669907
217.901	0.000406884	0.000448115	0.000538552
219.501	0.000316465	0.000242225	0.000735584
221.101	0.000482233	0.000302781	0.000486011
222.601	0.000376744	0.000181668	0.000380927
224.201	0.000482233	0.000157446	0.000446604
225.7	0.000421954	0.000339114	0.000486011
227.301	0.000316465	0.000218002	0.000486011
228.801	0.000316465	0.000242225	0.000446604
230.401	0.000316465	0.000181668	0.000446604
232	0.000210977	0.000278558	0.000328386
233.501	0.000376744	0.000218002	0.000197031
235.101	0.000421954	9.68898e-05	0.000380927
236.601	0.000421954	6.05561e-05	0.000288979
238.201	0.000180837	9.68898e-05	0.000262709
239.701	0.000421954	0.000121112	0.000197031
241.301	0.000210977	0.000218002	0.000262709
242.9	0.000452093	0.000242225	0.000197031
244.401	0.000210977	9.68898e-05	0.000223302
246.001	0.000210977	0.000278558	0.000131354
247.501	0.000135628	0.000181668	0.000157625
249.101	0.000241116	0.000218002	0.000131354
250.6	0.000316465	6.05561e-05	0.000131354
252.201	0.000105488	0.000218002	0.000262709
253.801	0.000210977	9.68898e-05	0.000197031
255.3	0.000180837	0.000121112	0.000197031
256.9	0.000527442	0.000121112	0.000131354
258.4	0.000210977	0.000121112	9.1948e-05
260.001	0.000135628	9.68898e-05	6.56771e-05
261.501	0.000210977	6.05561e-05	0.000131354
263.101	0.000180837	3.63337e-05	0.000223302
264.601	0.000135628	3.63337e-05	0.000197031
266.201	7.53489e-05	6.05561e-05	0.000197031
267.801	0.000105488	6.05561e-05	9.1948e-05
269.3	0.000210977	9.68898e-05	0.000157625
270.901	0.000120558	4.84449e-05	0.00014449
272.401	0.000135628	6.05561e-05	0
274	7.53489e-05	6.05561e-05	2.62709e-05
275.5	0.000241116	0	6.56771e-05
277.101	0.000105488	6.05561e-05	9.1948e-05
278.701	0.000105488	3.63337e-05	9.1948e-05
280.2	0.000135628	0	0
281.801	0.000105488	0	6.56771e-05
283.3	7.53489e-05	0.000181668	0
284.901	0	3.63337e-05	0
286.401	0	3.63337e-05	6.56771e-05
288.001	0.000180837	3.63337e-05	9.1948e-05
289.6	7.53489e-05	0	2.62709e-05
291.101	0.000135628	0	9.1948e-05
292.701	0.000105488	0	9.1948e-05
294.201	0.000105488	0	0
295.801	0	0	6.56771e-05
297.301	0	9.68898e-05	2.62709e-05
298.901	3.01395e-05	9.68898e-05	2.62709e-05
300.5	0.000180837	3.63337e-05	0
302.001	7.53489e-05	0	2.62709e-05
303.601	3.01395e-05	3.63337e-05	0
305.1	0.000105488	0	2.62709e-05
306.701	3.01395e-05	3.63337e-05	0
308.201	0.000105488	0	2.62709e-05
309.8	3.01395e-05	3.63337e-05	6.56771e-05
311.401	3.01395e-05	6.05561e-05	2.62709e-05
312.9	7.53489e-05	0	6.56771e-05
314.501	0	0	6.56771e-05
316.001	3.01395e-05	0	0
317.601	3.01395e-05	0	6.56771e-05
319.101	3.01395e-05	0	0
320.701	3.01395e-05	0	2.62709e-05
322.201	3.01395e-05	3.63337e-05	2.62709e-05
323.8	3.01395e-05	3.63337e-05	0
325.4	3.01395e-05	3.63337e-05	2.62709e-05
326.901	0	0	2.62709e-05
328.501	0	3.63337e-05	0
330.001	0	6.05561e-05	2.62709e-05
331.6	3.01395e-05	0	0
333.1	0	3.63337e-05	9.1948e-05
334.701	0	3.63337e-05	2.62709e-05
336.301	0	3.63337e-05	0
337.8	0	3.63337e-05	0
339.401	0	0	0
340.901	0	3.63337e-05	2.62709e-05
342.5	0	0	2.62709e-05
344.001	3.01395e-05	0	2.62709e-05
345.601	0	3.63337e-05	0
347.201	0	3.63337e-05	0
348.701	0	3.63337e-05	0
350.301	3.01395e-05	0	2.62709e-05
351.8	3.01395e-05	3.63337e-05	0
353.401	0	0	0
354.9	0	0	0
356.501	3.01395e-05	0	0
358.101	0	0	2.62709e-05
359.601	3.01395e-05	0	0
361.201	3.01395e-05	0	0
362.701	0	3.63337e-05	0
364.3	0	0	2.62709e-05
365.801	0	0	0
367.401	0	0	0
369.001	3.01395e-05	0	0
370.501	0	0	2.62709e-05
372.101	3.01395e-05	0	0
373.6	0	3.63337e-05	0
375.201	0	0	0
376.701	0	0	0
378.301	0	0	0
379.8	-1.50698e-05	-1.21112e-05	-1.31354e-05
381.4	0	0	0
383.001	0	0	0
384.5	3.01395e-05	0	0
386.101	0	0	6.56771e-05
387.601	0	0	2.62709e-05
389.201	-1.50698e-05	-1.21112e-05	-1.31354e-05
390.701	0	0	0
392.3	3.01395e-05	0	0
393.902	0	3.63337e-05	0
395.402	3.01395e-05	0	2.62709e-05
397.001	0	0	0
