# Supplementary material for: Uncovering and resolving challenges of quantitative modeling in a simplified community of interacting cells
Source: PLoS Biol. 2019 Feb 22;17(2):e3000135. doi: 10.1371/journal.pbio.3000135 (PMC6402699; doi:10.1371/journal.pbio.3000135)
Supplement: S23 Data — (XLSX) [file pbio.3000135.s065.xlsx]

## Sheet: S18ABC
Time	Dead Cell density	Live cell density	Live cell density integrated over time	Lysine	Increased dead cell density from t0
hr	(cells/ml)	(cells/ml)	Cells/ml/hr	uM	cells/mL
0	3700	2500000	0	0	0
15.2	13000	5100000	58000000	8.5	9500
24.8	44000	4100000	100000000	19.6	40000
40.9	160000	4400000	170000000	41.8	160000
49.5	120000	4000000	210000000	54.5	120000
67.1	640000	3600000	280000000	91.9	640000
89.6	1500000	3100000	350000000	131.2	1500000
111.7	2800000	2400000	410000000	181.2	2800000
133.3	3500000	1300000	450000000	255.5	3500000
159.2	3900000	800000	480000000	294.7	3900000
184.5	5000000	680000	500000000	323.1	5000000
205.7	4700000	400000	510000000	350.1	4700000
