# Supplementary material for: Uncovering and resolving challenges of quantitative modeling in a simplified community of interacting cells
Source: PLoS Biol. 2019 Feb 22;17(2):e3000135. doi: 10.1371/journal.pbio.3000135 (PMC6402699; doi:10.1371/journal.pbio.3000135)
Supplement: S24 Data — (XLSX) [file pbio.3000135.s066.xlsx]

## Sheet: S19
time	dead	live	dead_2SD	live_2SD	lys	lys_2SD
hr	cells/ml	cells/ml	cells/ml	cells/ml	cells/ml	cells/ml
0	120000	3400000	8896.96	432835	21.4168	1.30859
10	280000	2200000	24993.3	356410	9.13785	0.856673
24	580000	5800000	27149.7	411817	16.9907	1.30859
48	960000	5300000	85820.9	570162	48.6876	3.4622
58	970000	5400000	20476.3	329518	49.3085	8.69428
72	1.02453e+06	6.03308e+06	53941.3	413386	55.5279	4.76975
0	122381	3.39015e+06	8896.96	432835	21.4168	1.30859
10	238688	1.99683e+06	15907.4	150997	8.70951	1.71335
24	539177	5.77957e+06	16218.7	113479	18.1329	0.856673
48	1.03442e+06	4.73252e+06	29048.8	133120	56.3976	1.30859
58	1.02495e+06	4.42512e+06	42913.9	252737	64.2505	6.54295
72	1.09493e+06	5.31276e+06	51552.2	97991.5	79.4047	2.9676
0	122381	3.39015e+06	8896.96	432835	21.4168	1.30859
10	249977	1.95933e+06	9996.61	69083.3	9.28062	0.4946
24	542416	6.09785e+06	3027.28	109241	21.4168	2.15591
48	1.02955e+06	4.59478e+06	12268.3	148964	50.5437	8.581
58	1.05196e+06	4.2446e+06	51269.8	260353	67.3916	2.26654
72	993930	5.42615e+06	72582.4	371547	61.1979	5.70401
