# Supplementary material for: Uncovering and resolving challenges of quantitative modeling in a simplified community of interacting cells
Source: PLoS Biol. 2019 Feb 22;17(2):e3000135. doi: 10.1371/journal.pbio.3000135 (PMC6402699; doi:10.1371/journal.pbio.3000135)
Supplement: S25 Data — (XLSX) [file pbio.3000135.s067.xlsx]

## Sheet: S22A
Time	L-A+ fraction evolved	error	A-L+ fraction evolved	error
(hr)
27	0	0.0351781	0.0595238	0.0516309
45	0.21875	0.146158	0.15625	0.0741159
68	0.9375	0.0855816	0.145833	0.0720434

## Sheet: S22B
Time (hr)	L-A+ fraction evolved	error	A-L+ fraction evolved	error
96	0	0.048734	0.352273	0.101841
