# Supplementary material for: Uncovering and resolving challenges of quantitative modeling in a simplified community of interacting cells
Source: PLoS Biol. 2019 Feb 22;17(2):e3000135. doi: 10.1371/journal.pbio.3000135 (PMC6402699; doi:10.1371/journal.pbio.3000135)
Supplement: S26 Data — (XLSX) [file pbio.3000135.s068.xlsx]

## Sheet: S23
	diffusion coefficient	uniform or spot	agar depth	Growth Rate	2*stdev
	(um^2/sec)		(mm)	(/hr)	(/hr)
Exp				0.110455	0.0117086
Calculated				0.1
Spatial sim	360	u	30	0.099
Spatial sim	360	u	30	0.1
Spatial sim	360	u	5	0.102
Spatial sim	360	s	5	0.098
Spatial sim	360	s	5	0.099
Spatial sim	360	u	5	0.102
Spatial sim	20	u	30	0.096
Spatial sim	20	u	30	0.097
Spatial sim	20	u	5	0.096
Spatial sim	20	s	5	0.094
Spatial sim	20	u	5	0.096
